# Supplementary material for: Bioactive sesquiterpene quinols and quinones from the marine sponge Dysidea avara
Source: Royal Society of Chemistry journal article supplement (doi:10.1039/c5ra18876h), 2015-01-01
Supplement: c5ra18876h1.pdf [file c5ra18876h1.pdf]

## Electronic Supplementary Information

# Bioactive Sesquiterpene Quinolins and Quinones from the Marine Sponge *Dysidea avara*

Wei-Hua Jiao, Ting-Ting Xu, Bin-Bin Gu, Guo-Hua Shi, Yan Zhu, Fan Yang,

Bing-Nan Han, Shu-Ping Wang, Yu-Shan Li,\* Wei Zhang, Jia Li, and Hou-Wen Lin\*

## Contents

- Figure S1.**  $^1\text{H}$  NMR Spectrum of Dysiquinol A (**1**) in  $\text{CDCl}_3$ .
- Figure S2.**  $^{13}\text{C}$  NMR Spectrum of Dysiquinol A (**1**) in  $\text{CDCl}_3$ .
- Figure S3.** DEPT135 Spectrum of Dysiquinol A (**1**) in  $\text{CDCl}_3$ .
- Figure S4.**  $^1\text{H}$ - $^1\text{H}$  COSY Spectrum of Dysiquinol A (**1**) in  $\text{CDCl}_3$ .
- Figure S5.** HSQC Spectrum of Dysiquinol A (**1**) in  $\text{CDCl}_3$ .
- Figure S6.** HMBC Spectrum of Dysiquinol A (**1**) in  $\text{CDCl}_3$ .
- Figure S7.** NOESY Spectrum of Dysiquinol A (**1**) in  $\text{CDCl}_3$ .
- Figure S8.** HRESIMS of Dysiquinol A (**1**).
- Figure S9.** CD Spectrum of Dysiquinol A (**1**) in MeOH.
- Figure S10.** UV Spectrum of Dysiquinol A (**1**) in MeOH.
- Figure S11.** IR Spectrum of Dysiquinol A (**1**).
- Figure S12.**  $^1\text{H}$  NMR Spectrum of Dysiquinol B (**2**) in  $\text{CDCl}_3$ .
- Figure S13.**  $^{13}\text{C}$  NMR Spectrum of Dysiquinol B (**2**) in  $\text{CDCl}_3$ .
- Figure S14.** DEPT135 Spectrum of Dysiquinol B (**2**) in  $\text{CDCl}_3$ .
- Figure S15.**  $^1\text{H}$ - $^1\text{H}$  COSY Spectrum of Dysiquinol B (**2**) in  $\text{CDCl}_3$ .
- Figure S16.** HSQC Spectrum of Dysiquinol B (**2**) in  $\text{CDCl}_3$ .
- Figure S17.** HMBC Spectrum of Dysiquinol B (**2**) in  $\text{CDCl}_3$ .
- Figure S18.** NOESY Spectrum of Dysiquinol B (**2**) in  $\text{CDCl}_3$ .
- Figure S19.** HRESIMS of Dysiquinol B (**2**).
- Figure S20.** CD Spectrum of Dysiquinol B (**2**) in MeOH.
- Figure S21.** UV Spectrum of Dysiquinol B (**2**) in MeOH.

**Figure S22.** IR Spectrum of Dysiquinol B (**2**).

**Figure S23.**  $^1\text{H}$  NMR Spectrum of Dysiquinol C (**3**) in  $\text{CDCl}_3$ .

**Figure S24.**  $^{13}\text{C}$  NMR Spectrum of Dysiquinol C (**3**) in  $\text{CDCl}_3$ .

**Figure S25.** DEPT135 Spectrum of Dysiquinol C (**3**) in  $\text{CDCl}_3$ .

**Figure S26.**  $^1\text{H}$ - $^1\text{H}$  COSY Spectrum of Dysiquinol C (**3**) in  $\text{CDCl}_3$ .

**Figure S27.** HSQC Spectrum of Dysiquinol C (**3**) in  $\text{CDCl}_3$ .

**Figure S28.** HMBC Spectrum of Dysiquinol C (**3**) in  $\text{CDCl}_3$ .

**Figure S29.** NOESY Spectrum of Dysiquinol C (**3**) in  $\text{CDCl}_3$ .

**Figure S30.** HRESIMS of Dysiquinol C (**3**).

**Figure S31.** CD Spectrum of Dysiquinol C (**3**) in MeOH.

**Figure S32.** UV Spectrum of Dysiquinol C (**3**) in MeOH.

**Figure S33.** IR Spectrum of Dysiquinol C (**3**).

**Figure S34.**  $^1\text{H}$  NMR Spectrum of Dysiquinol D (**4**) in  $\text{CDCl}_3$ .

**Figure S35.**  $^{13}\text{C}$  NMR Spectrum of Dysiquinol D (**4**) in  $\text{CDCl}_3$ .

**Figure S36.** DEPT135 Spectrum of Dysiquinol D (**4**) in  $\text{CDCl}_3$ .

**Figure S37.**  $^1\text{H}$ - $^1\text{H}$  COSY Spectrum of Dysiquinol D (**4**) in  $\text{CDCl}_3$ .

**Figure S38.** HSQC Spectrum of Dysiquinol D (**4**) in  $\text{CDCl}_3$ .

**Figure S39.** HMBC Spectrum of Dysiquinol D (**4**) in  $\text{CDCl}_3$ .

**Figure S40.** NOESY Spectrum of Dysiquinol D (**4**) in  $\text{CDCl}_3$ .

**Figure S41.** HRESIMS of Dysiquinol D (**4**).

**Figure S42.** CD Spectrum of Dysiquinol D (**4**) in MeOH.

**Figure S43.** UV Spectrum of Dysiquinol D (**4**) in MeOH.

**Figure S44.** IR Spectrum of Dysiquinol D (**4**).

**Figure S45.**  $^1\text{H}$  NMR Spectrum of (5*S*,8*S*,9*R*,10*S*)-18-ethoxylneoavarone (**5**) in  $\text{CDCl}_3$ .

**Figure S46.**  $^{13}\text{C}$  NMR Spectrum of (5*S*,8*S*,9*R*,10*S*)-18-ethoxylneoavarone (**5**) in  $\text{CDCl}_3$ .

**Figure S47.** DEPT135 Spectrum of (5*S*,8*S*,9*R*,10*S*)-18-ethoxylneoavarone (**5**) in  $\text{CDCl}_3$ .

**Figure S48.**  $^1\text{H}$ - $^1\text{H}$  COSY Spectrum of (5*S*,8*S*,9*R*,10*S*)-18-ethoxylneoavarone (**5**) in  $\text{CDCl}_3$ .

**Figure S49.** HSQC Spectrum of (5*S*,8*S*,9*R*,10*S*)-18-ethoxylneoavarone (**5**) in  $\text{CDCl}_3$ .

**Figure S50.** HMBC Spectrum of (5*S*,8*S*,9*R*,10*S*)-18-ethoxylneoavarone (**5**) in  $\text{CDCl}_3$ .

**Figure S51.** NOESY Spectrum of (5*S*,8*S*,9*R*,10*S*)-18-ethoxylneoavarone (**5**) in  $\text{CDCl}_3$ .

**Figure S52.** HRESIMS of (5*S*,8*S*,9*R*,10*S*)-18-ethoxylneoavarone (**5**).

**Figure S53.** CD Spectrum of (5*S*,8*S*,9*R*,10*S*)-18-ethoxylneoavarone (**5**) in MeOH.

**Figure S54.** UV Spectrum of (5*S*,8*S*,9*R*,10*S*)-18-ethoxylneoavarone (**5**) in MeOH.

**Figure S55.** IR Spectrum of (5*S*,8*S*,9*R*,10*S*)-18-ethoxylneoavarone (**5**).

**Figure S56.**  $^1\text{H}$  NMR Spectrum of (5*S*,8*S*,9*R*,10*S*)-19-ethoxylneoavarone (**6**) in  $\text{CDCl}_3$ .

**Figure S57.**  $^{13}\text{C}$  NMR Spectrum of (5*S*,8*S*,9*R*,10*S*)-19-ethoxylneoavarone (**6**) in  $\text{CDCl}_3$ .

**Figure S58.** DEPT135 Spectrum of (5*S*,8*S*,9*R*,10*S*)-19-ethoxylneoavarone (**6**) in

CDCl<sub>3</sub>.

**Figure S59.** <sup>1</sup>H-<sup>1</sup>H COSY Spectrum of (5*S*,8*S*,9*R*,10*S*)-19-ethoxylneoavarone (**6**) in CDCl<sub>3</sub>.

**Figure S60.** HSQC Spectrum of (5*S*,8*S*,9*R*,10*S*)-19-ethoxylneoavarone (**6**) in CDCl<sub>3</sub>.

**Figure S61.** HMBC Spectrum of (5*S*,8*S*,9*R*,10*S*)-19-ethoxylneoavarone (**6**) in CDCl<sub>3</sub>.

**Figure S62.** NOESY Spectrum of (5*S*,8*S*,9*R*,10*S*)-19-ethoxylneoavarone (**6**) in CDCl<sub>3</sub>.

**Figure S63.** HRESIMS of (5*S*,8*S*,9*R*,10*S*)-19-ethoxyneoavarone (**6**).

**Figure S64.** CD Spectrum of (5*S*,8*S*,9*R*,10*S*)-19-ethoxylneoavarone (**6**) in MeOH.

**Figure S65.** UV Spectrum of (5*S*,8*S*,9*R*,10*S*)-19-ethoxylneoavarone (**6**) in MeOH.

**Figure S66.** IR Spectrum of (5*S*,8*S*,9*R*,10*S*)-19-ethoxylneoavarone (**6**)

**Figure S67.** <sup>1</sup>H NMR Spectrum of (5*R*,8*R*,9*S*,10*R*)-18-ethoxylavarone (**7**) in CDCl<sub>3</sub>.

**Figure S68.** <sup>13</sup>C NMR Spectrum of (5*R*,8*R*,9*S*,10*R*)-18-ethoxylavarone (**7**) in CDCl<sub>3</sub>.

**Figure S69.** DEPT135 Spectrum of (5*R*,8*R*,9*S*,10*R*)-18-ethoxylavarone (**7**) in CDCl<sub>3</sub>.

**Figure S70.** <sup>1</sup>H-<sup>1</sup>H COSY Spectrum of (5*R*,8*R*,9*S*,10*R*)-18-ethoxylavarone (**7**) in CDCl<sub>3</sub>.

**Figure S71.** HSQC Spectrum of (5*R*,8*R*,9*S*,10*R*)-18-ethoxylavarone (**7**) in CDCl<sub>3</sub>.

**Figure S72.** HMBC Spectrum of (5*R*,8*R*,9*S*,10*R*)-18-ethoxylavarone (**7**) in CDCl<sub>3</sub>.

**Figure S73.** NOESY Spectrum of (5*R*,8*R*,9*S*,10*R*)-18-ethoxylavarone (**7**) in CDCl<sub>3</sub>.

**Figure S74.** HRESIMS of (5*R*,8*R*,9*S*,10*R*)-18-ethoxylavarone (**7**).

**Figure S75.** CD Spectrum of (5*R*,8*R*,9*S*,10*R*)-18-ethoxylavarone (**7**) in MeOH.

**Figure S76.** UV Spectrum of (5*R*,8*R*,9*S*,10*R*)-18-ethoxylavarone (**7**) in MeOH.

**Figure S77.** IR Spectrum of (5*R*,8*R*,9*S*,10*R*)-18-ethoxylavarone (**7**).

**Figure S78.** <sup>1</sup>H NMR Spectrum of (5*R*,8*R*,9*S*,10*R*)-19-ethoxylavarone (**8**) in CDCl<sub>3</sub>.

**Figure S79.** <sup>13</sup>C NMR Spectrum of (5*R*,8*R*,9*S*,10*R*)-19-ethoxylavarone (**8**) in CDCl<sub>3</sub>.

**Figure S80.** DEPT135 Spectrum of (5*R*,8*R*,9*S*,10*R*)-19-ethoxylavarone (**8**) in CDCl<sub>3</sub>.

**Figure S81.** <sup>1</sup>H-<sup>1</sup>H COSY Spectrum of (5*R*,8*R*,9*S*,10*R*)-19-ethoxylavarone (**8**) in CDCl<sub>3</sub>.

**Figure S82.** HSQC Spectrum of (5*R*,8*R*,9*S*,10*R*)-19-ethoxylavarone (**8**) in CDCl<sub>3</sub>.

**Figure S83.** HMBC Spectrum of (5*R*,8*R*,9*S*,10*R*)-19-ethoxylavarone (**8**) in CDCl<sub>3</sub>.

**Figure S84.** NOESY Spectrum of (5*R*,8*R*,9*S*,10*R*)-19-ethoxylavarone (**8**) in CDCl<sub>3</sub>.

**Figure S85.** HRESIMS of (5*R*,8*R*,9*S*,10*R*)-19-ethoxylavarone (**8**).

**Figure S86.** CD Spectrum of (5*R*,8*R*,9*S*,10*R*)-19-ethoxylavarone (**8**) in MeOH.

**Figure S87.** UV Spectrum of (5*R*,8*R*,9*S*,10*R*)-19-ethoxylavarone (**8**) in MeOH.

**Figure S88.** IR Spectrum of (5*R*,8*R*,9*S*,10*R*)-19-ethoxylavarone (**8**).

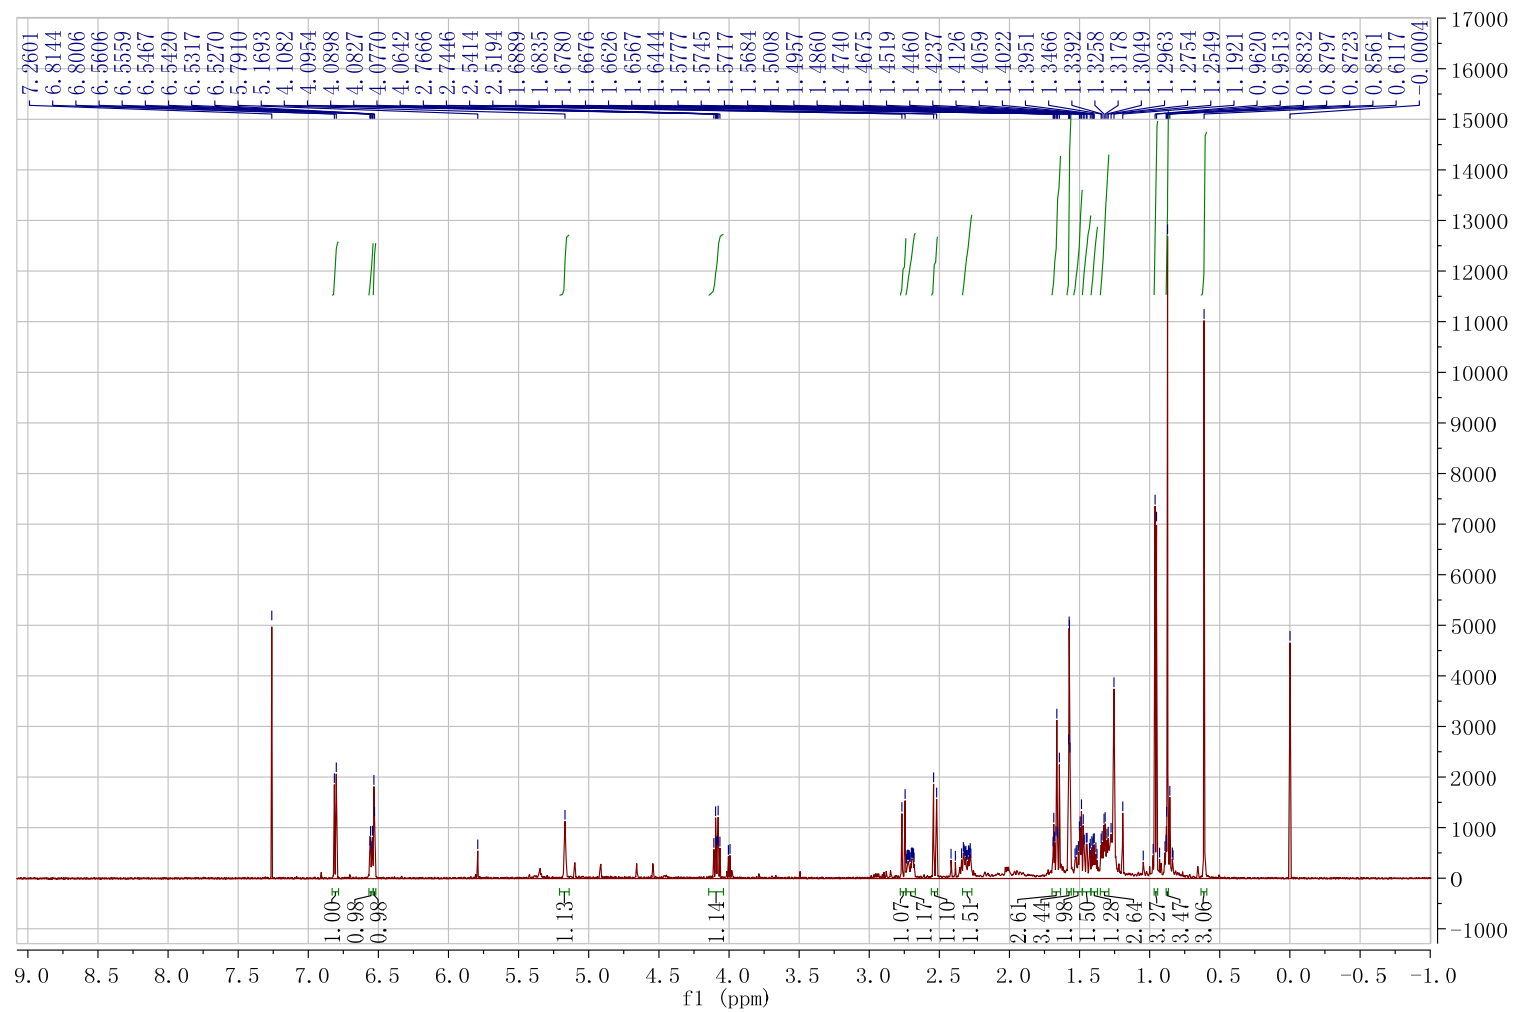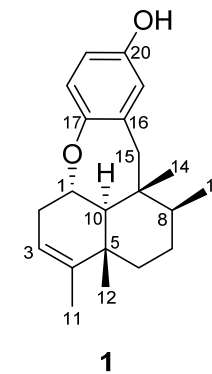

**Figure S1.**  $^1\text{H}$  NMR Spectrum of Dysiquinol A (**1**) in  $\text{CDCl}_3$ .

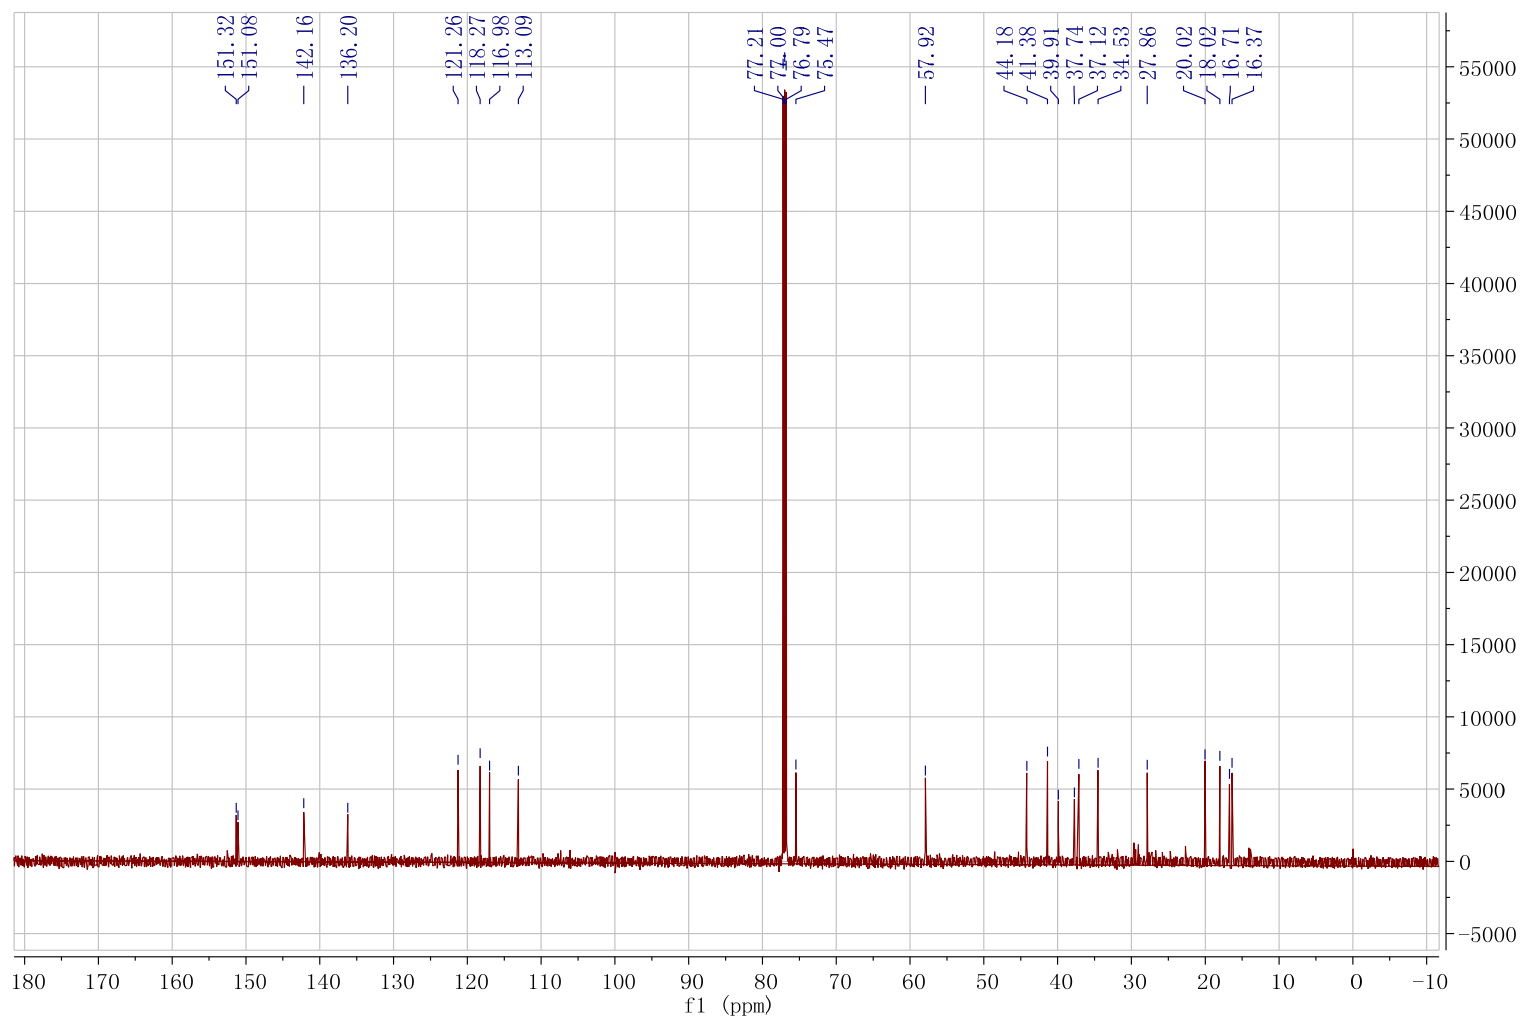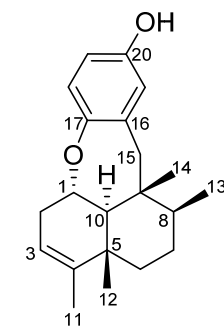

**1**

**Figure S2.**  $^{13}\text{C}$  NMR Spectrum of Dysiquinol A (**1**) in  $\text{CDCl}_3$ .



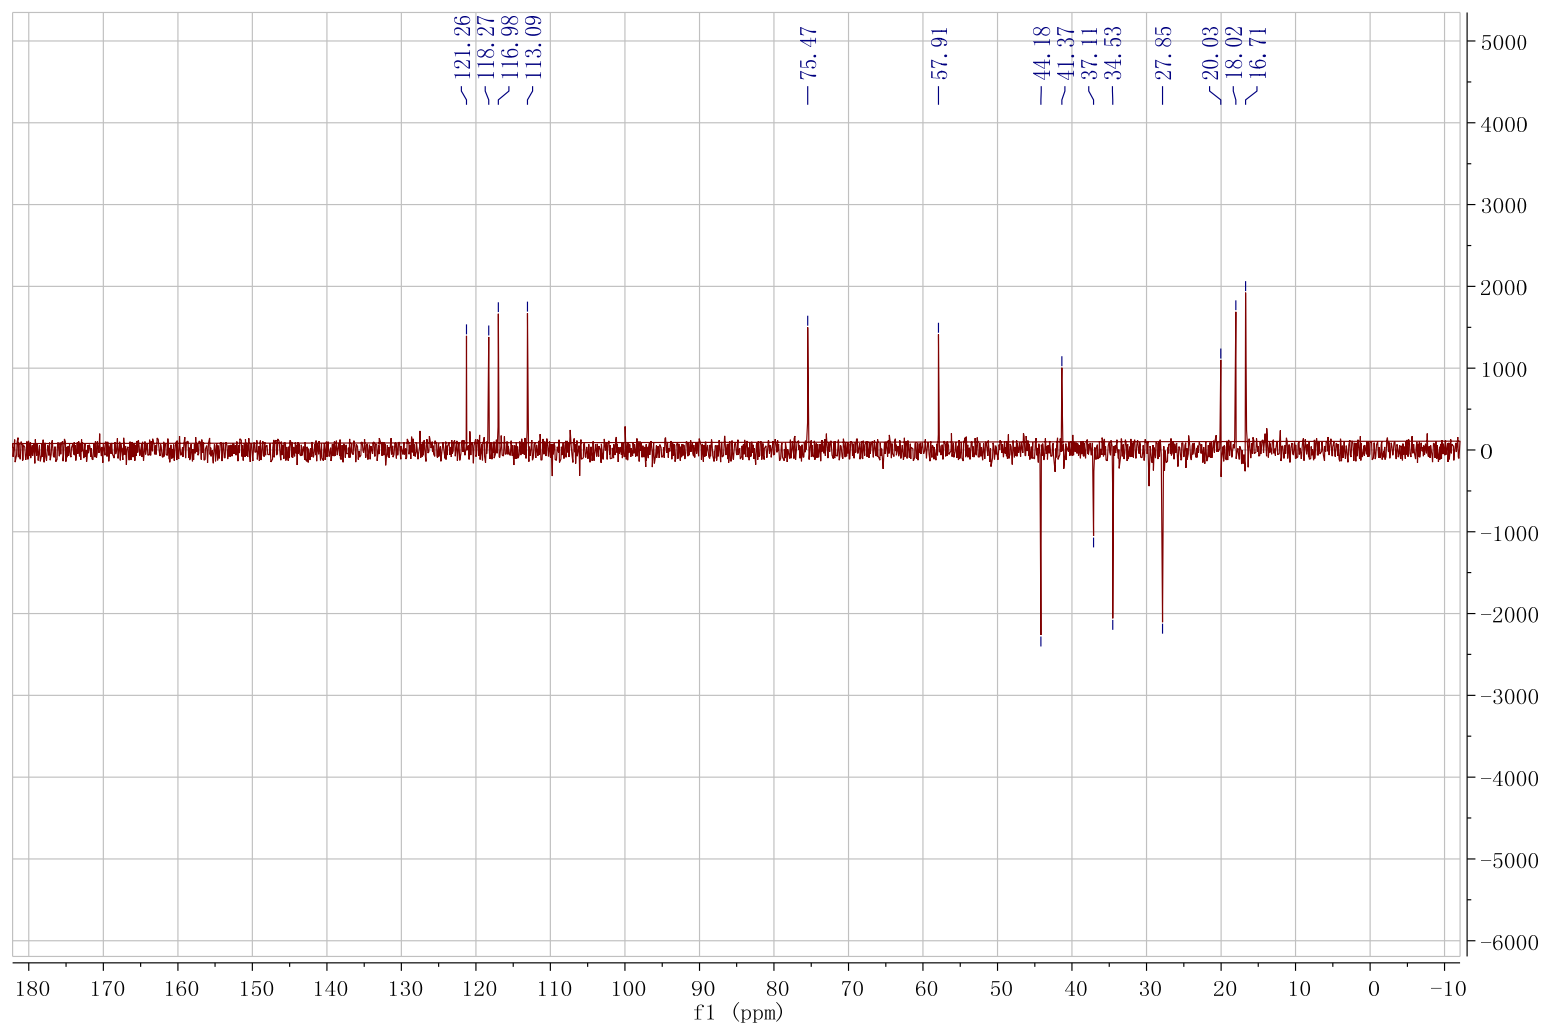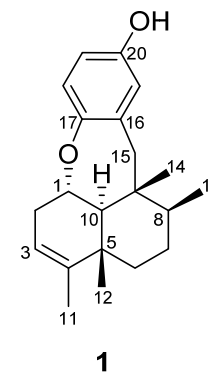

**Figure S3.** DEPT135 Spectrum of Dysiquinol A (1) in CDCl<sub>3</sub>.

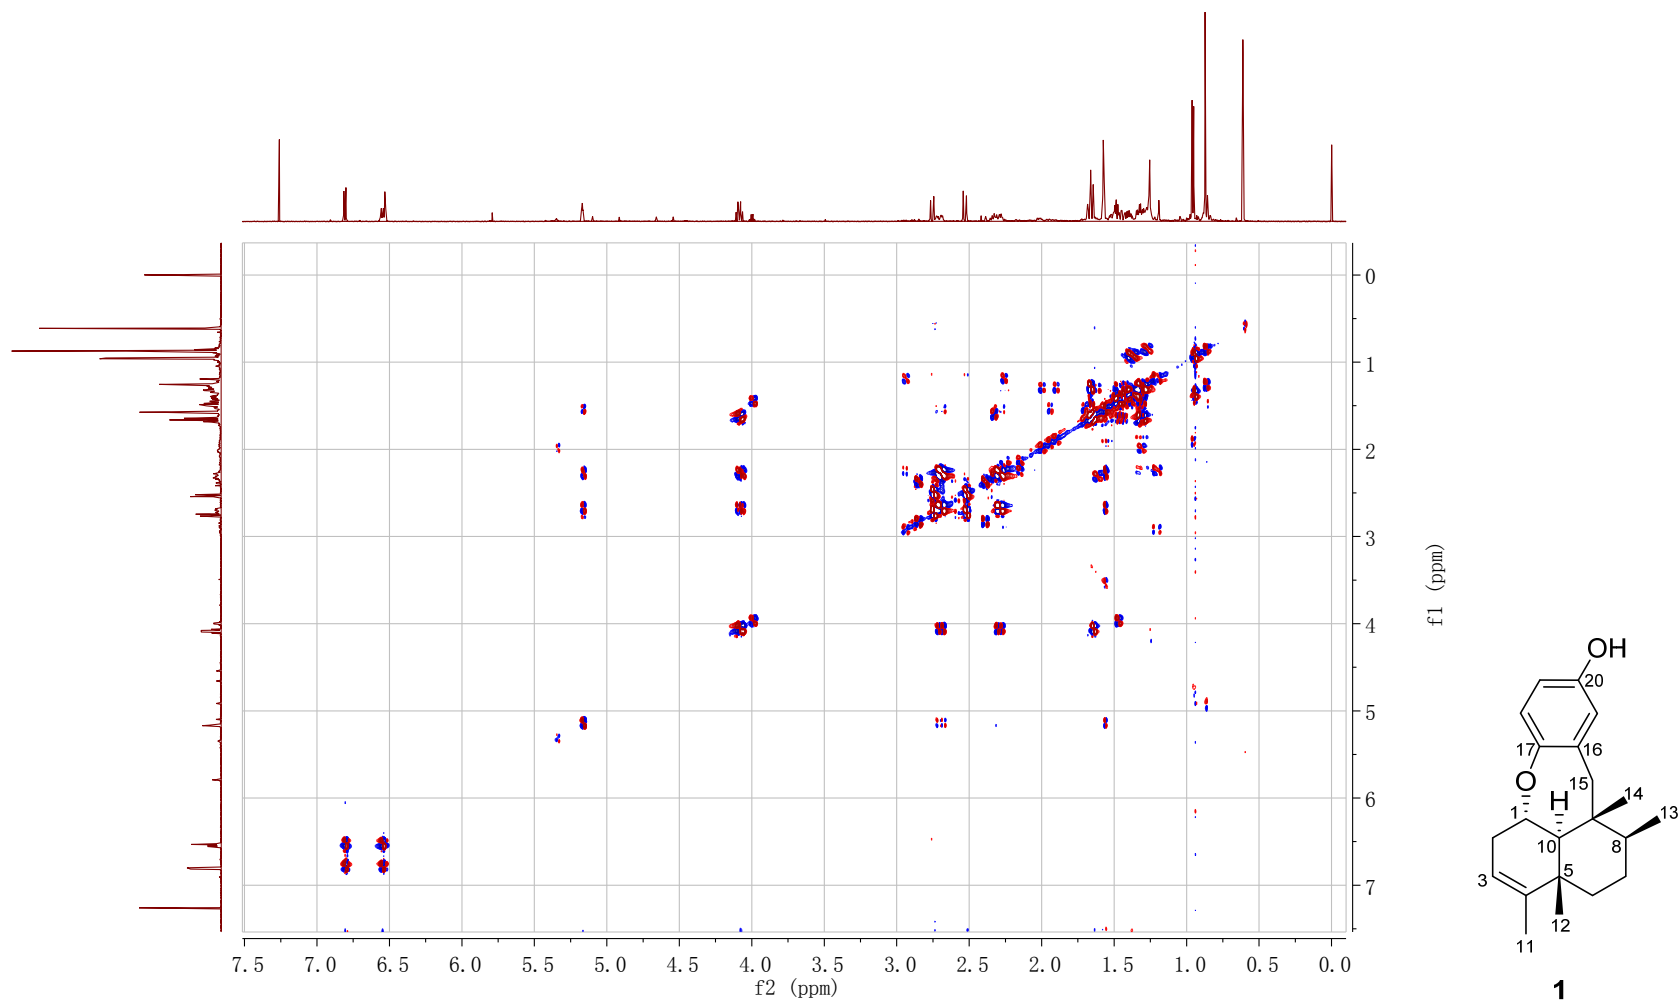

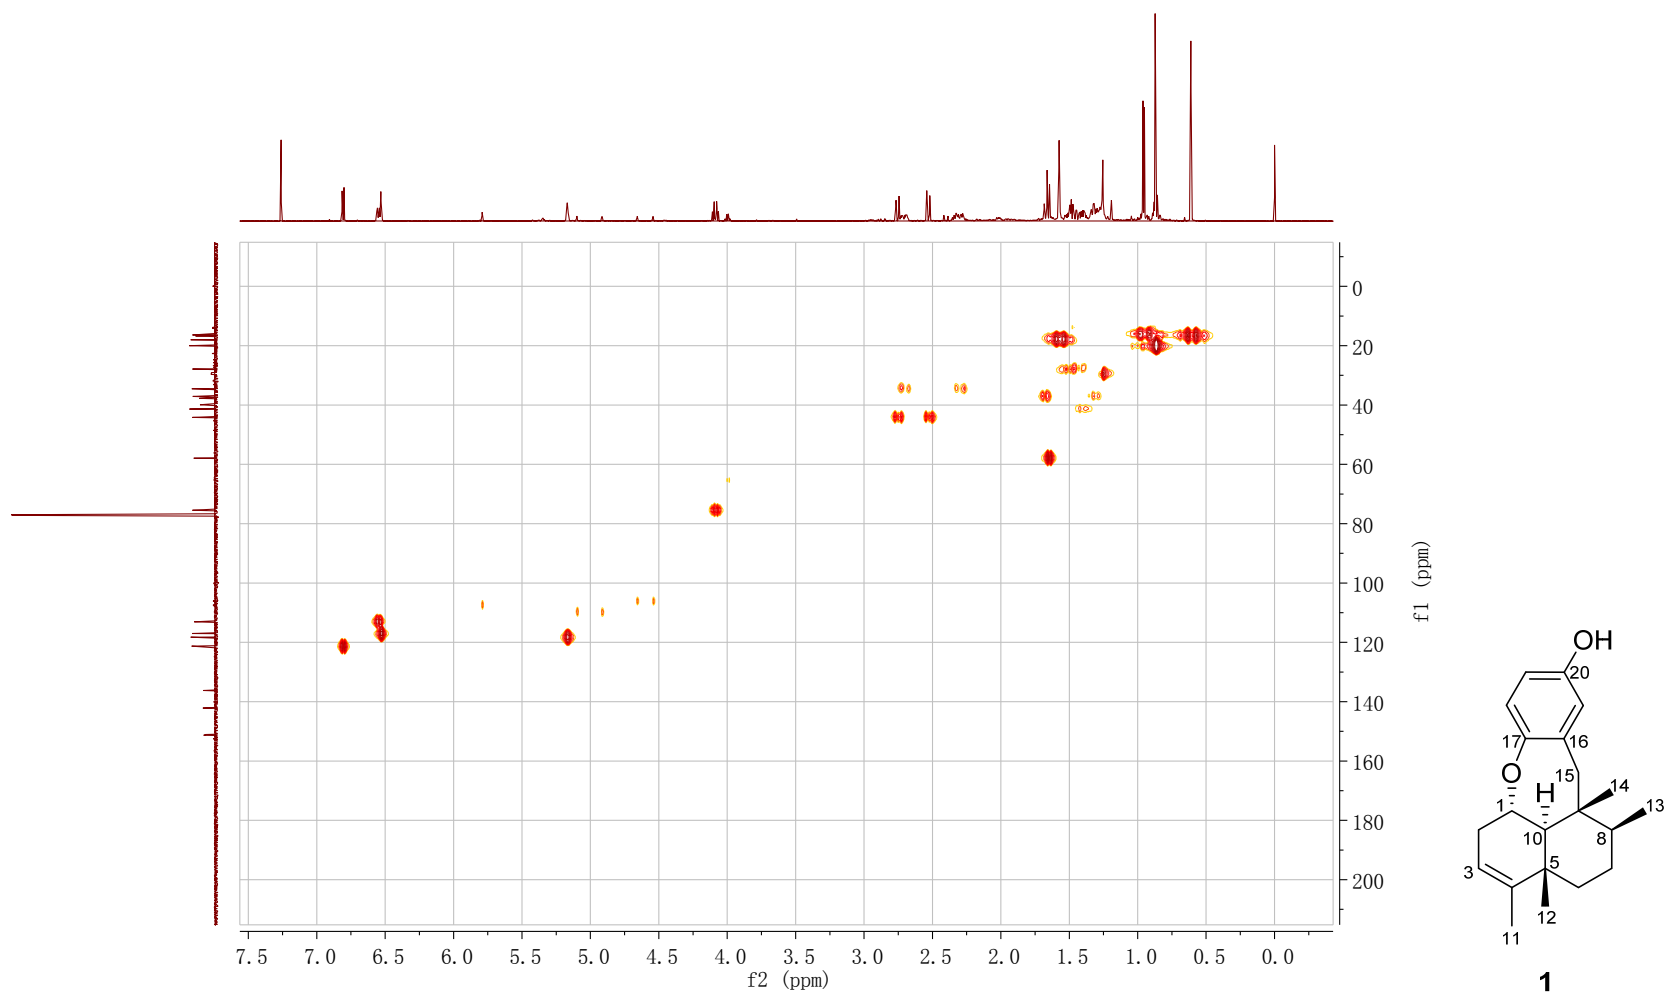

**Figure S5.** HSQC Spectrum of Dysiquinol A (**1**) in CDCl<sub>3</sub>.

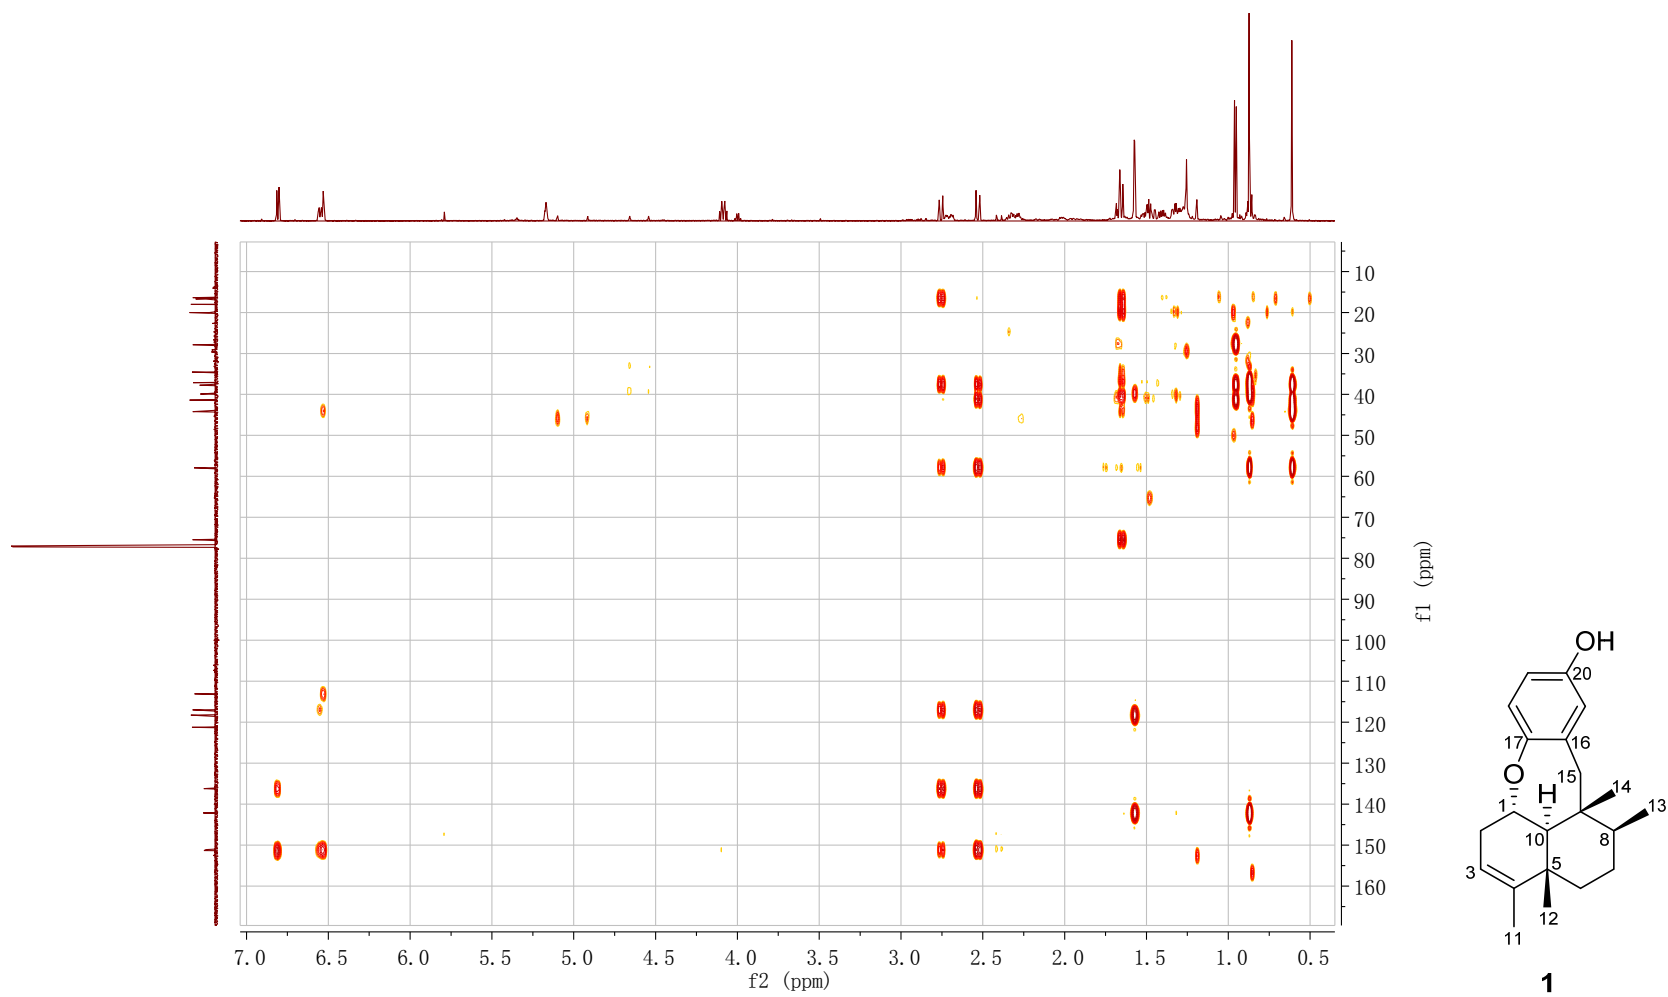

**Figure S6.** HMBC Spectrum of Dysiquinol A (**1**) in CDCl<sub>3</sub>.

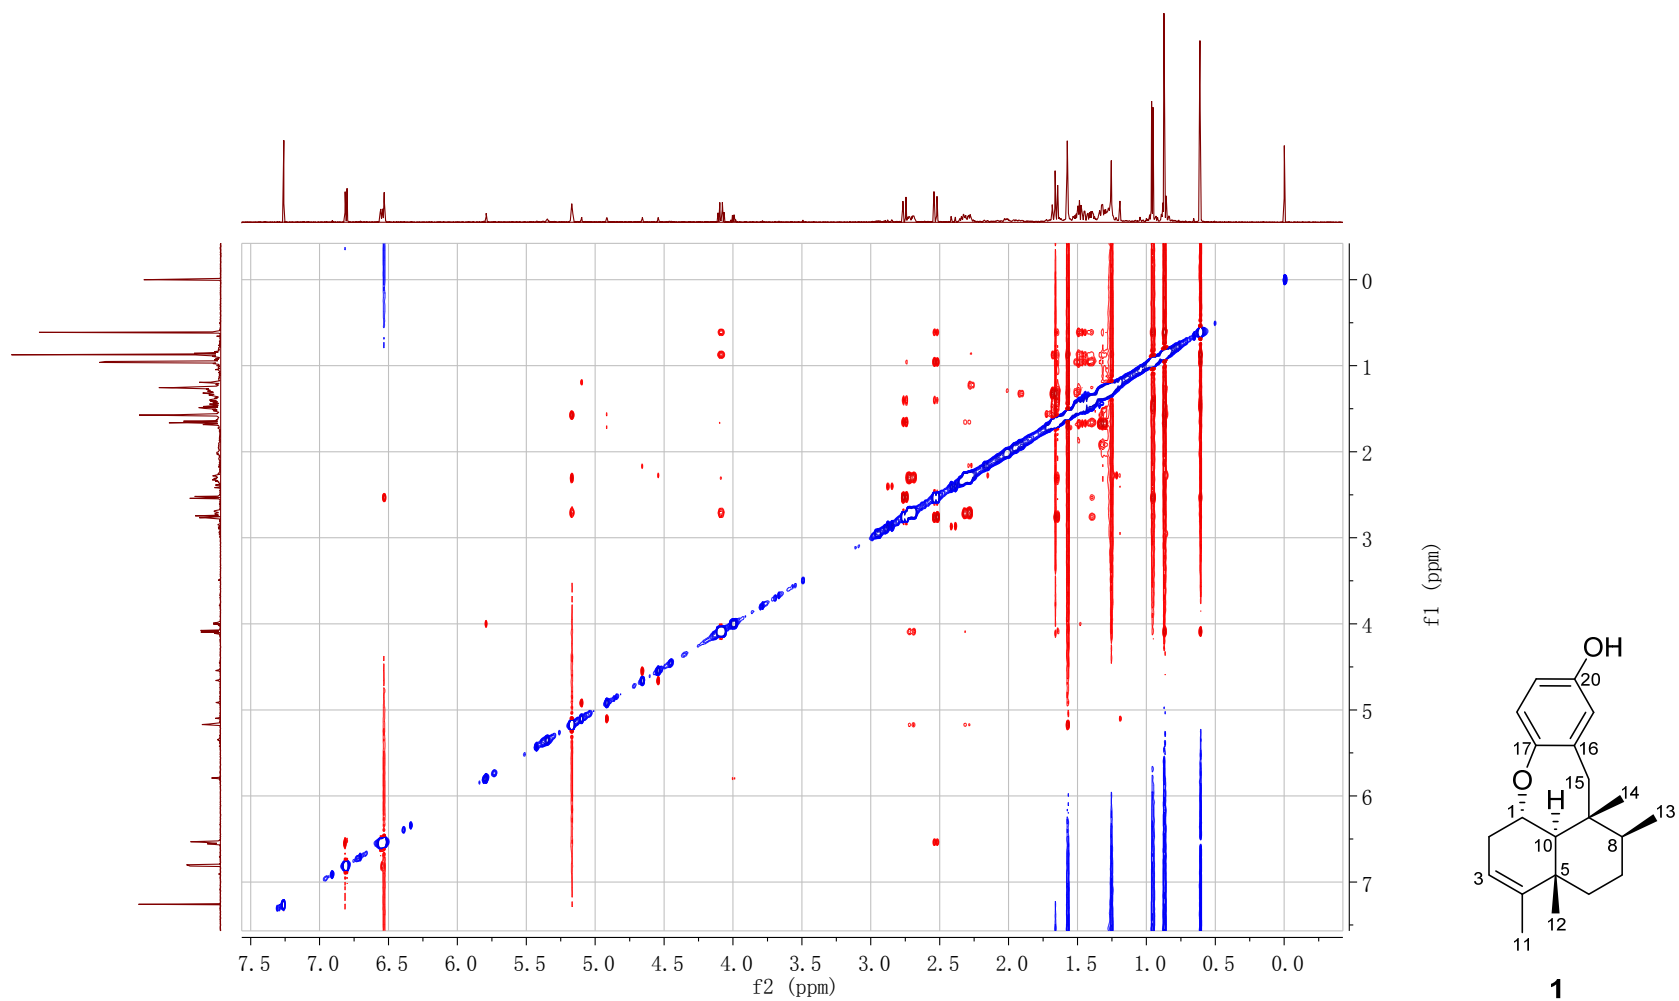

**Figure S7.** NOESY Spectrum of Dysiquinol A (**1**) in CDCl<sub>3</sub>.

Elemental Composition Report

G2H4E3

Tolerance = 10.0 PPM / DBE: min = -1.5, max = 50.0

Selected filters: None

Monoisotopic Mass, Even Electron Ions

9 formula(e) evaluated with 1 results within limits (up to 50 closest results for each mass)

Elements Used:

C: 10-25 H: 10-40 O: 1-4

SIPI

G2H4E3 M.W=312

WQ12-317H 23 (0.809) AM (Cen,4, 80.00, Ar,5000.0,318.28,0.70); Sm (SG, 2x1.00); Cm (15:23)

Q-ToF micro  
YA019  
313.2170

13-Jul-2012,10:58:39

TOF MS ES+  
2.52e5

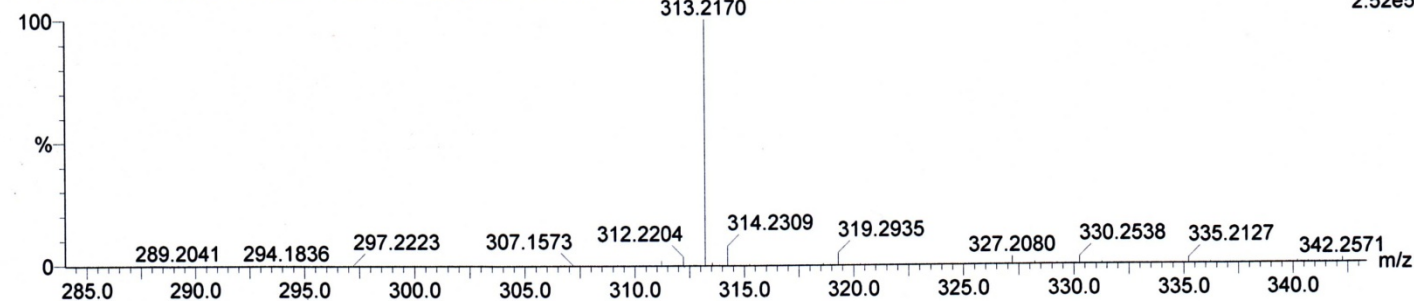

Minimum: 70.00  
Maximum: 100.00

| Mass     | RA     | Calc. Mass | mDa | PPM | DBE | i-FIT   | Formula    |
|----------|--------|------------|-----|-----|-----|---------|------------|
| 313.2170 | 100.00 | 313.2168   | 0.2 | 0.6 | 7.5 | 34309.8 | C21 H29 O2 |

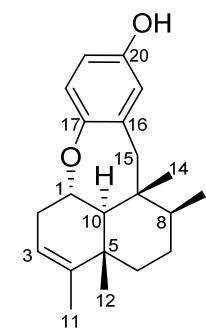

1

Figure S8. HRESIMS of Dysiquinol A (1).

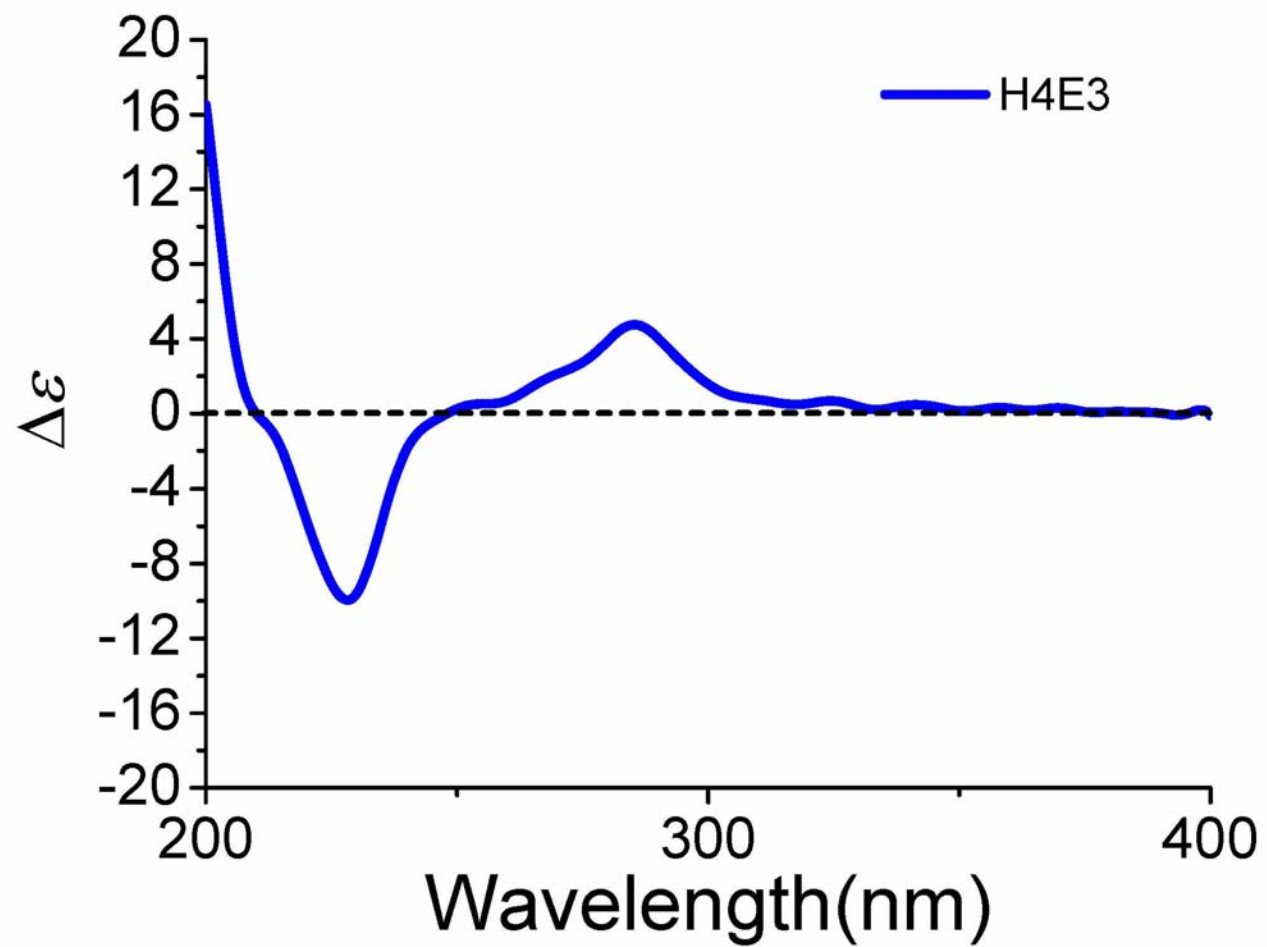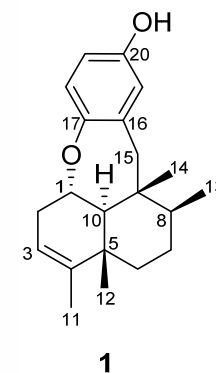

**Figure S9.** CD Spectrum of Dysiquinol A (1) in MeOH.

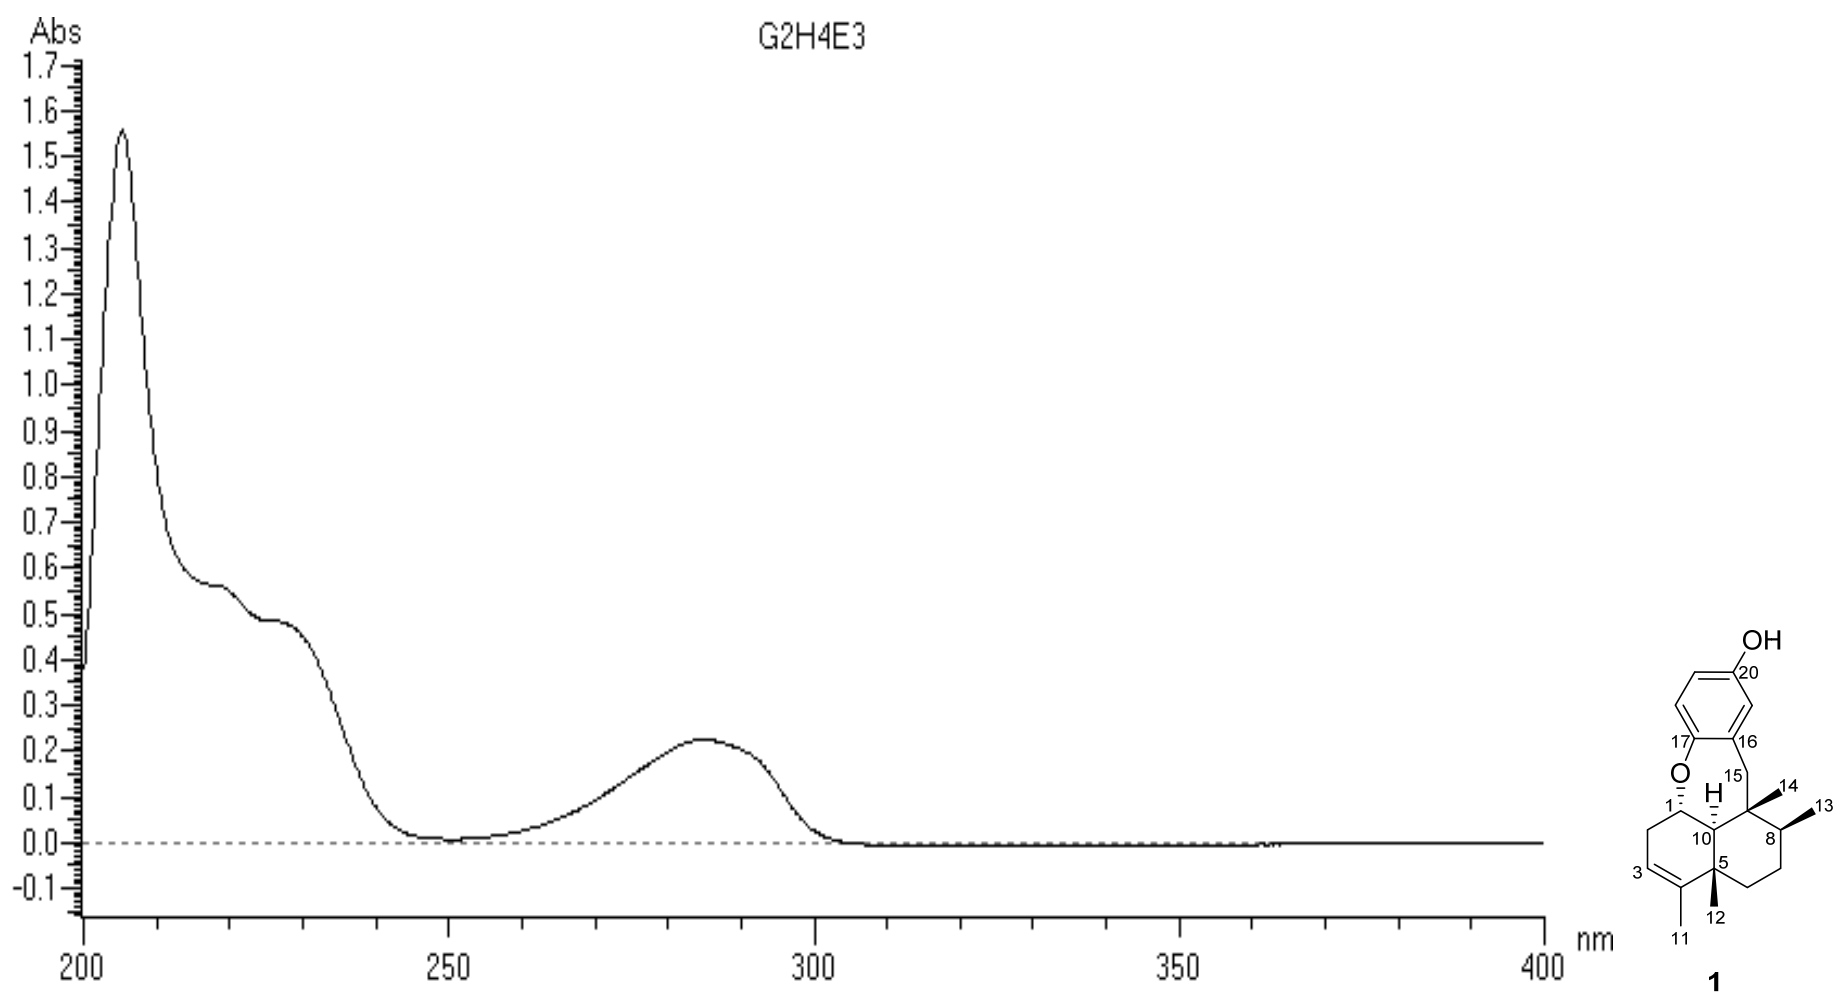

**Figure S10.** UV Spectrum of Dysiquinol A (**1**).



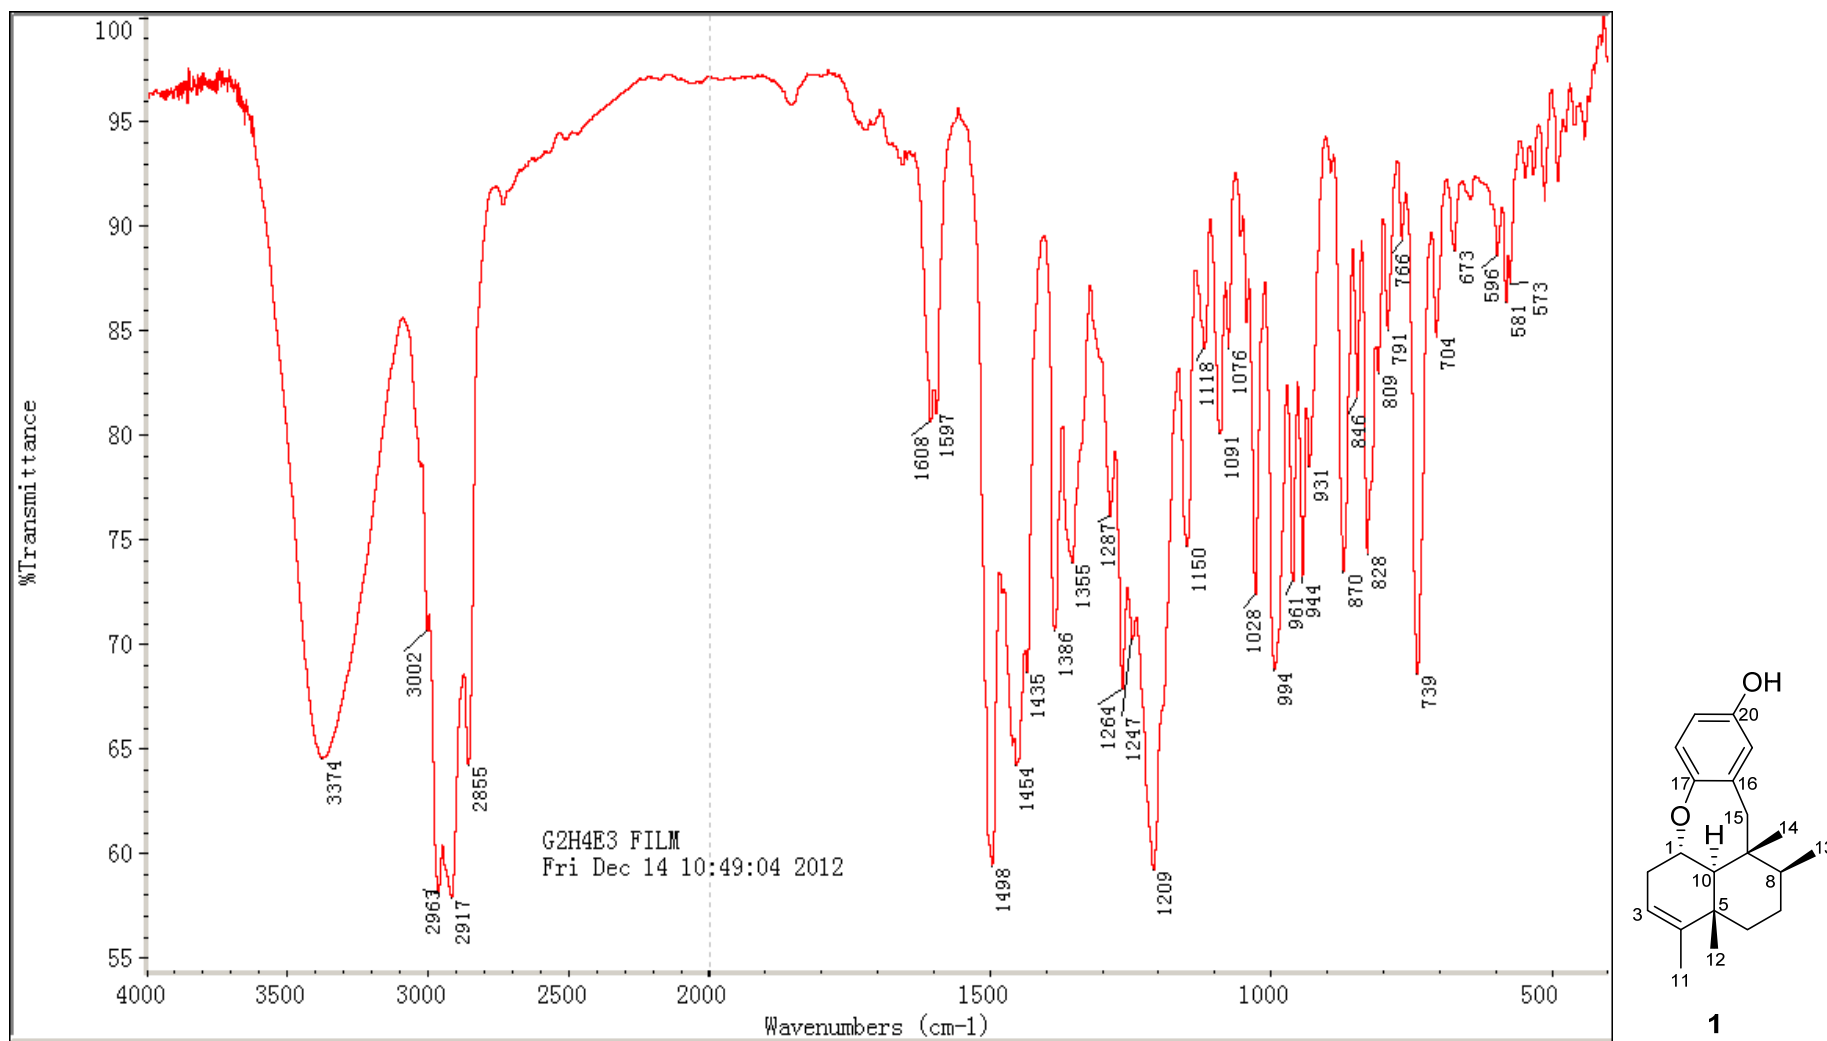

**Figure S11.** IR Spectrum of Dysiquinol A (**1**).

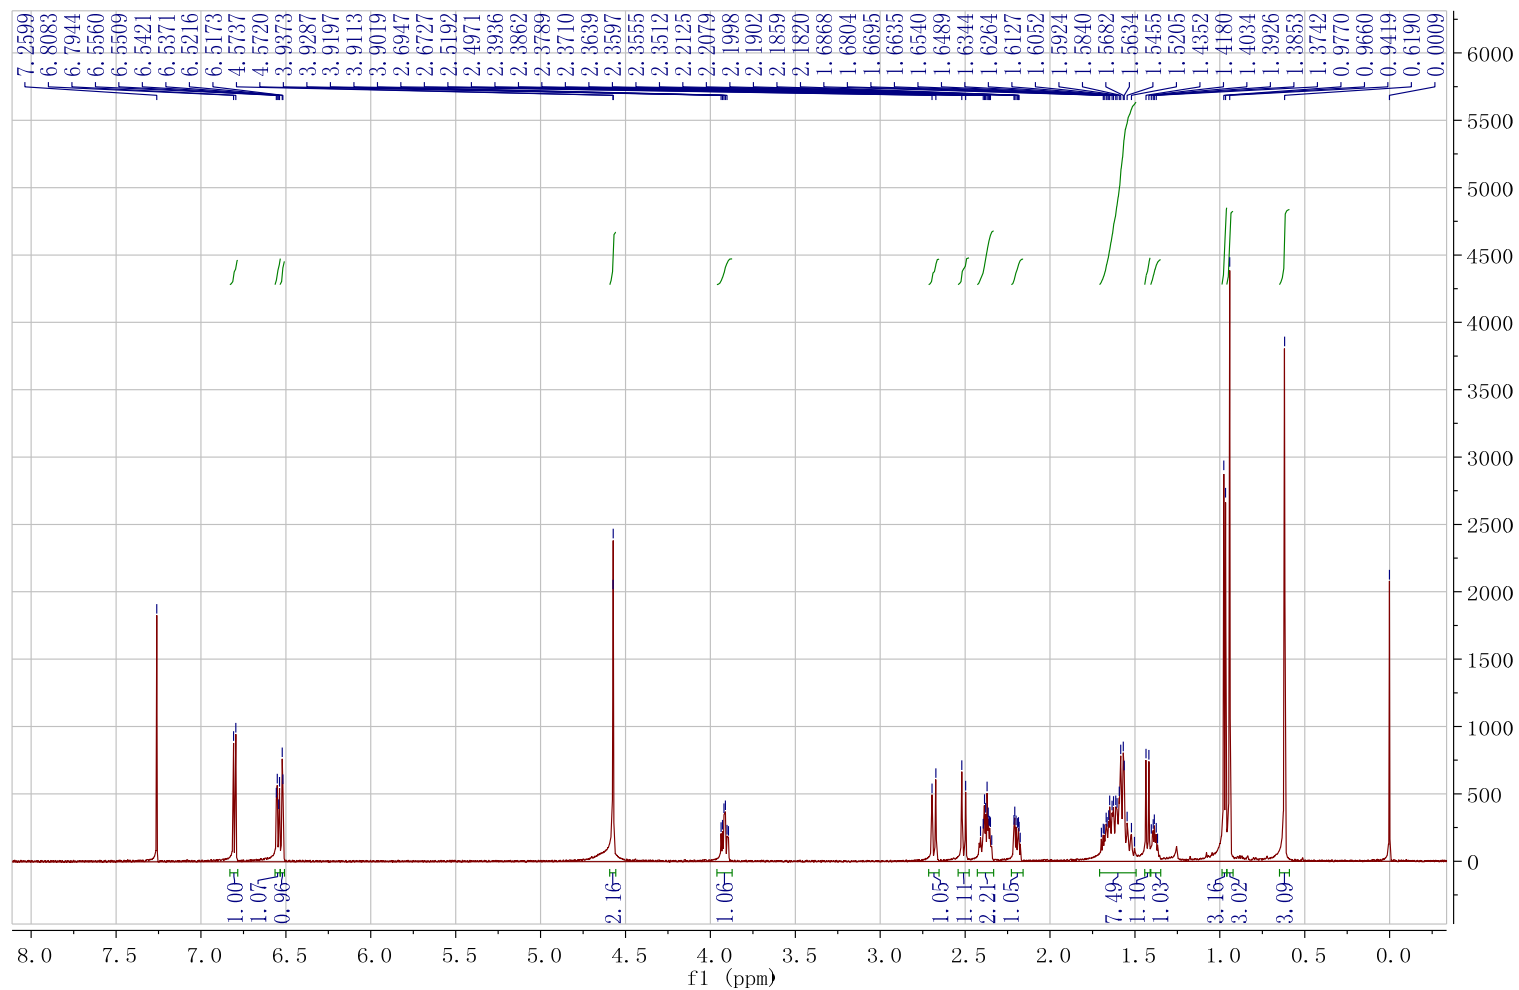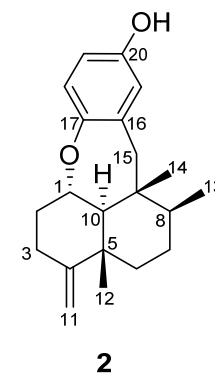

Figure S12. <sup>1</sup>H NMR Spectrum of Dysiquinol B (2).

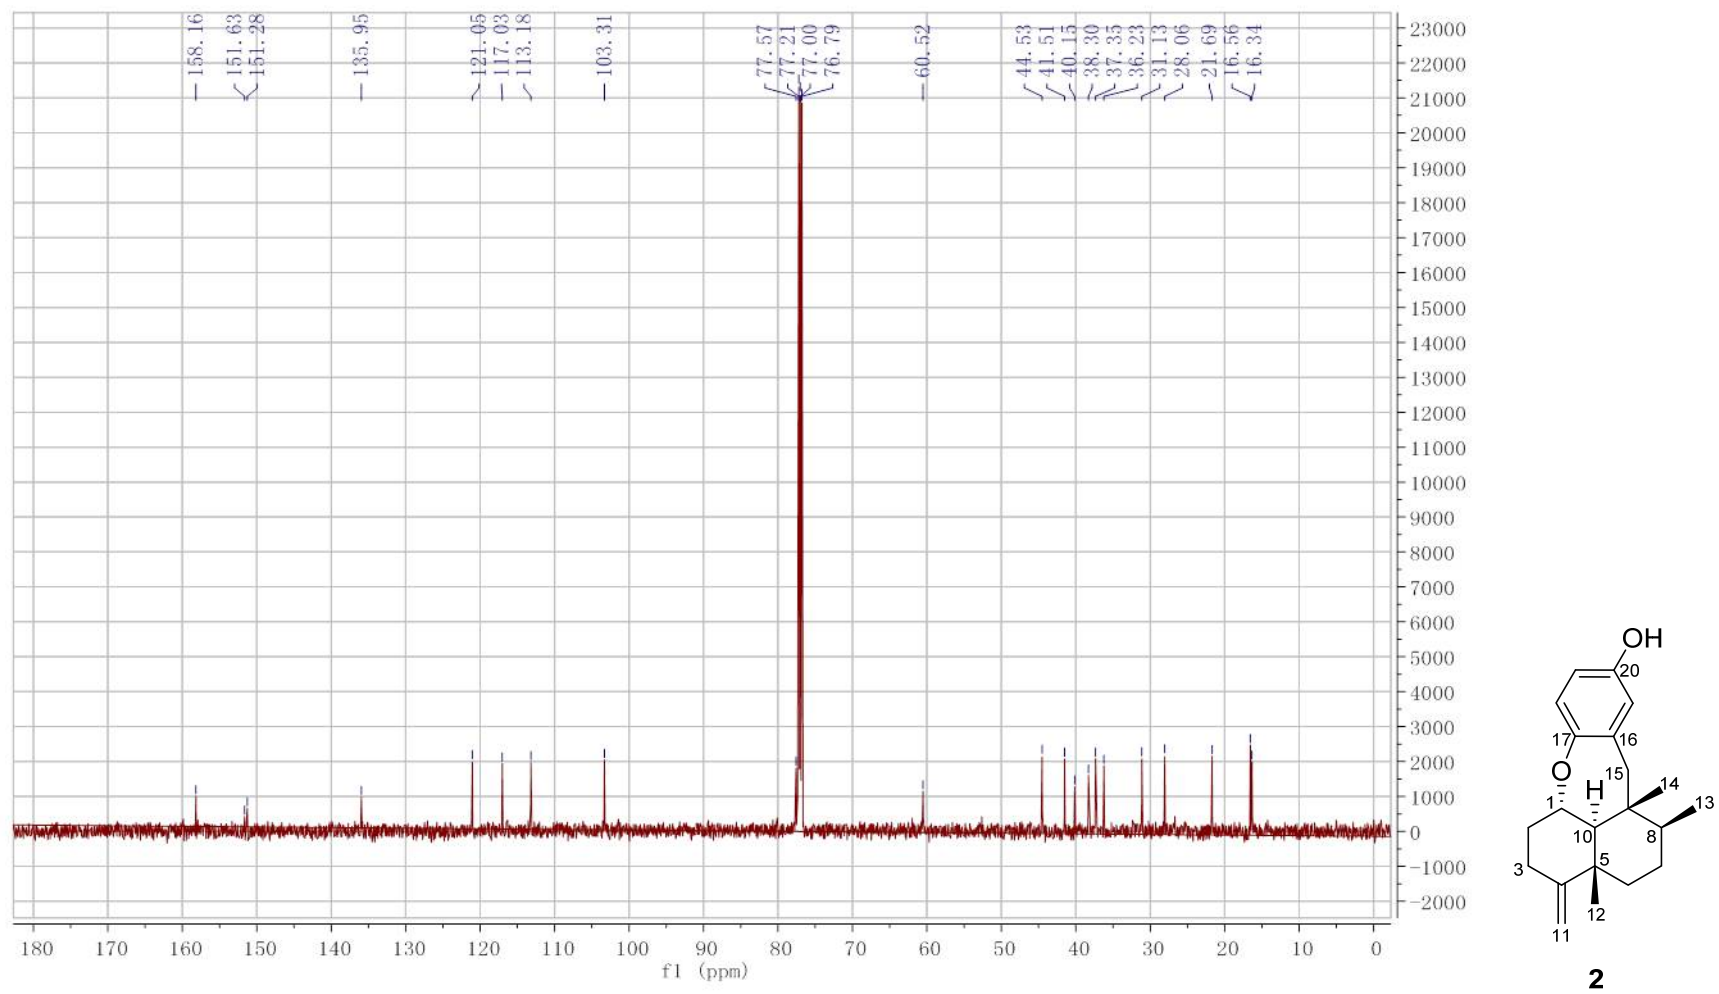

**Figure S13.**  $^{13}\text{C}$  NMR Spectrum of Dysiquinol B (2).

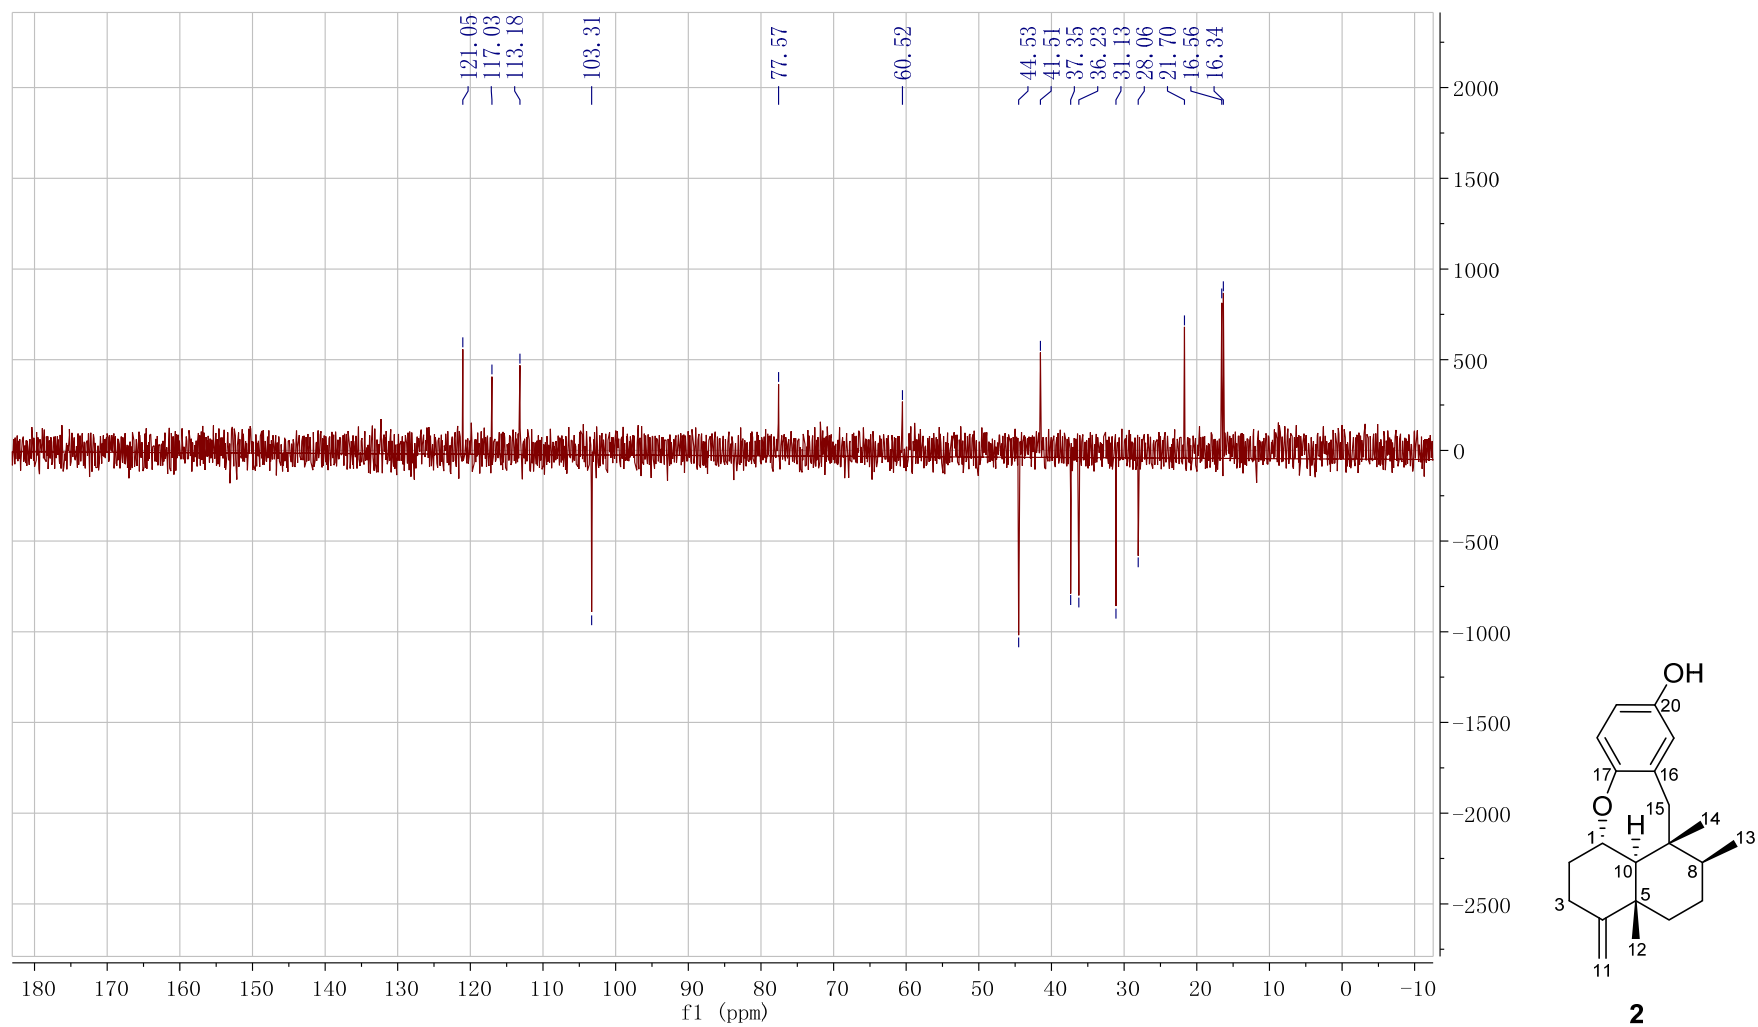

**Figure S14.** DEPT135 Spectrum of Dysiquinol B (2).

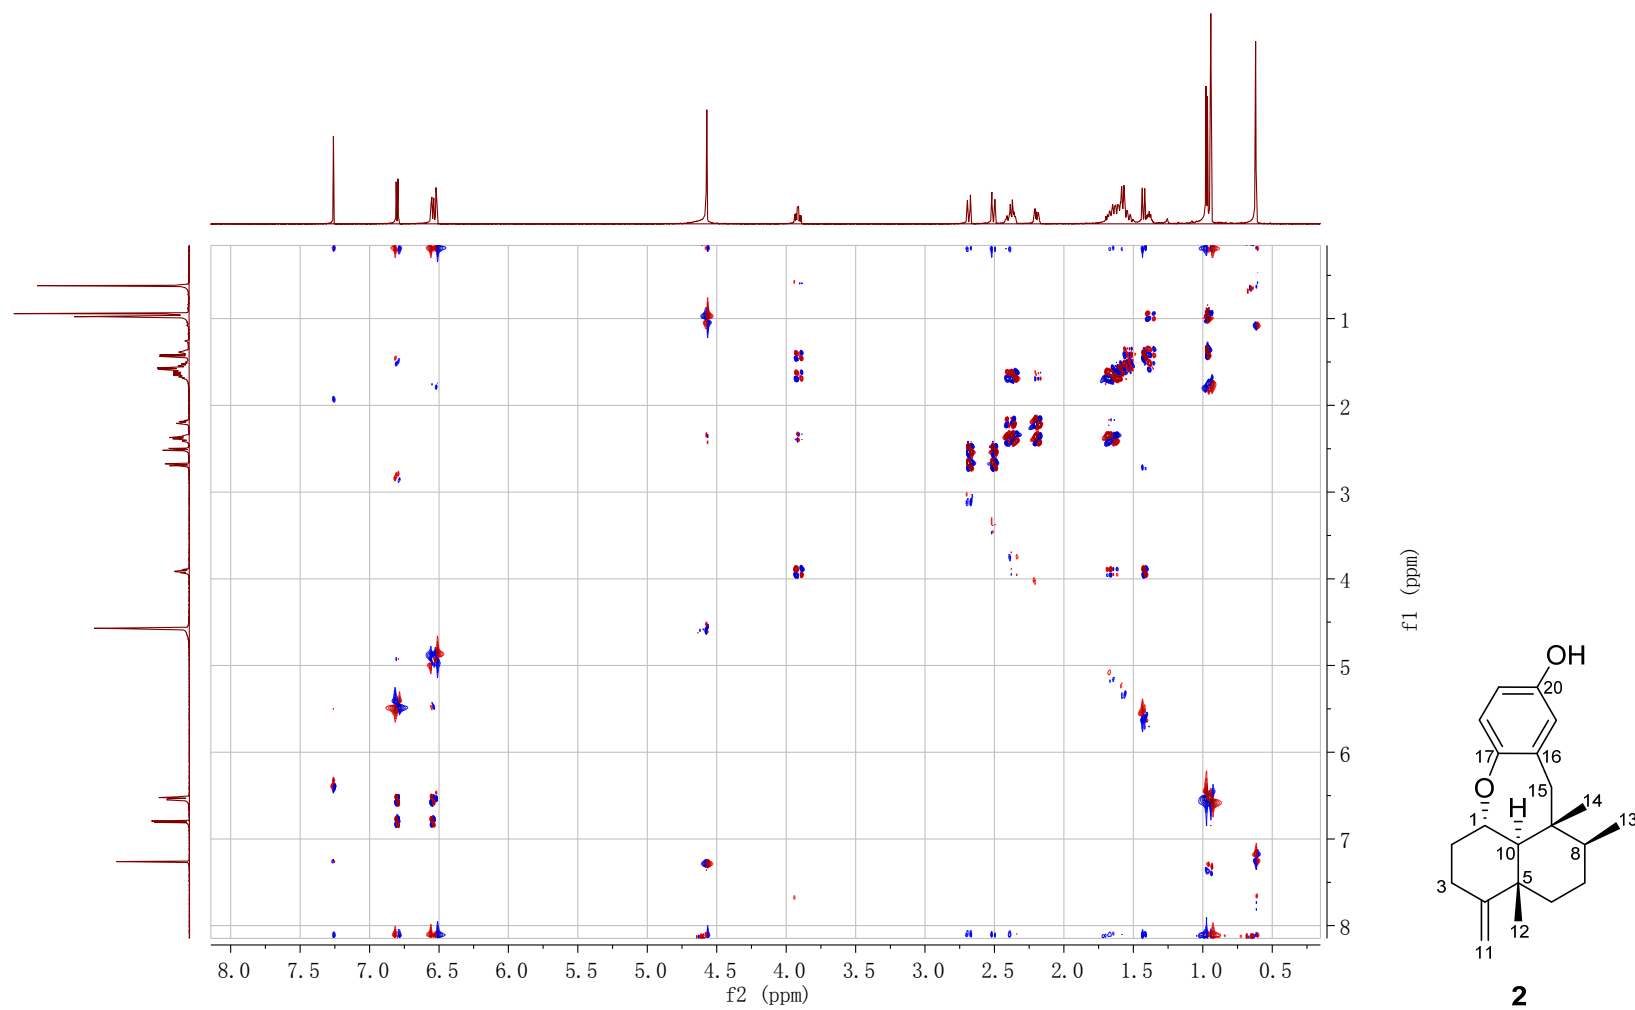

**Figure S15.**  $^1\text{H}$ - $^1\text{H}$  COSY Spectrum of Dysiquinol B (**2**).

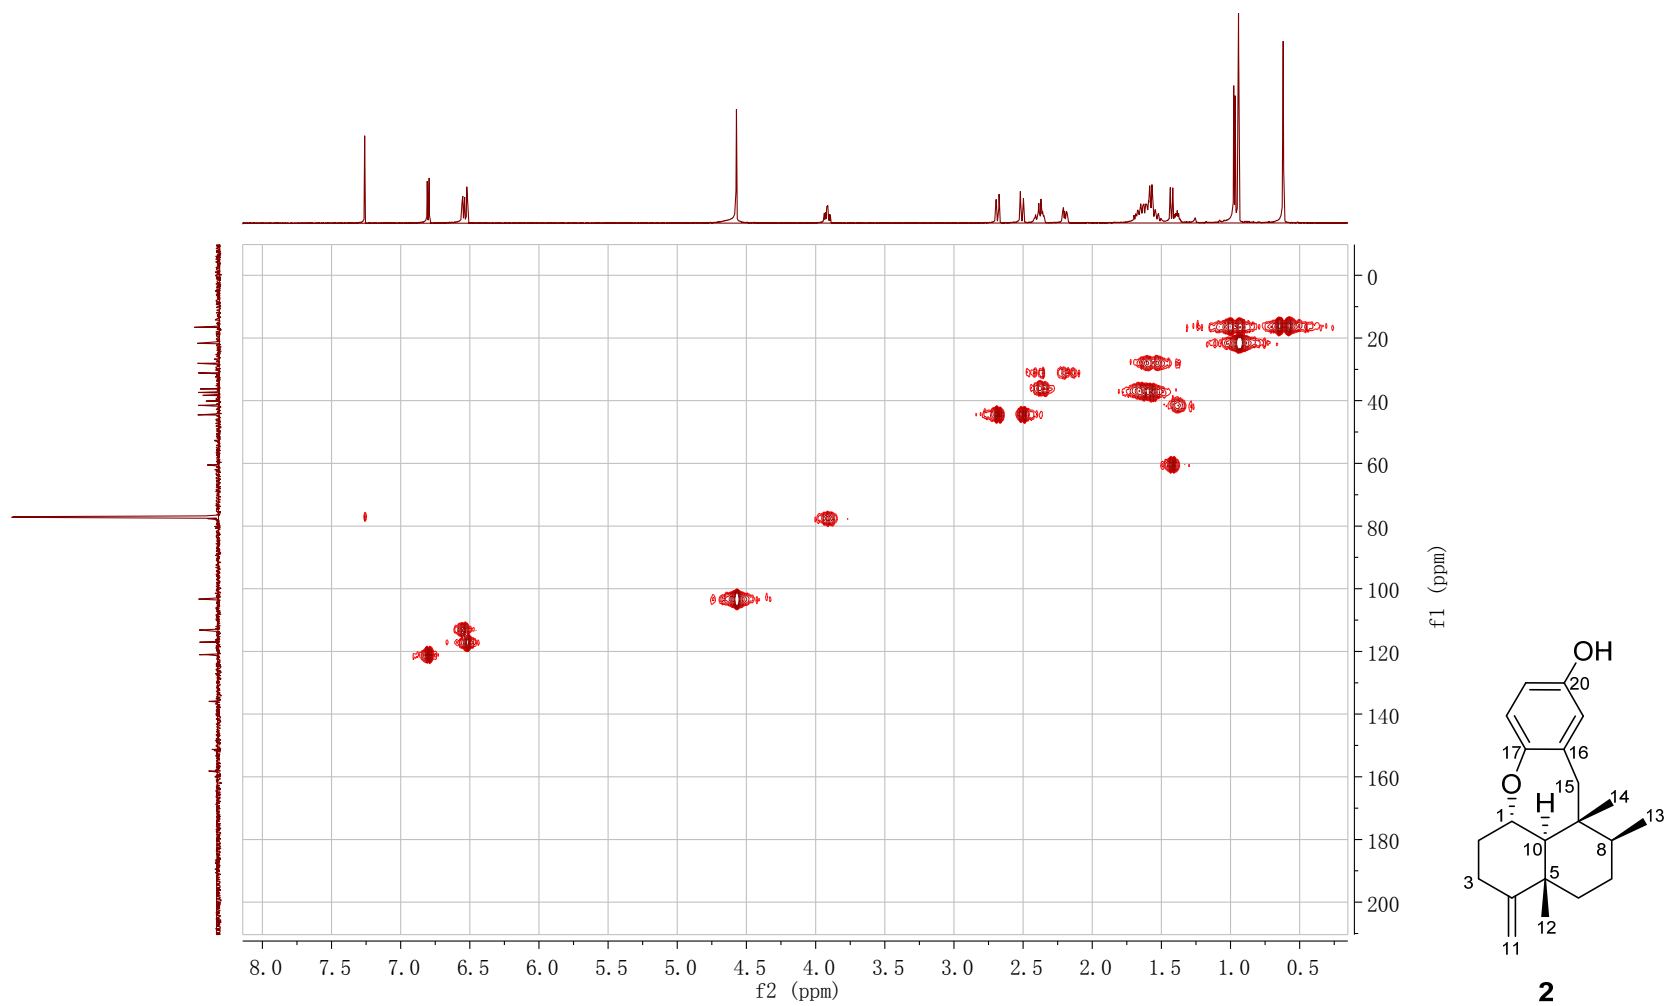

**Figure S16.** HSQC Spectrum of Dysiquinol B (**2**).

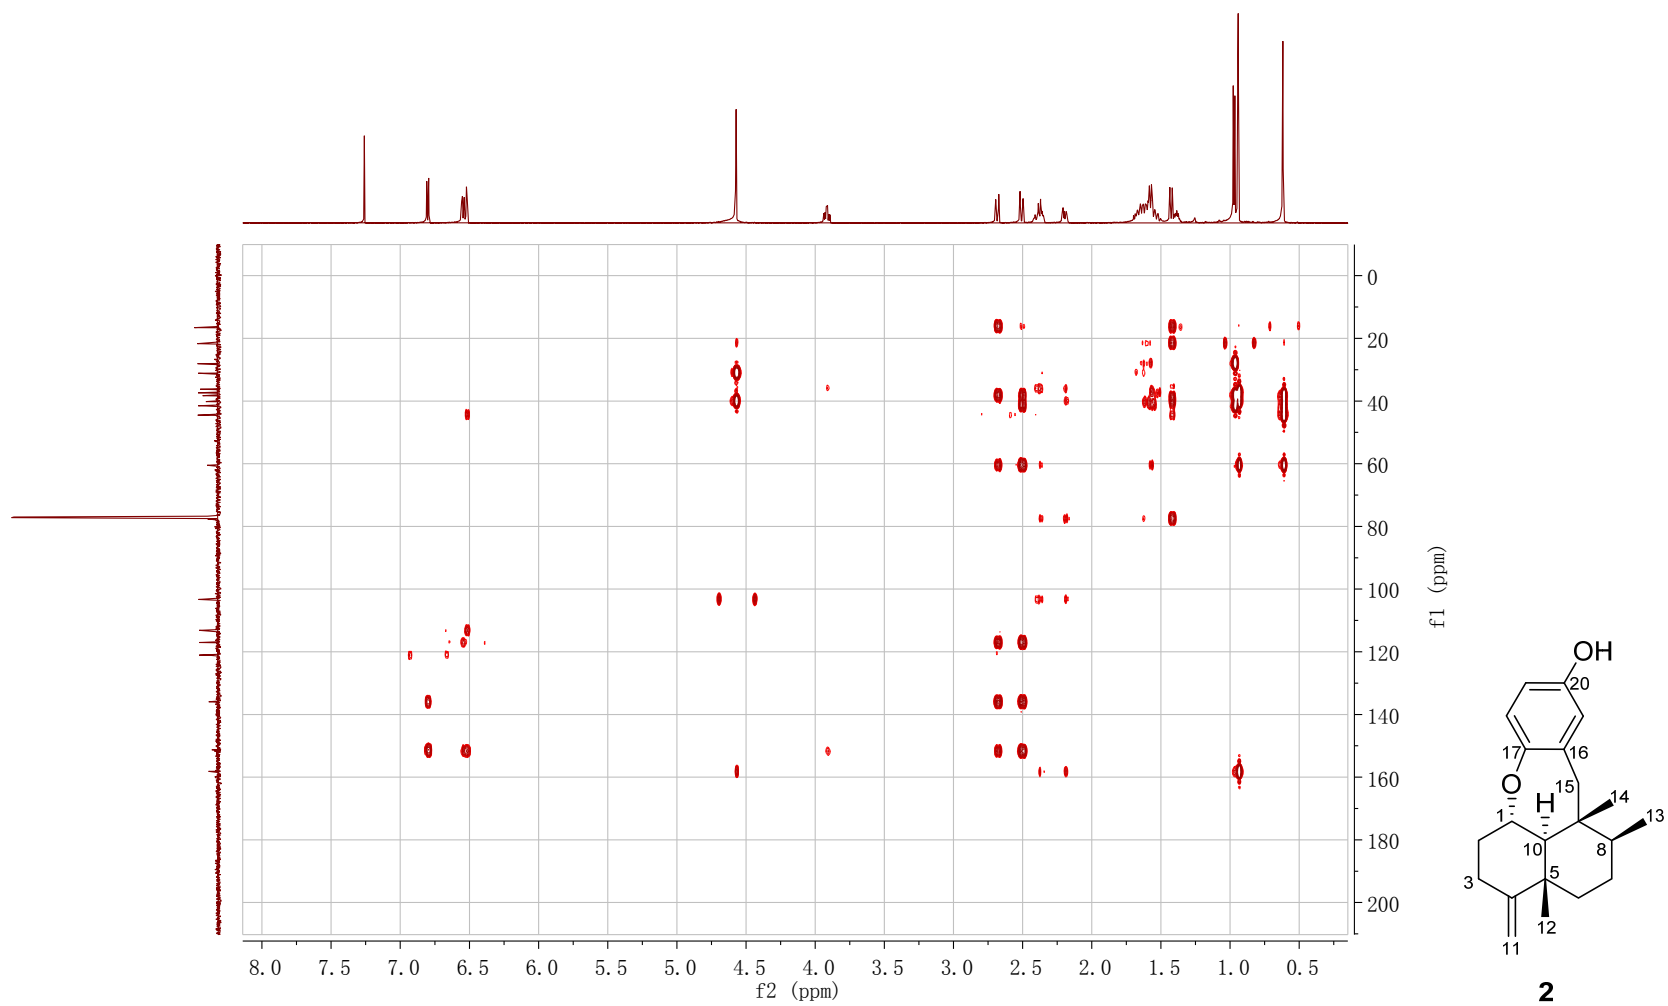

**Figure S17.** HMBC Spectrum of Dysiquinol B (**2**).

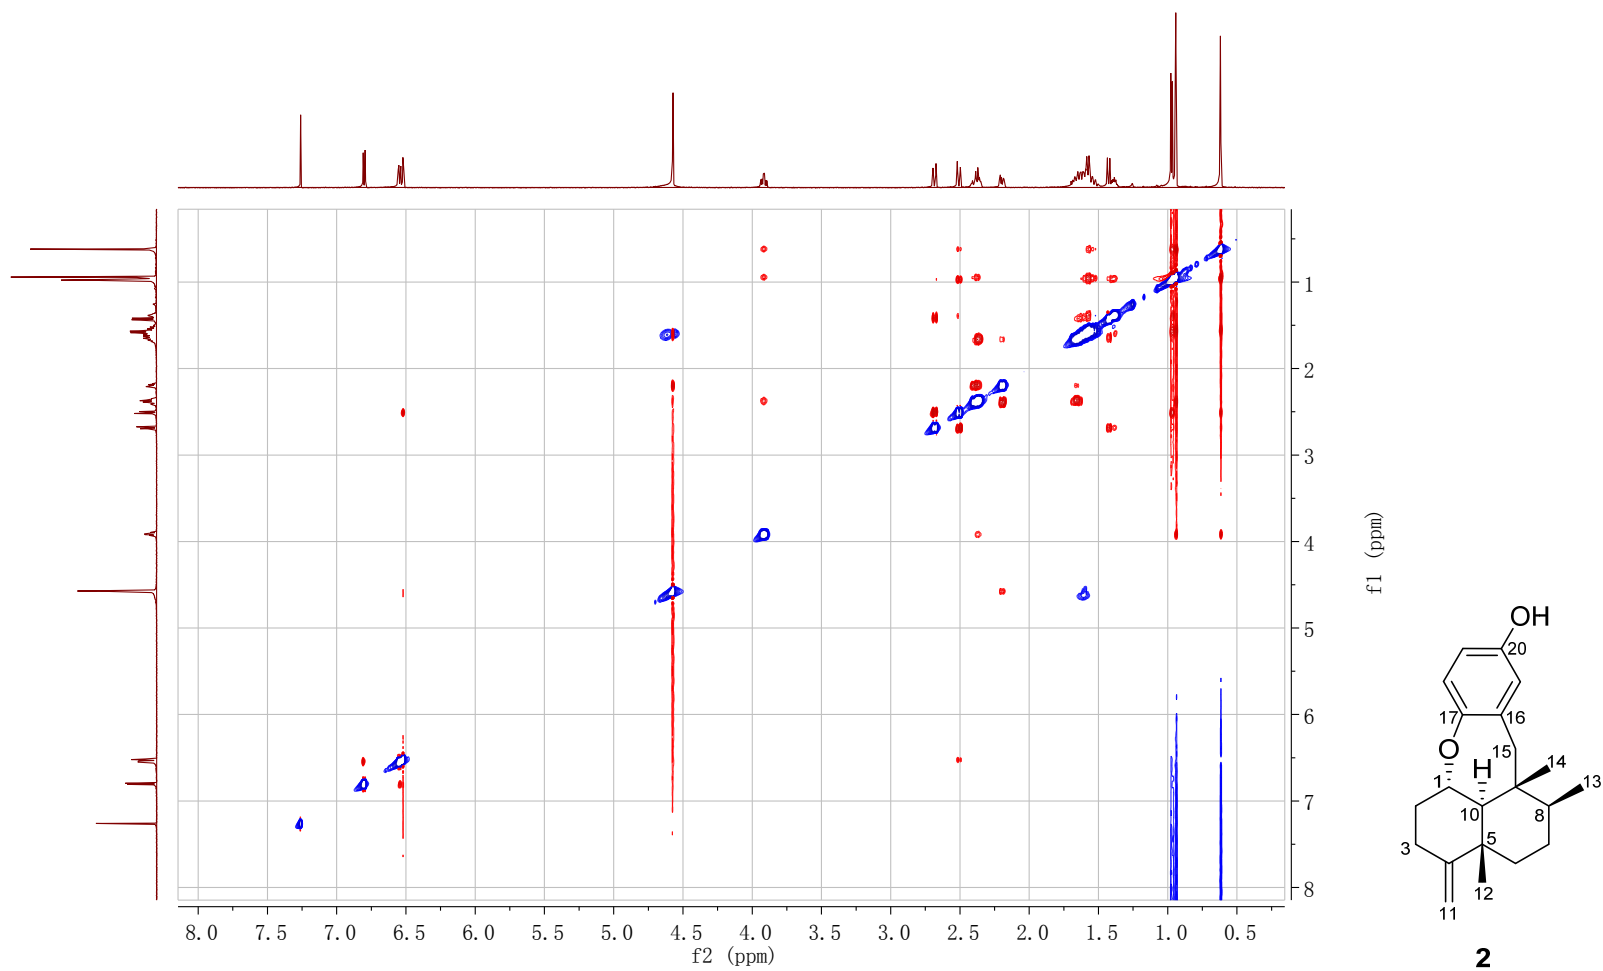

**Figure S18.** NOESY Spectrum of Dysiquinol B (**2**).



Elemental Composition Report *G4E2*

Tolerance = 20.0 PPM / DBE: min = -1.5, max = 50.0  
 Selected filters: None

Monoisotopic Mass, Even Electron Ions  
 14 formula(e) evaluated with 1 results within limits (up to 50 closest results for each mass)

Elements Used:

C: 10-25 H: 10-40 O: 1-6

SIPI

G4E2 M.W=312

WQ12-329H 56 (1.972) AM (Cen,4, 80.00, Ar,5000.0,308.05,0.70); Sm (SG, 2x1.00); Cm (55:64)

Q-ToF micro

YA019

17-Jul-2012,14:21:03

TOF MS ES+  
 1.52e4

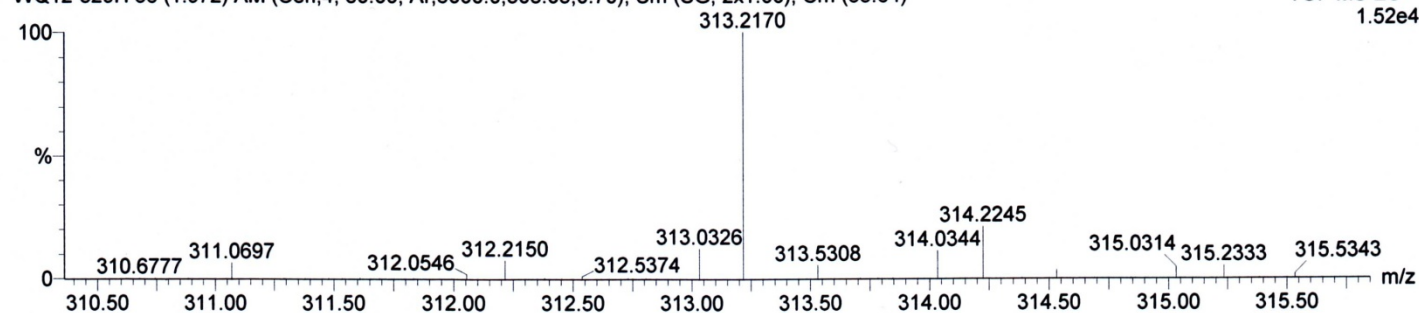

Minimum: 70.00  
 Maximum: 100.00

| Mass     | RA     | Calc. Mass | mDa | PPM | DBE | i-FIT | Formula    |
|----------|--------|------------|-----|-----|-----|-------|------------|
| 313.2170 | 100.00 | 313.2168   | 0.2 | 0.6 | 7.5 | 84.2  | C21 H29 O2 |

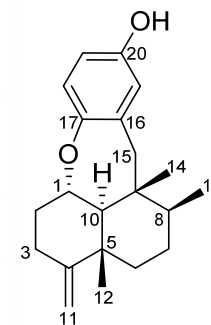

**2**

Figure S19. HRESIMS of Dysiquinol B (2).

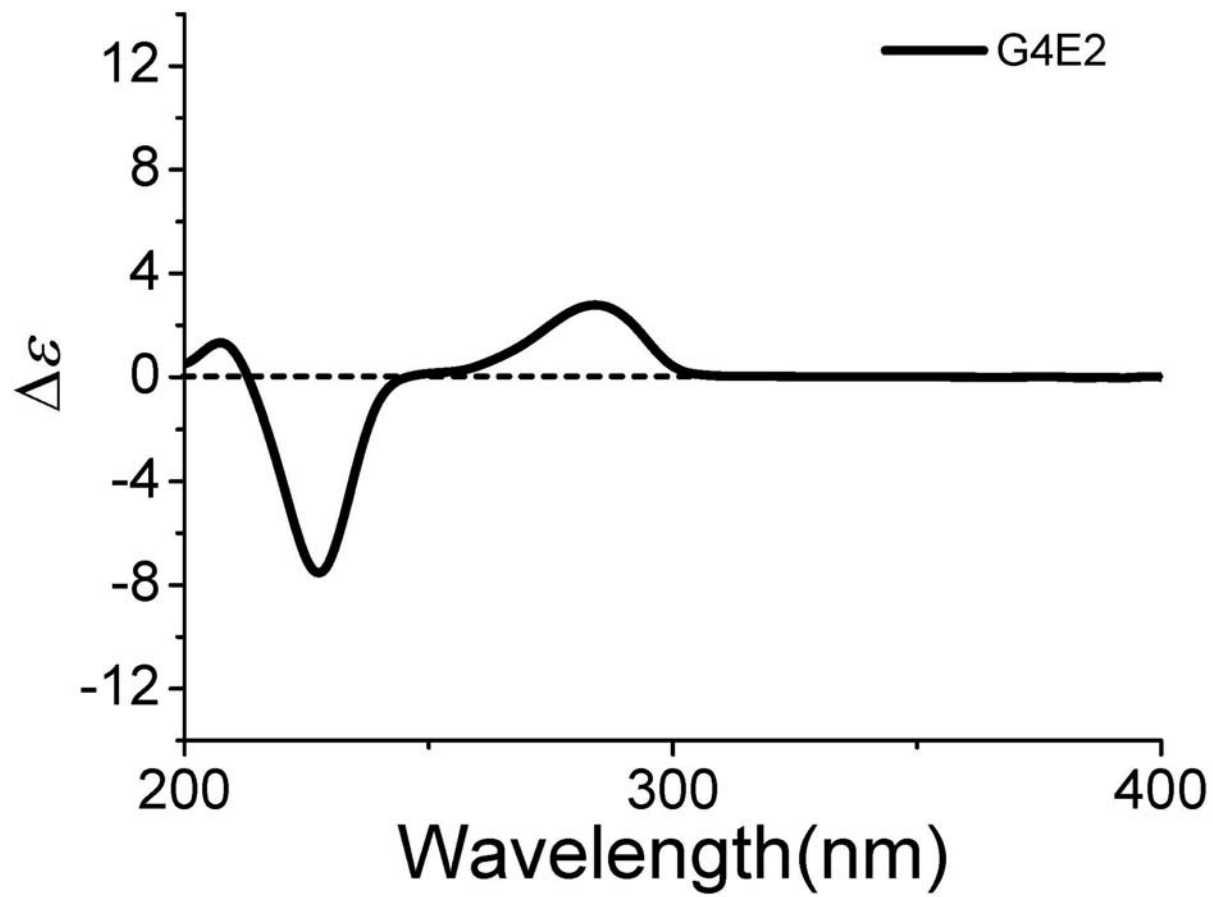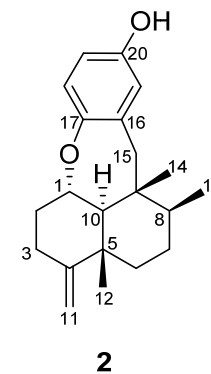

**Figure S20.** CD Spectrum of Dysiquinol B (2) in MeOH.

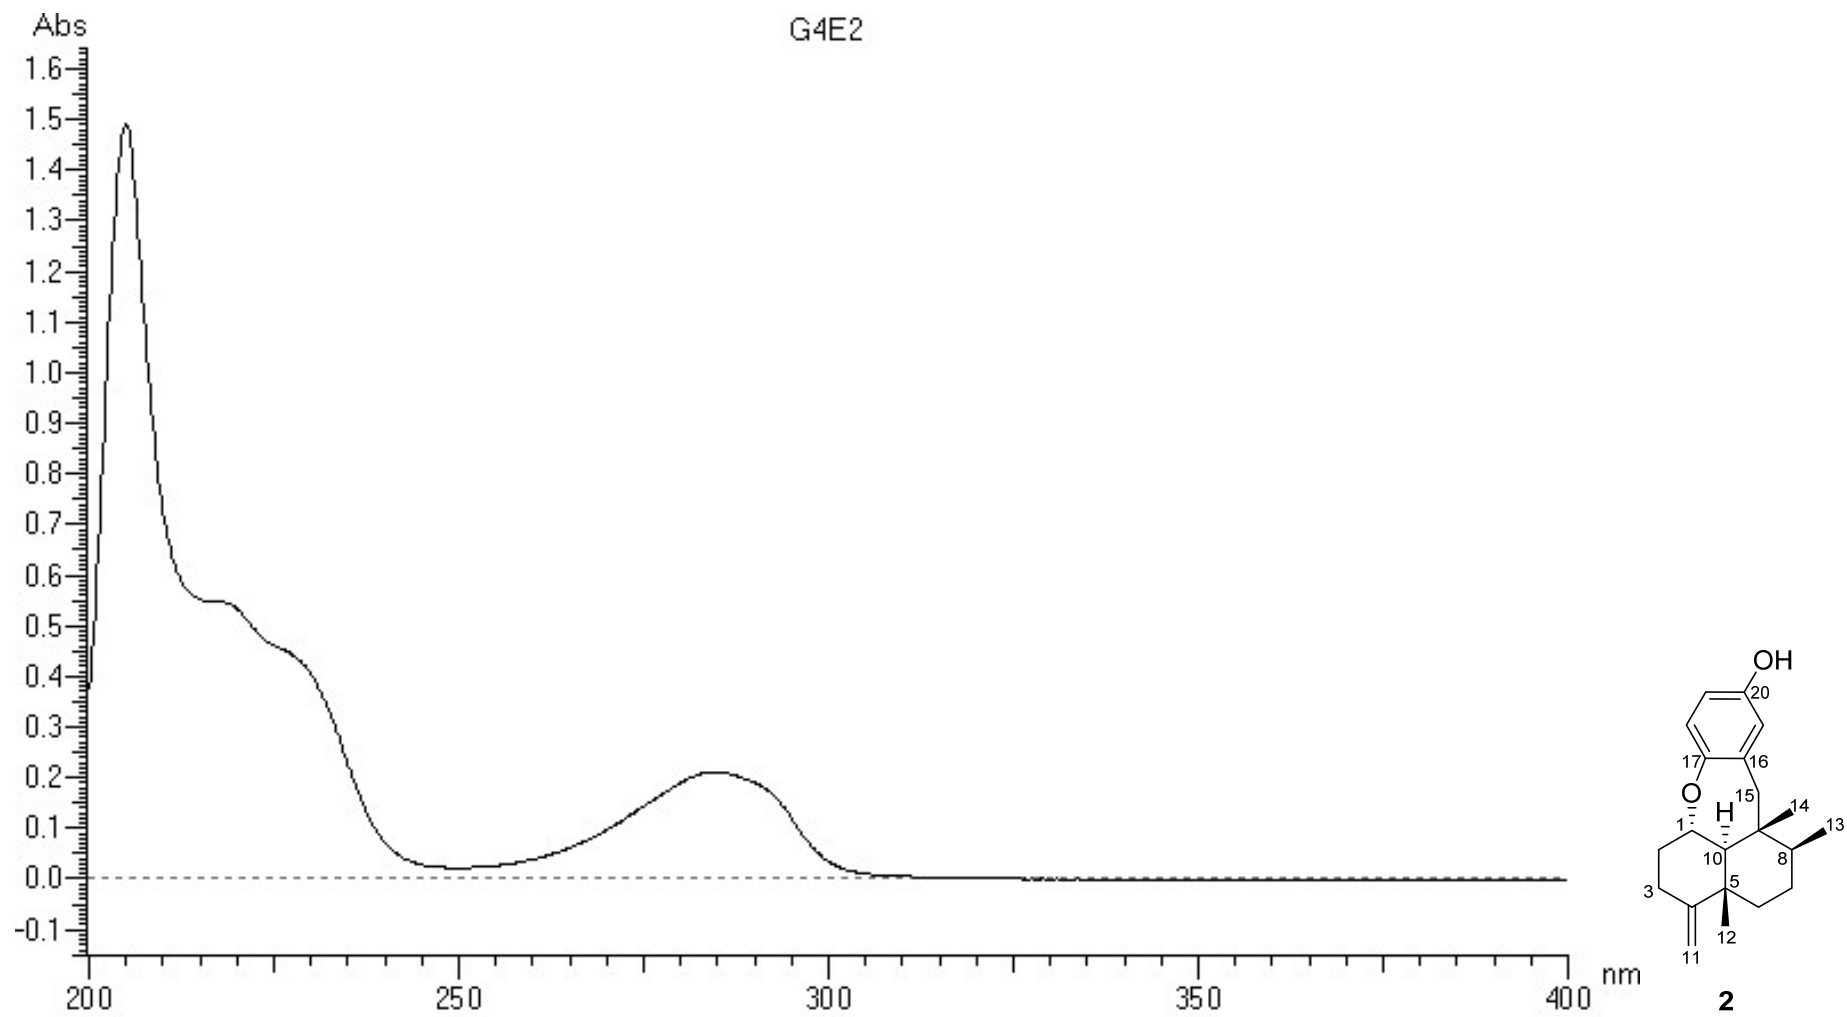

**Figure S21.** UV Spectrum of Dysiquinol B (**2**).

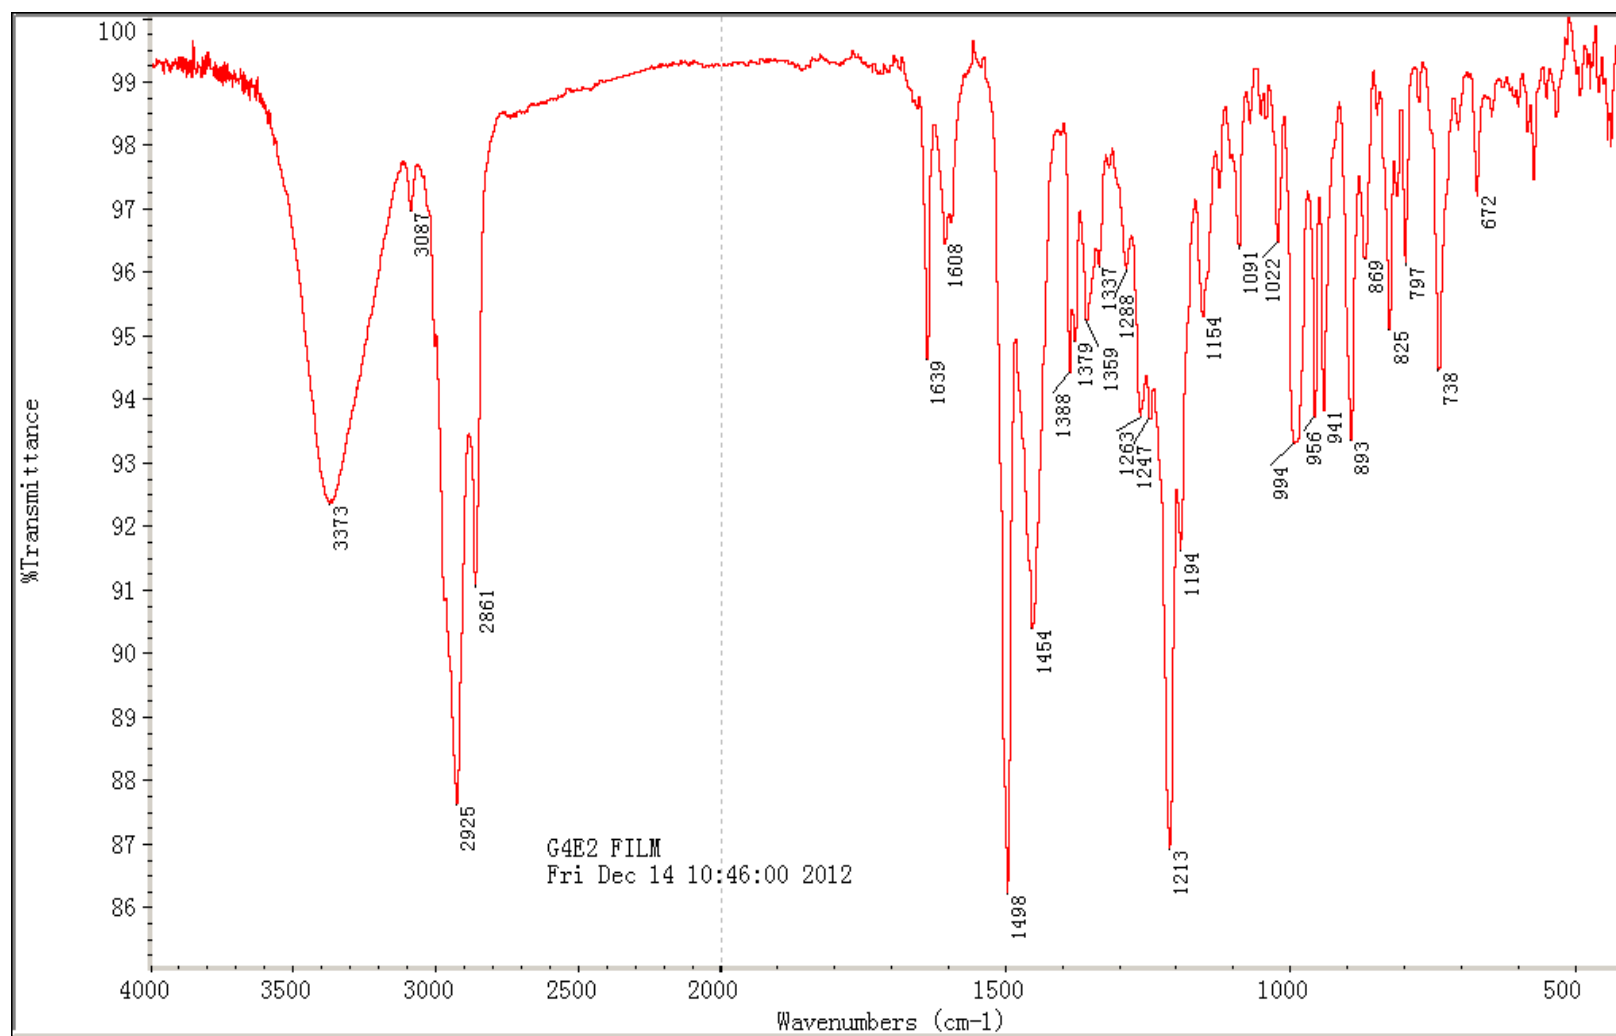

Figure S22. IR Spectrum of Dysiquinol B (2).

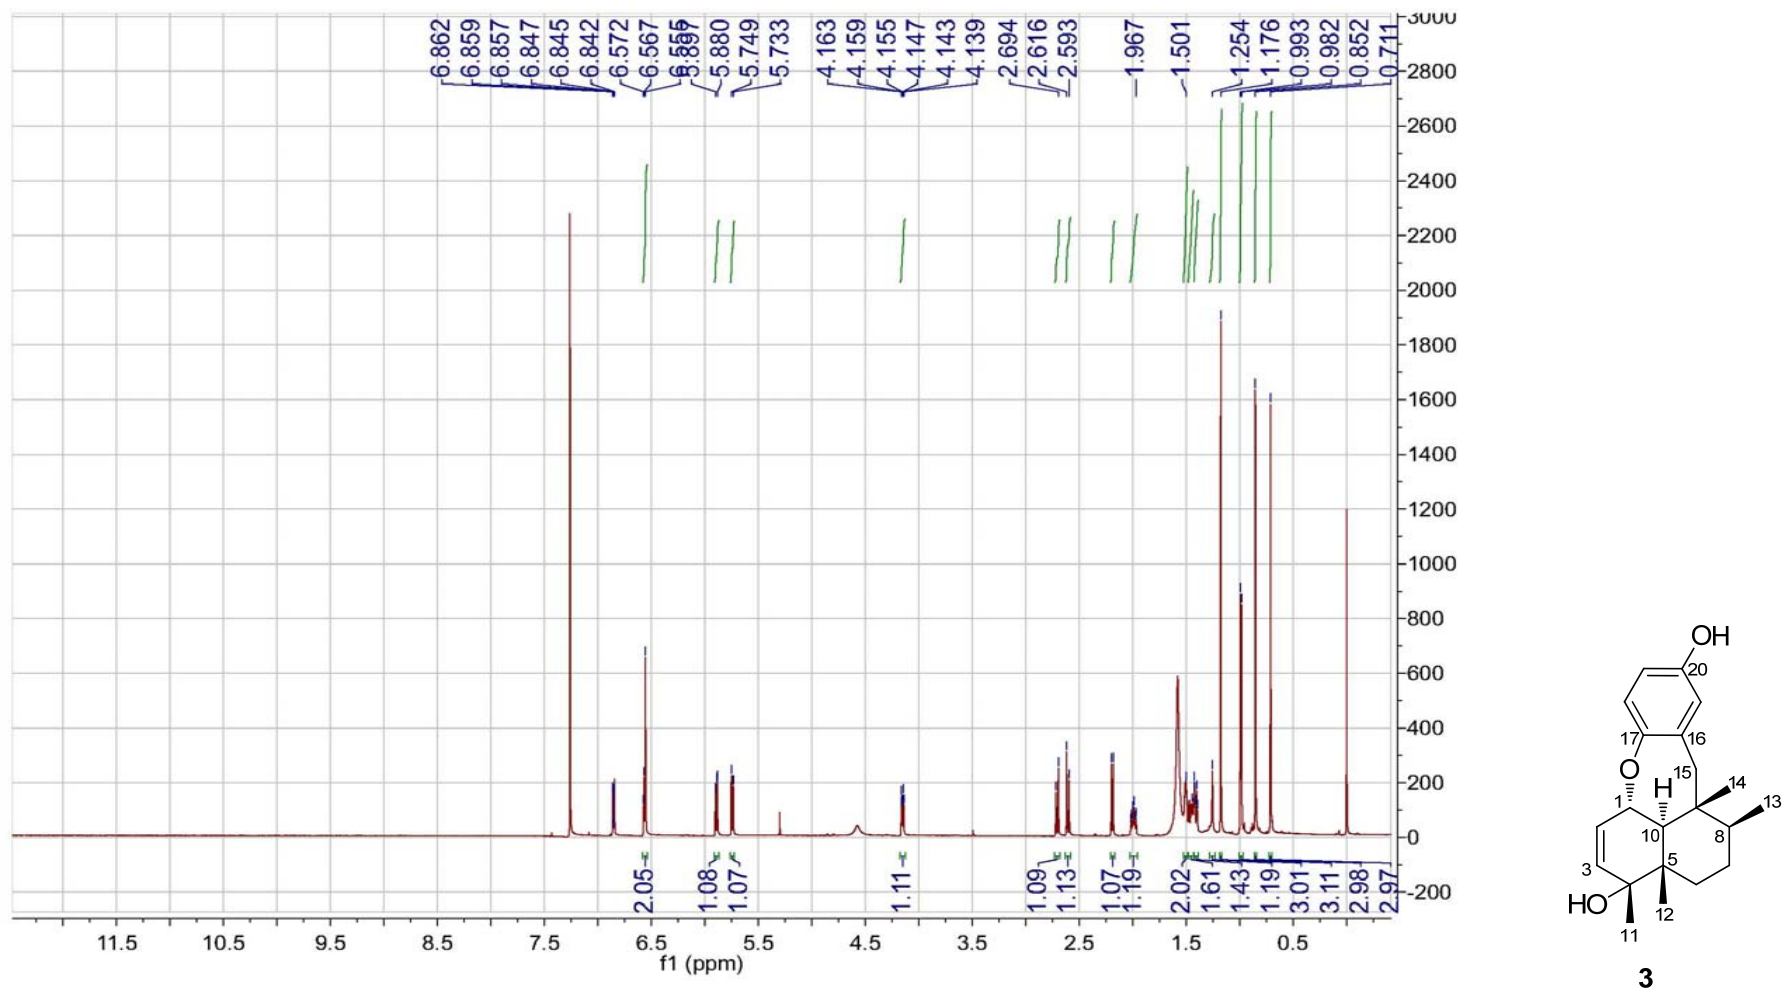

**Figure S23.** <sup>1</sup>H NMR Spectrum of Dysiquinol C (**3**) in CDCl<sub>3</sub>.

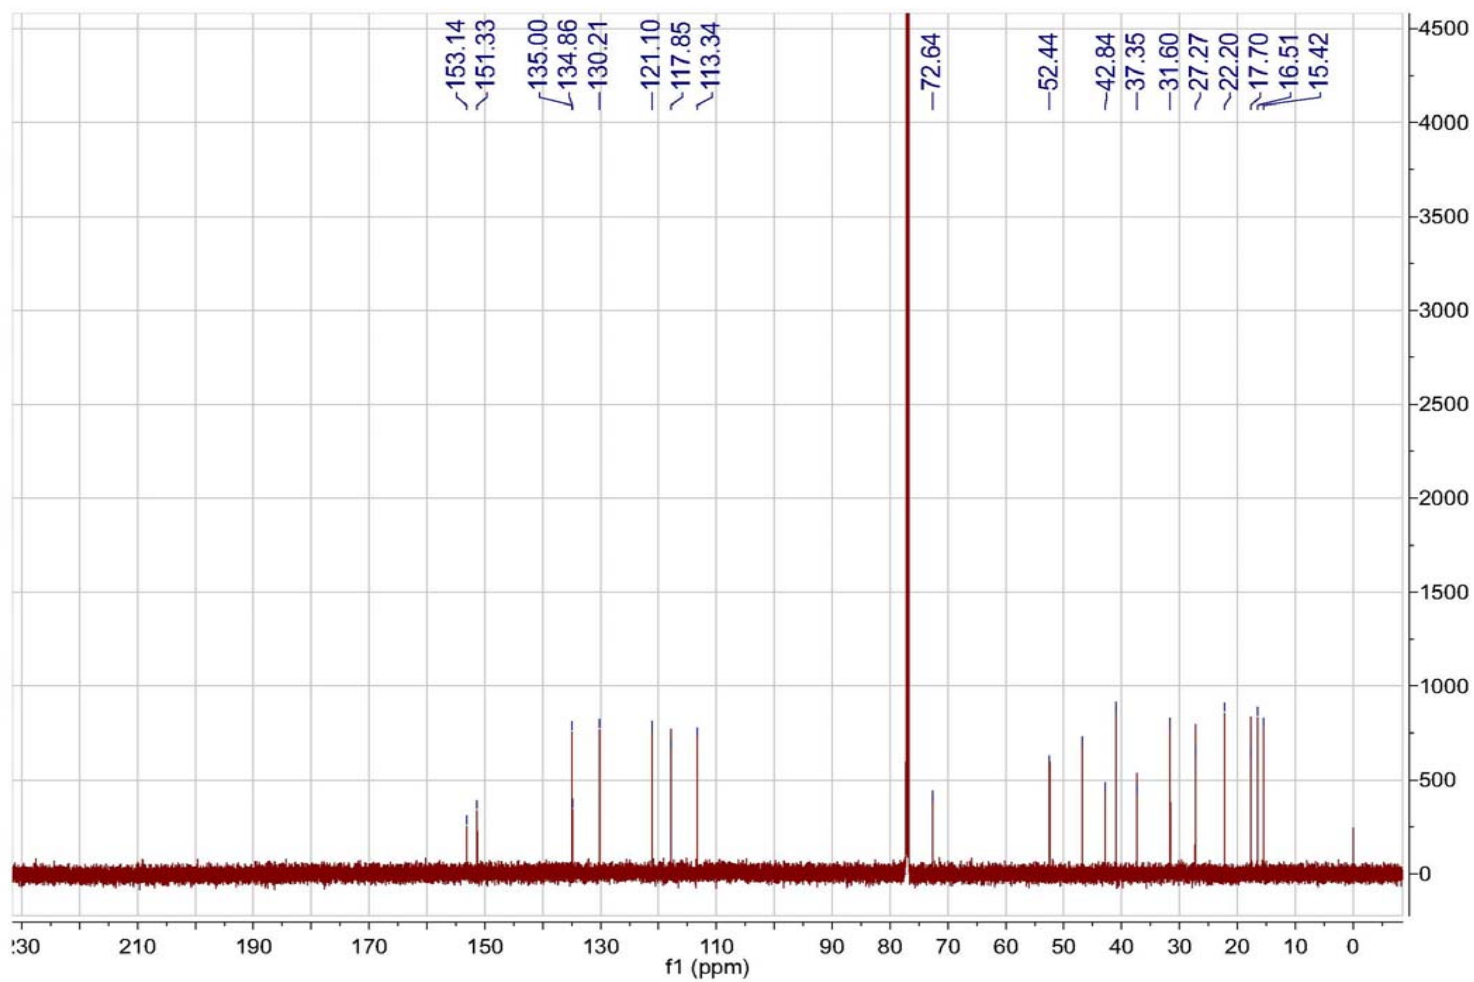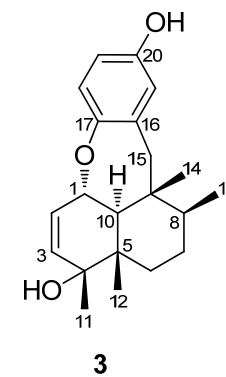

**Figure S24.**  $^{13}\text{C}$  NMR Spectrum of Dysiquinol C (**3**) in  $\text{CDCl}_3$ .

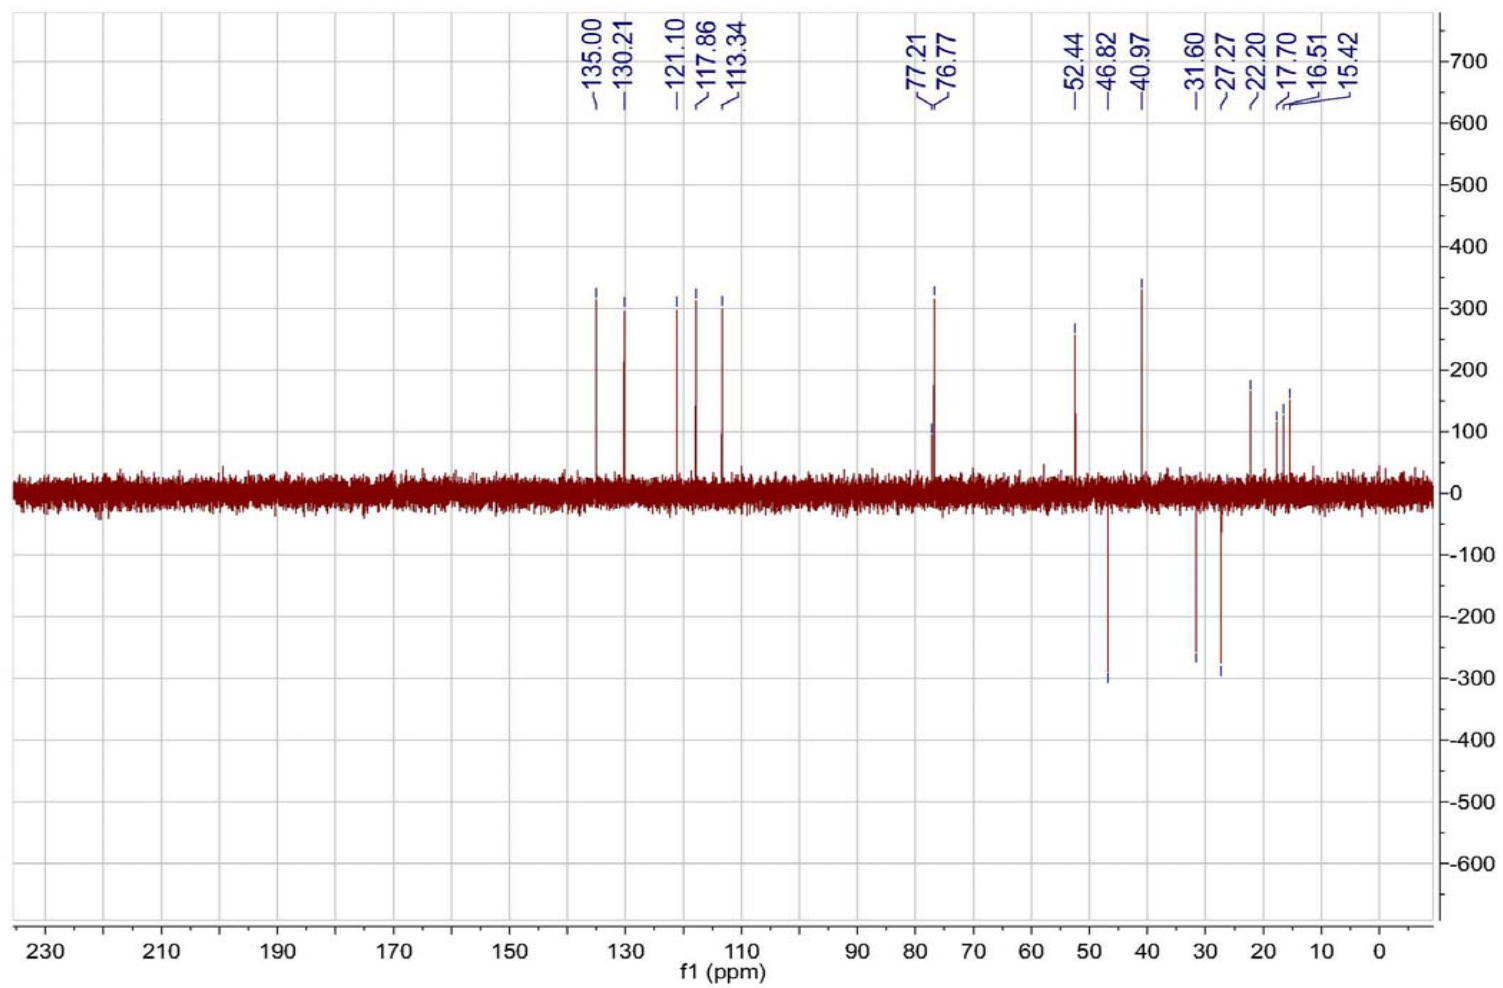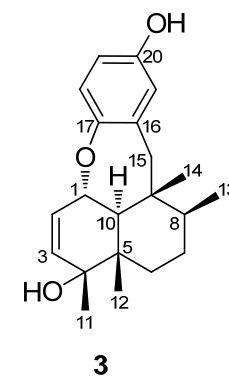

**Figure S25.** DEPT135 Spectrum of Dysiquinol C (**3**) in CDCl<sub>3</sub>.

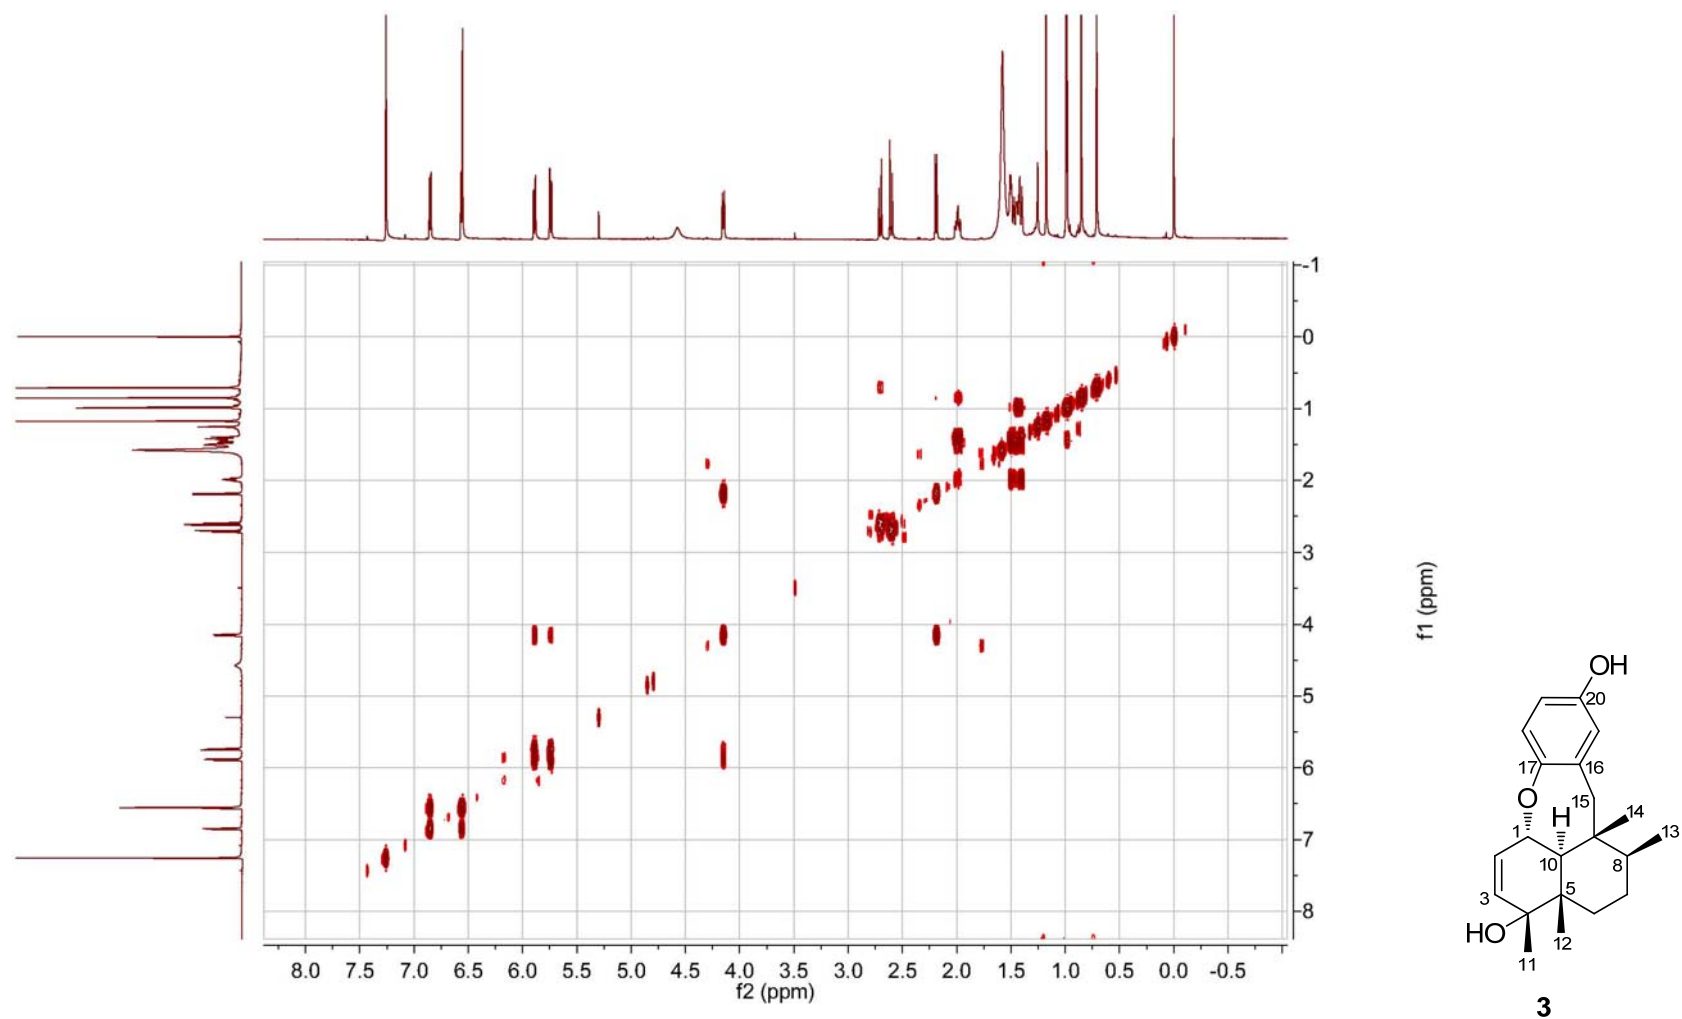

**Figure S26.**  $^1\text{H}$ - $^1\text{H}$  COSY Spectrum of Dysiquinol C (**3**) in  $\text{CDCl}_3$ .



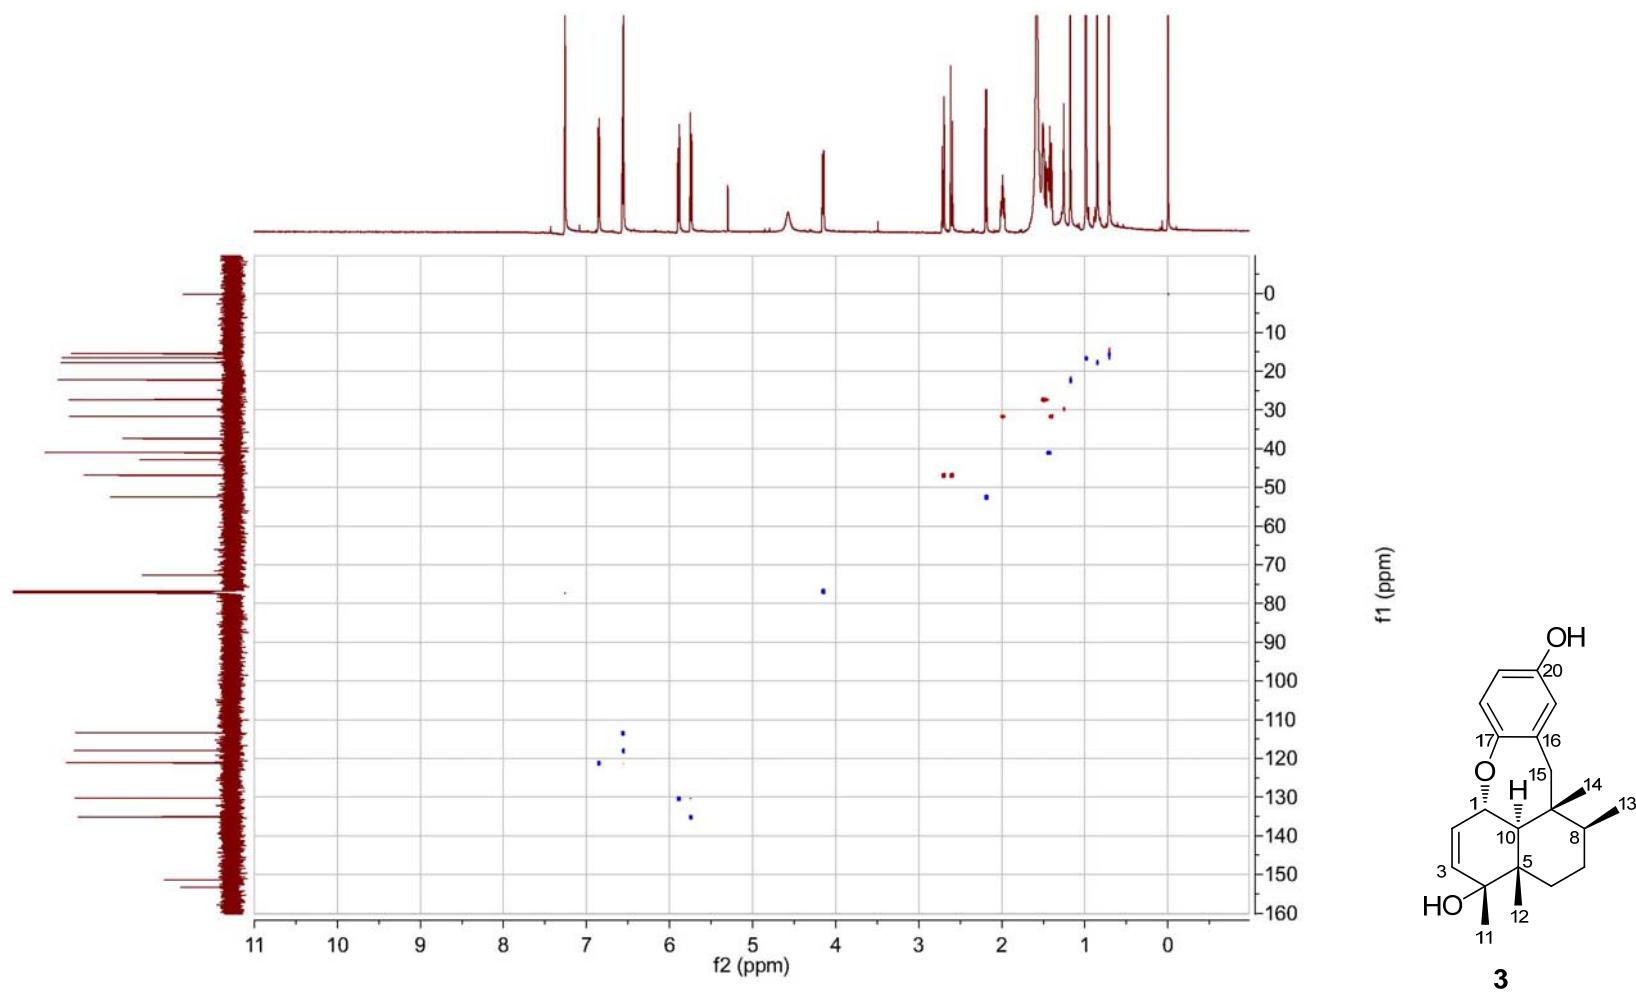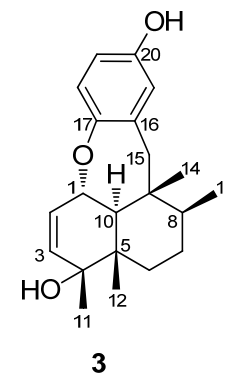

**Figure S27.** HSQC Spectrum of Dysiquinol C (**3**) in CDCl<sub>3</sub>.

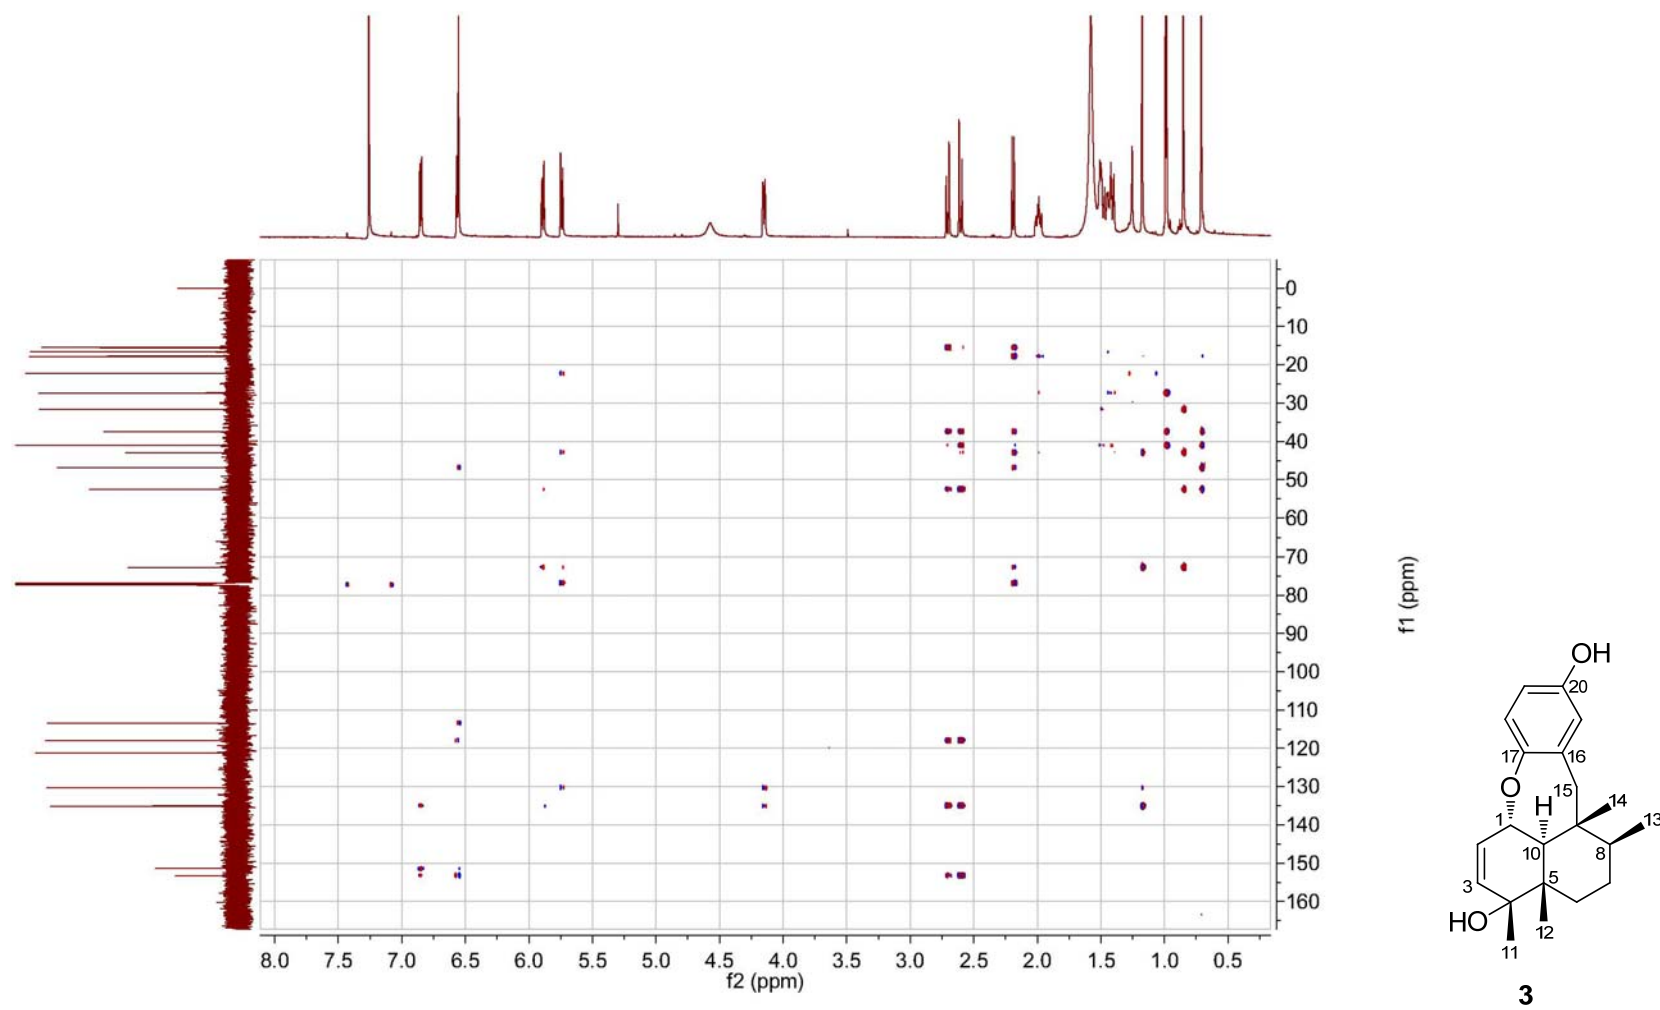

**Figure S28.** HMBC Spectrum of Dysiquinol C (**3**) in  $\text{CDCl}_3$ .

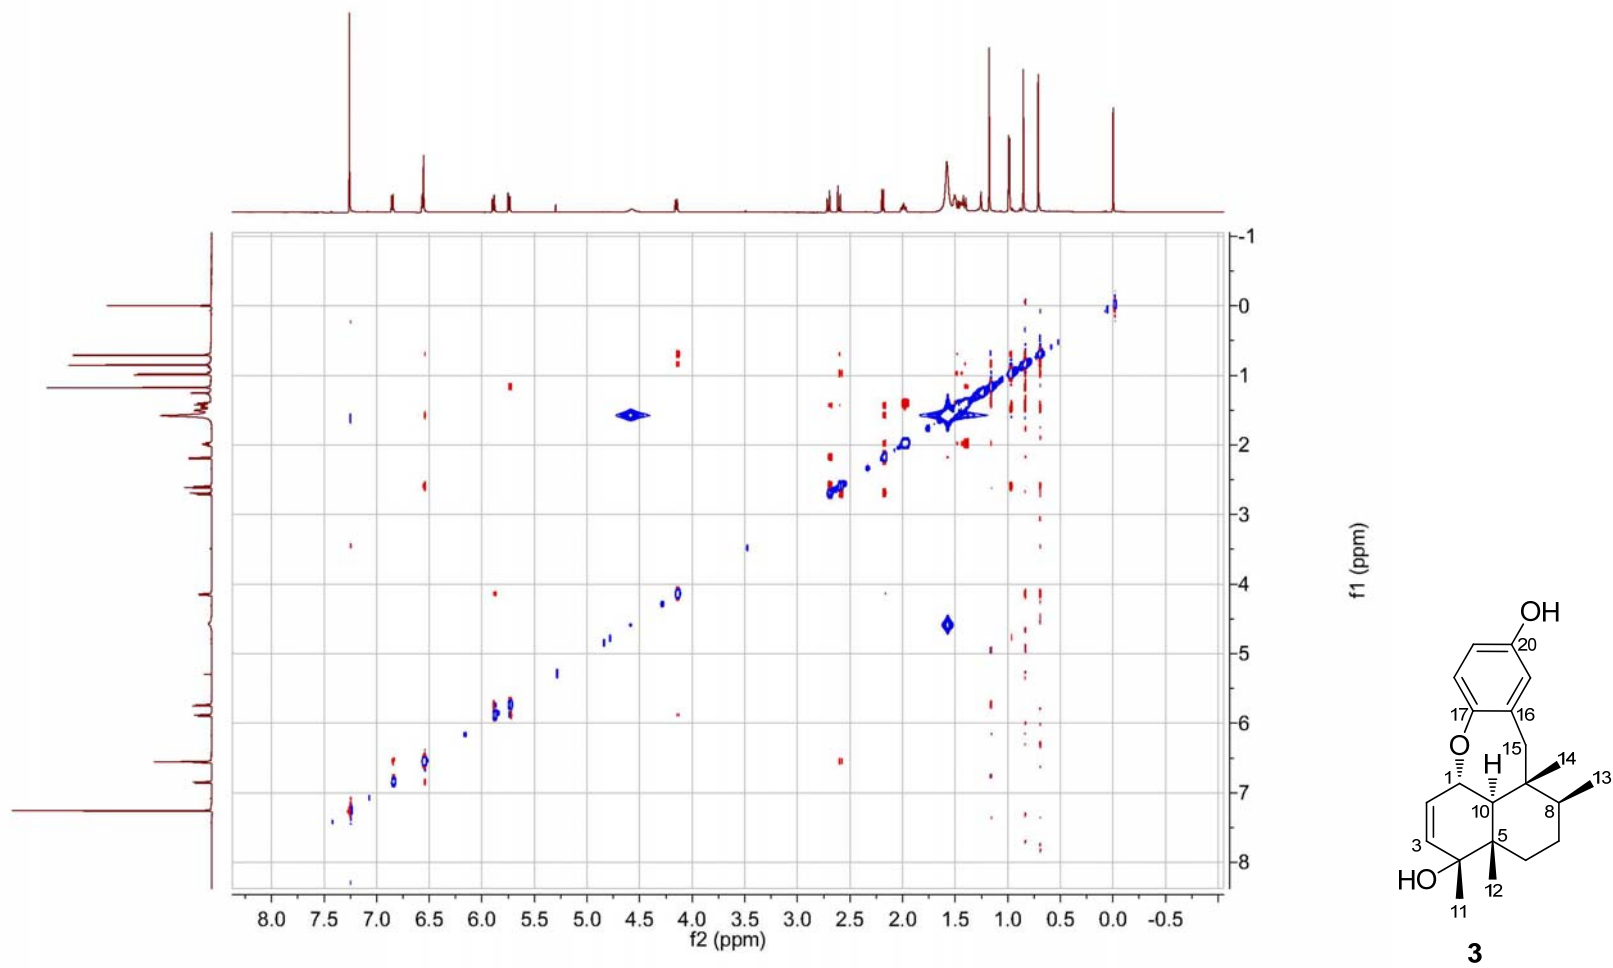

**Figure S29.** NOESY Spectrum of Dysiquinol C (**3**) in CDCl<sub>3</sub>.

## Elemental Composition Report

Page 1

### Multiple Mass Analysis: 2 mass(es) processed

Tolerance = 10.0 PPM / DBE: min = -10.0, max = 50.0

Selected filters: None

Monoisotopic Mass, Even Electron Ions

15 formula(e) evaluated with 1 results within limits (up to 50 closest results for each mass)

Elements Used:

C: 5-25 H: 5-40 O: 1-5 Na: 1-1

SIPI

DM-5C-1

WQ14-371H1 14 (0.494) AM (Cen,4, 80.00, Ar,5000.0,347.14,0.70); Sm (SG, 2x3.00); Cm (14:26)

16:41:27,15-Dec-2014

TOF MS ES+  
1.44e4

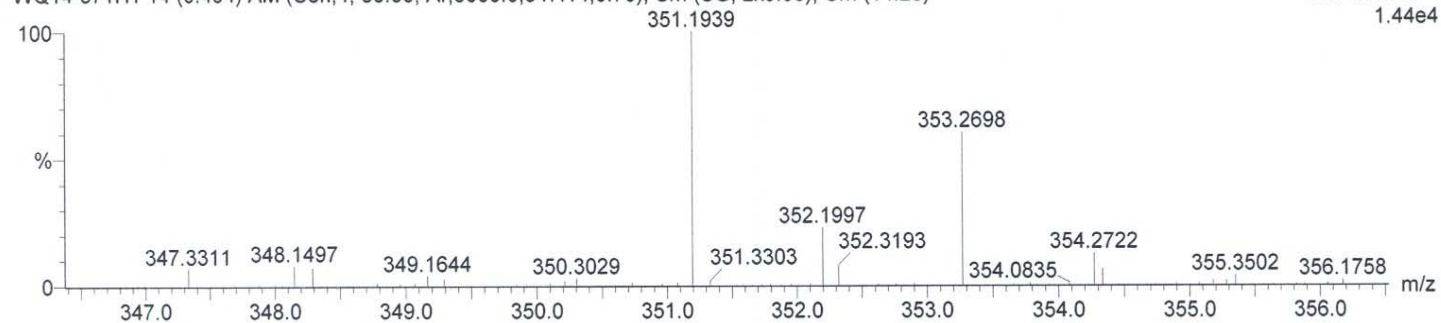

Minimum: 65.00  
Maximum: 100.00

| Mass     | RA     | Calc. Mass | mDa | PPM | DBE | i-FIT  | Formula       |
|----------|--------|------------|-----|-----|-----|--------|---------------|
| 351.1939 | 100.00 | 351.1936   | 0.3 | 0.9 | 7.5 | 4802.6 | C21 H28 O3 Na |

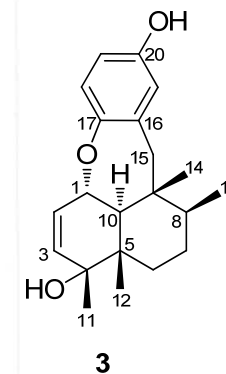

Figure S30. HRESIMS of Dysiquinol C (3).

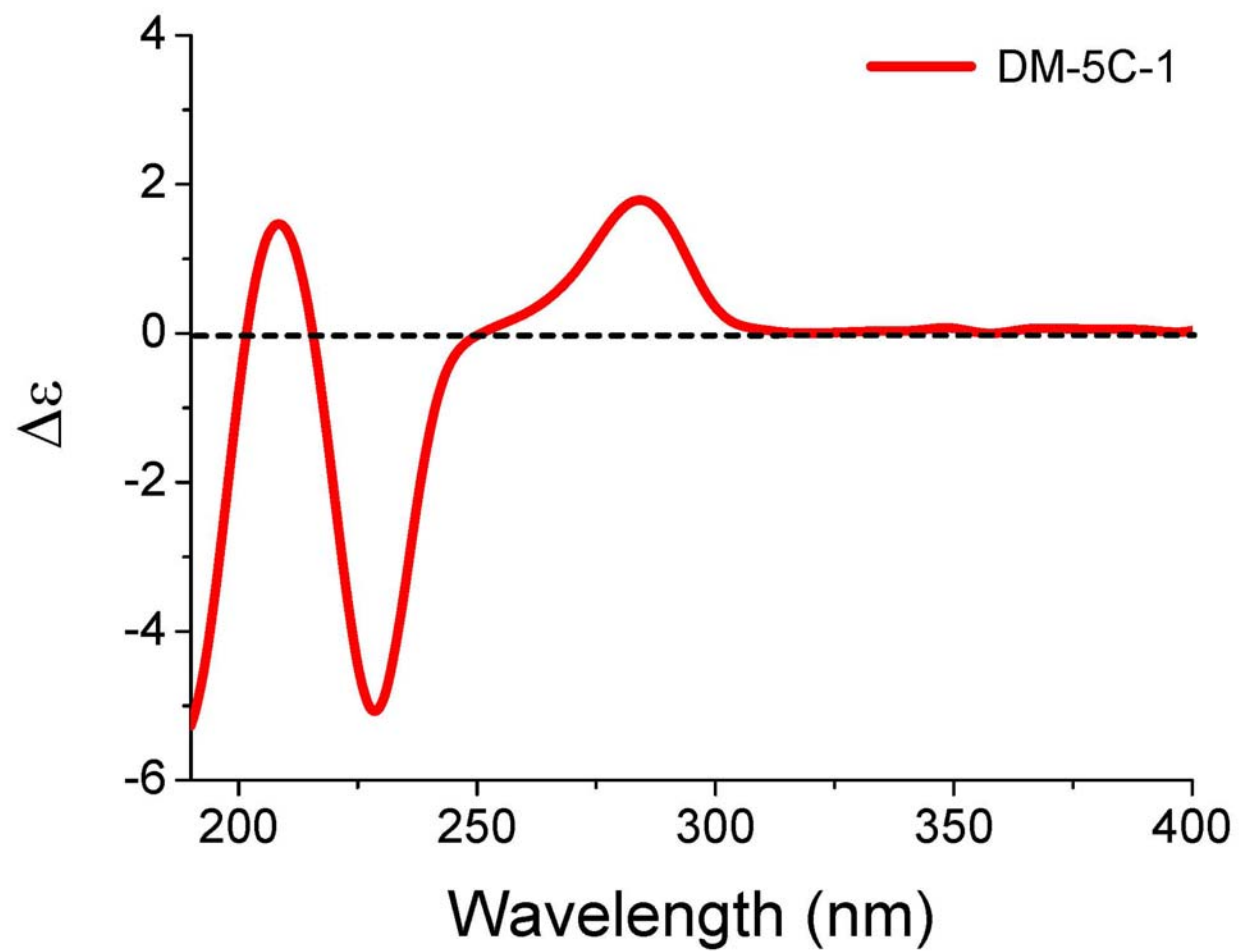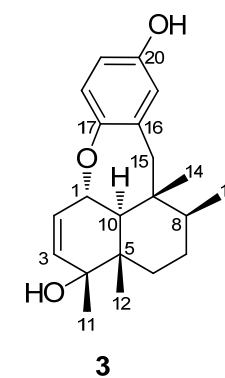

**Figure S31.** CD Spectrum of Dysiquinol C (**3**) in MeOH.

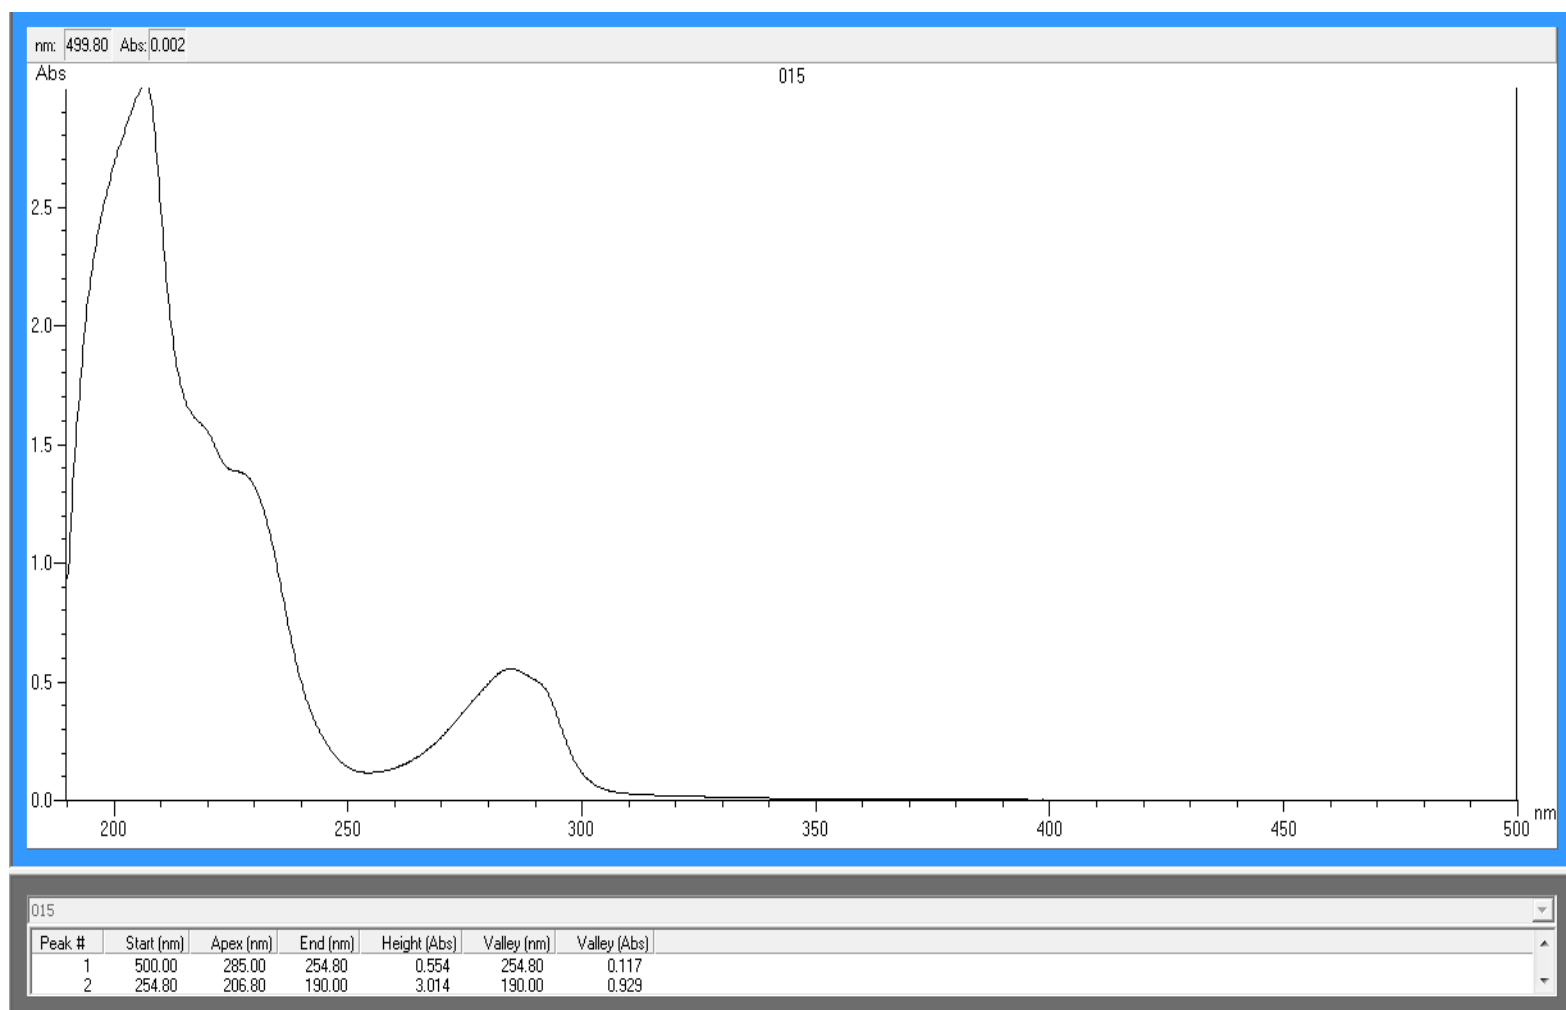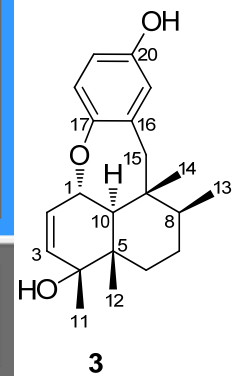

**Figure S32.** UV Spectrum of Dysiquinol C (**3**) in MeOH.

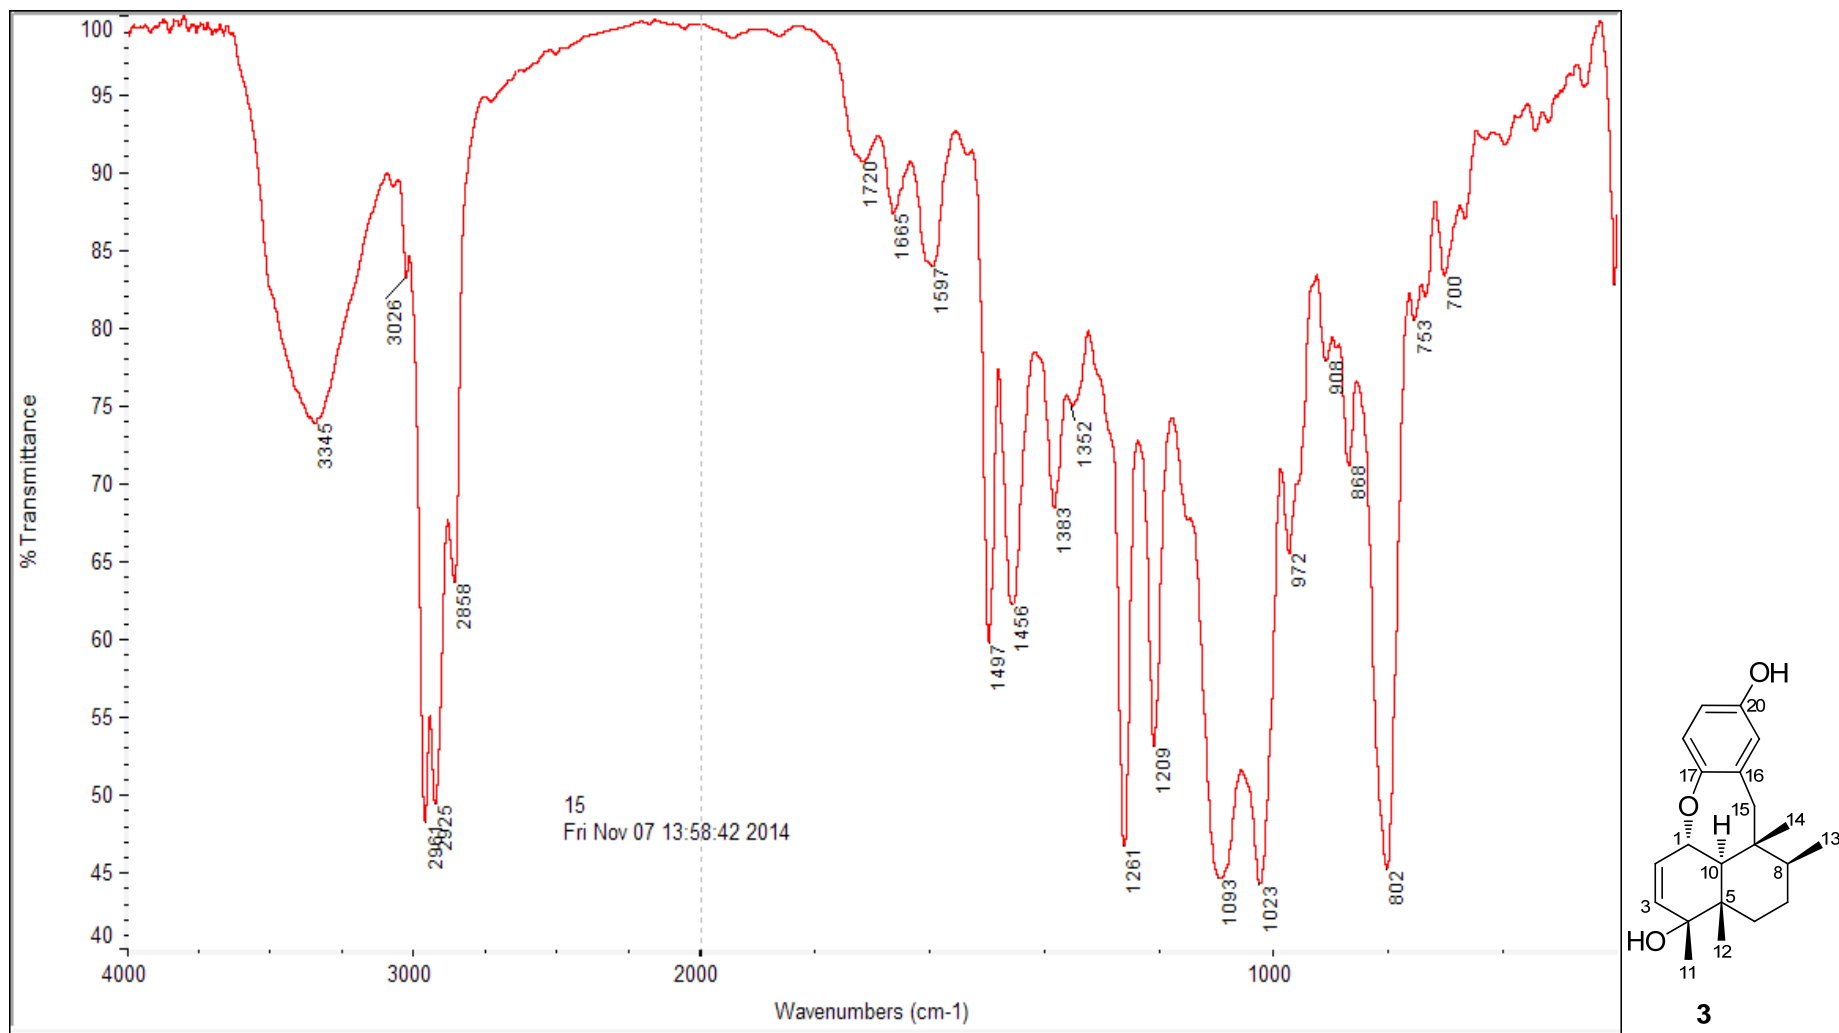

Figure S33. IR Spectrum of Dysiquinol C (3).

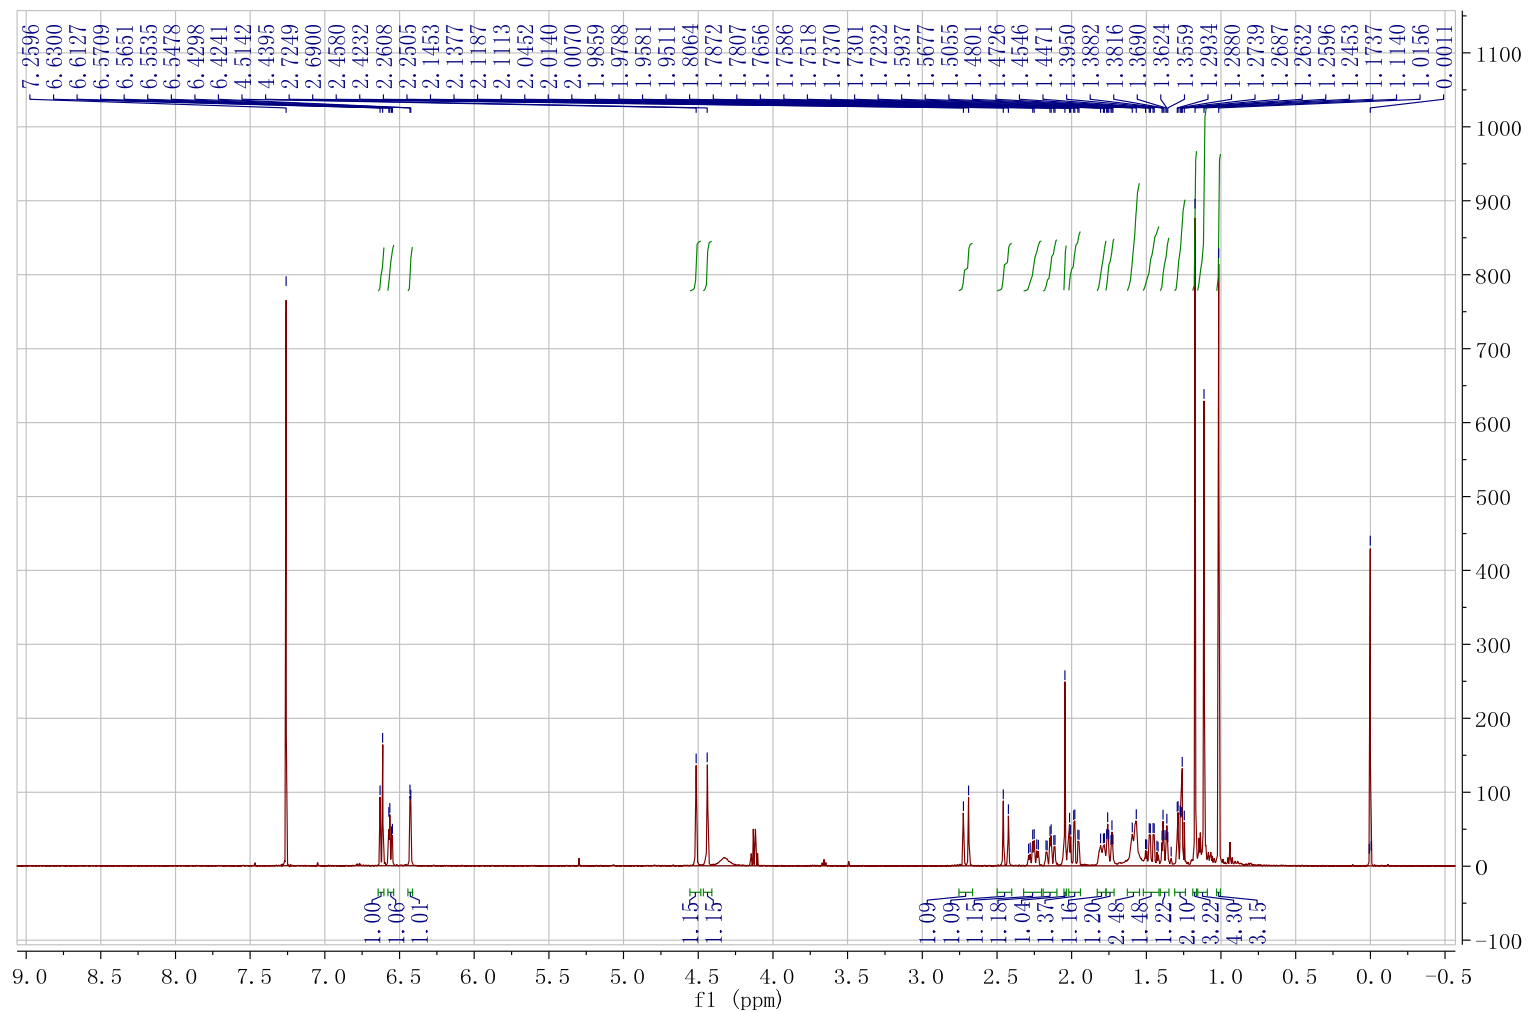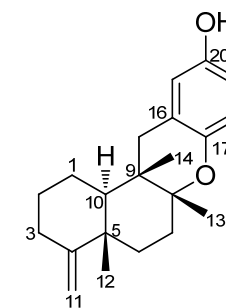

**4**

**Figure S34.**  $^1\text{H}$  NMR Spectrum of Dysiquinol D (**4**).



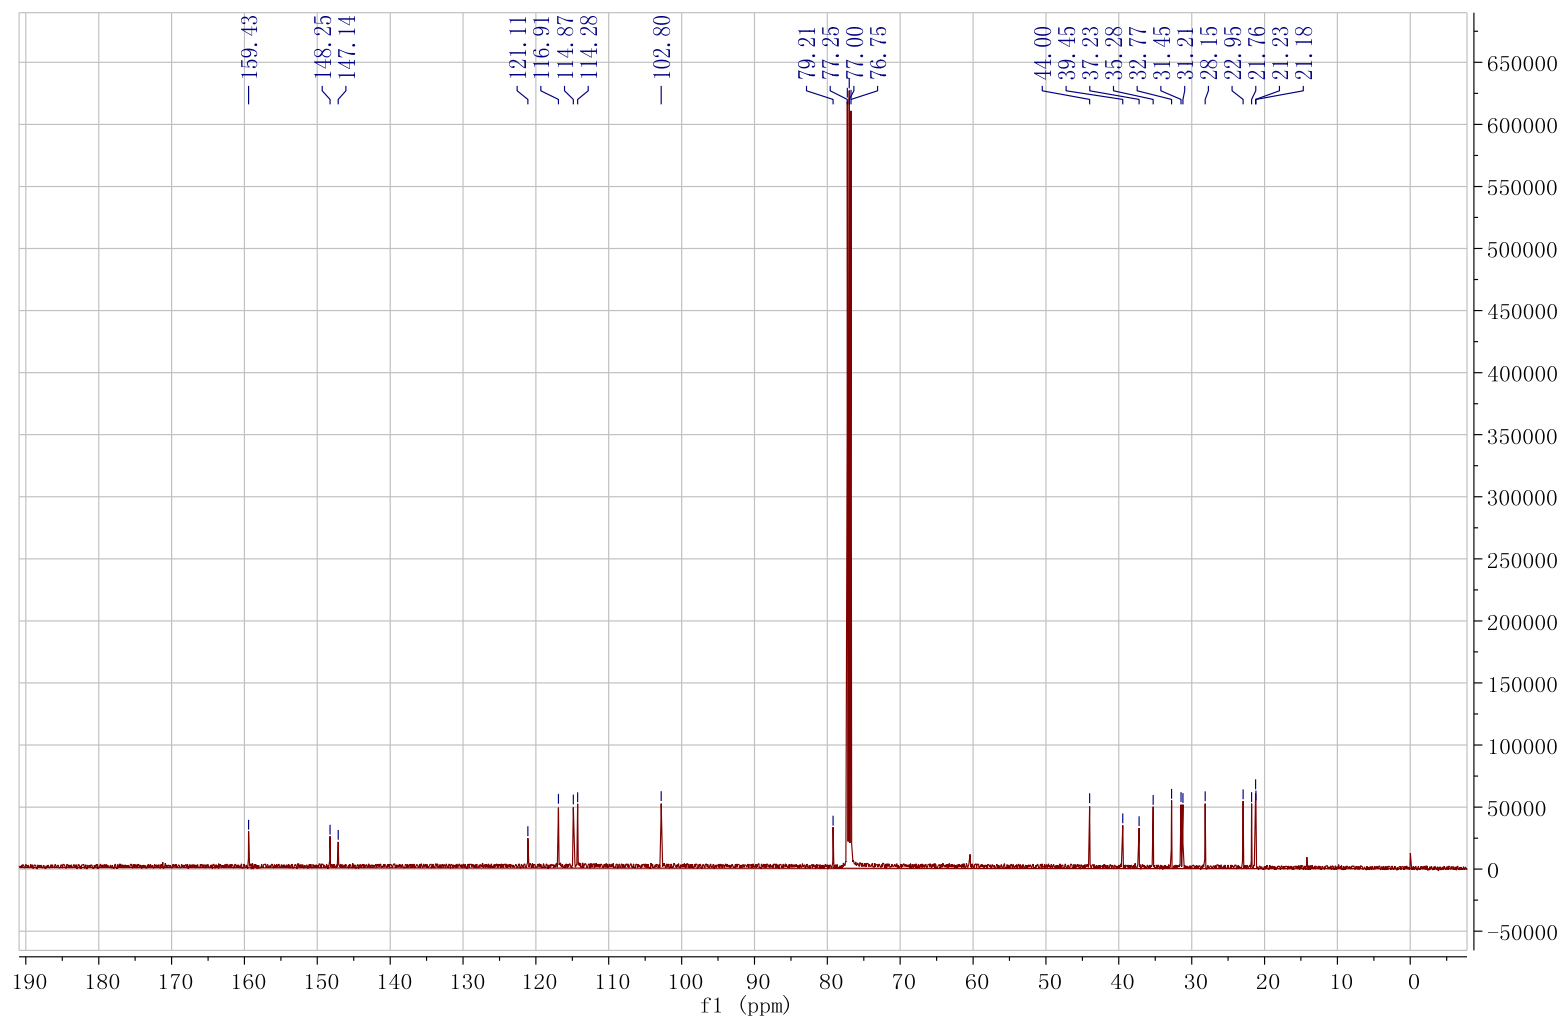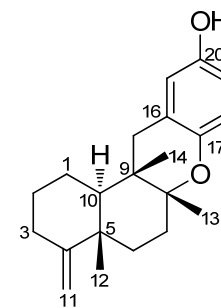

**4**

**Figure S35.** <sup>13</sup>C NMR Spectrum of Dysiquinol D (**4**).

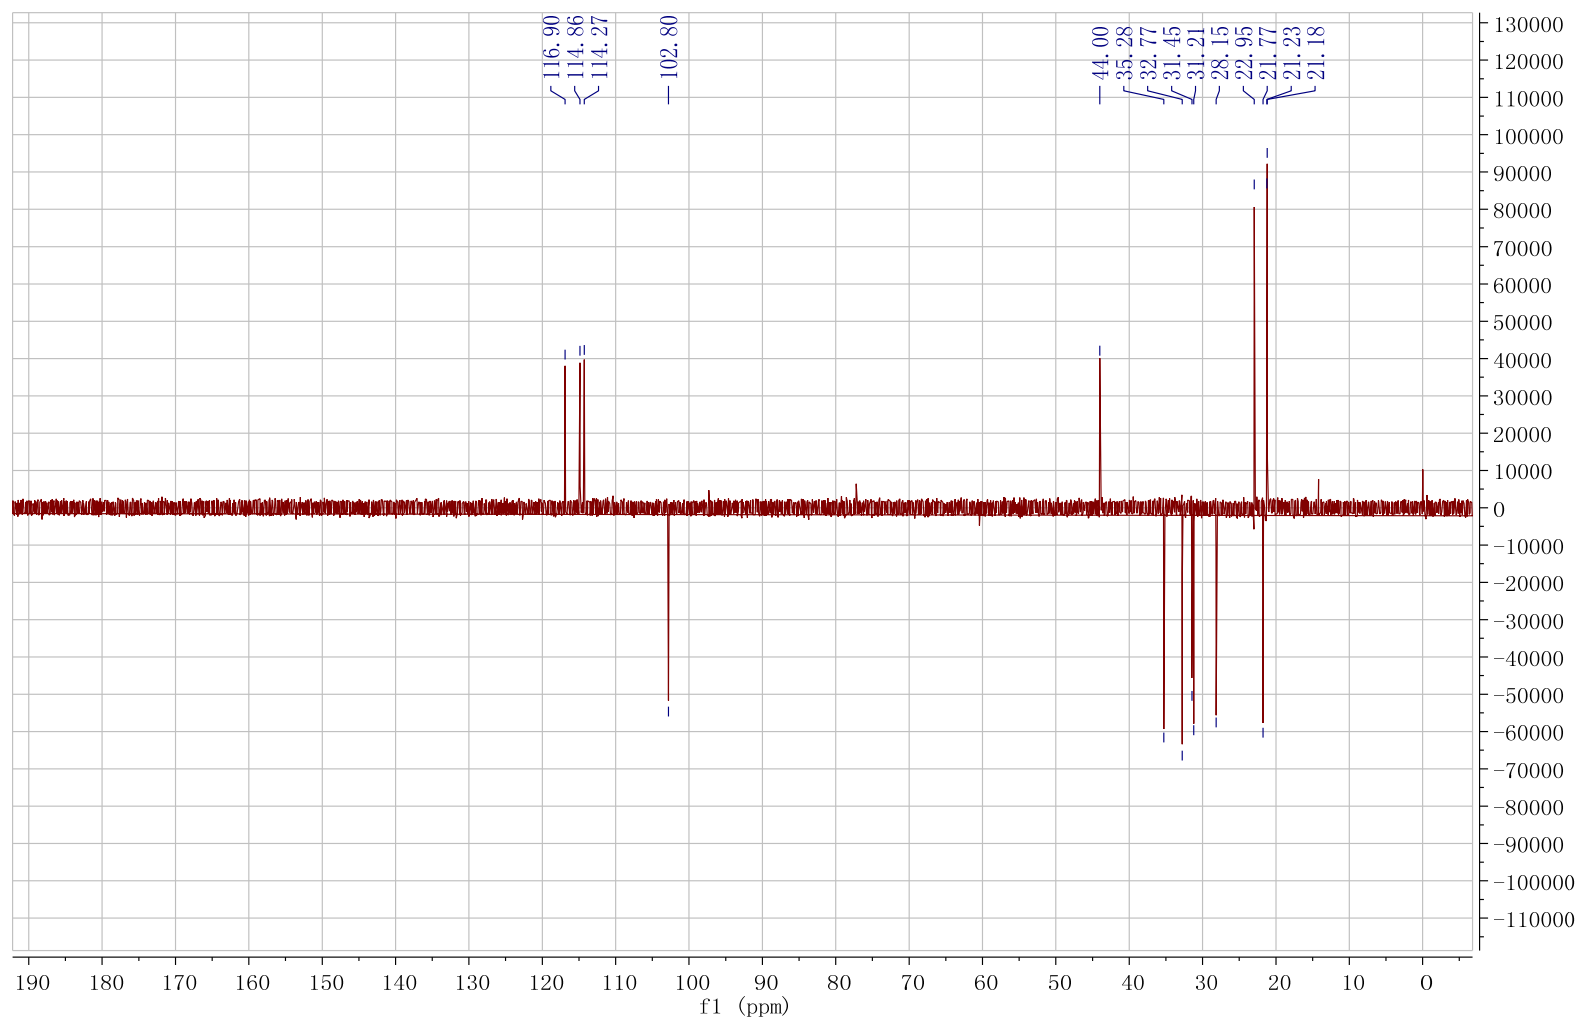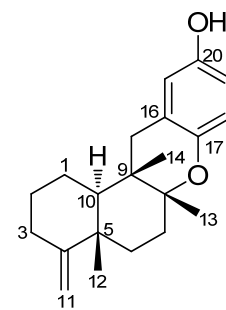

**4**

**Figure S36.** DEPT Spectrum of Dysiquinol D (**4**).

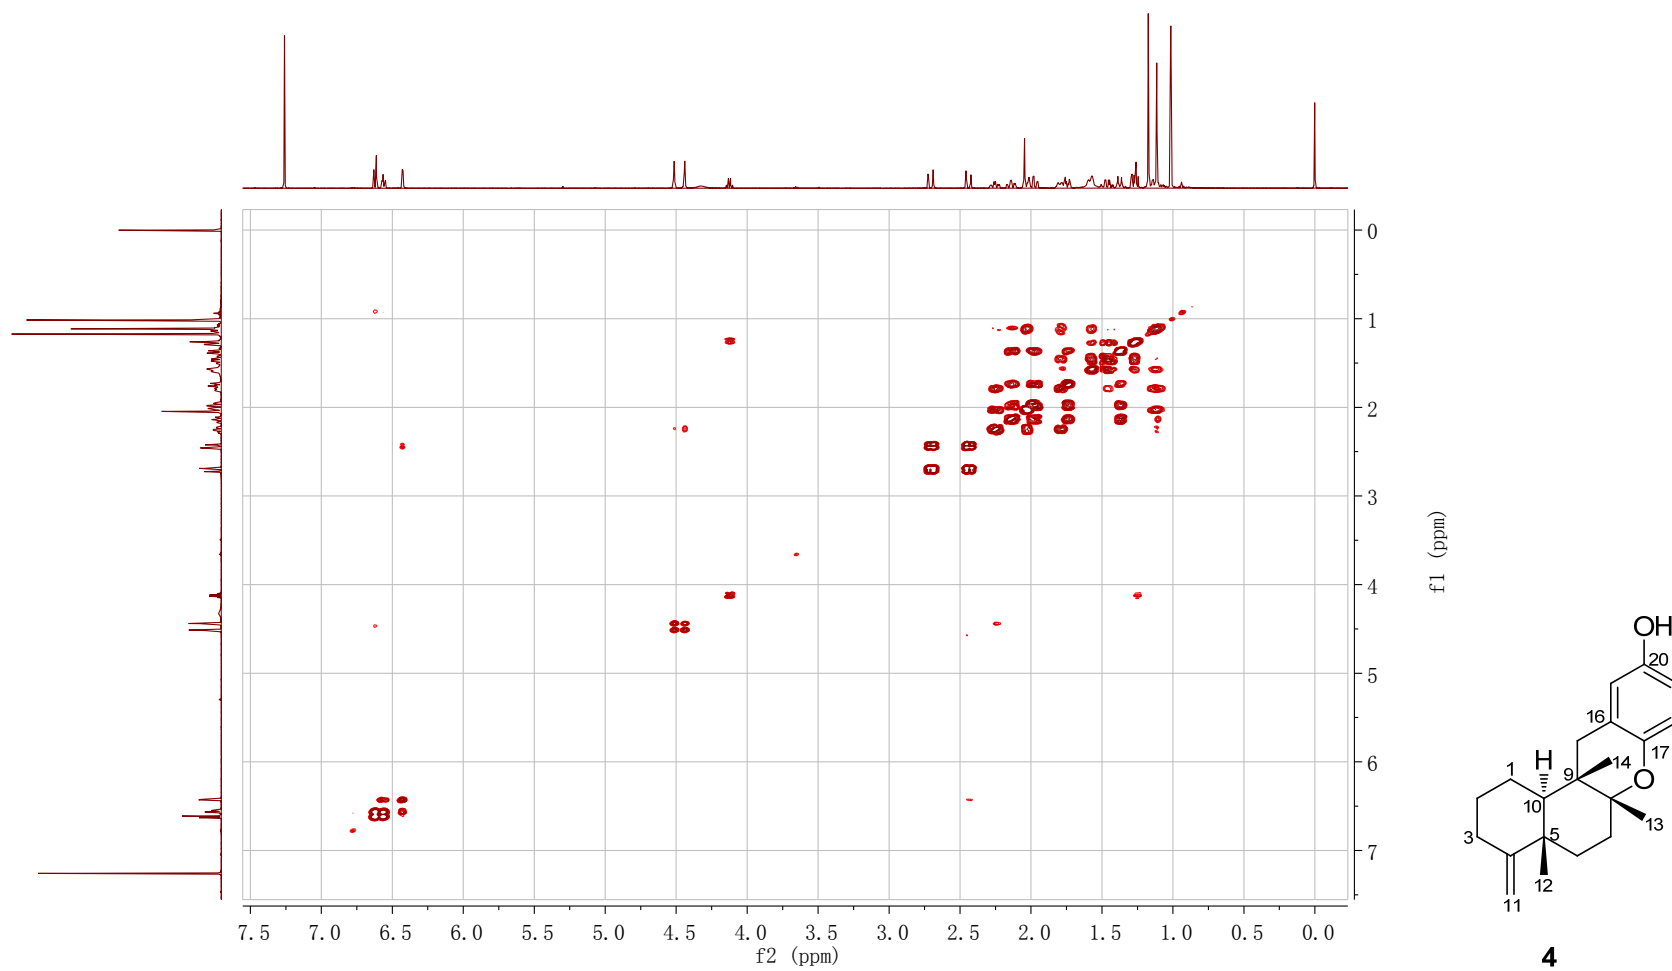

**Figure S37.**  $^1\text{H}$ - $^1\text{H}$  COSY Spectrum of Dysiquinol D (**4**).

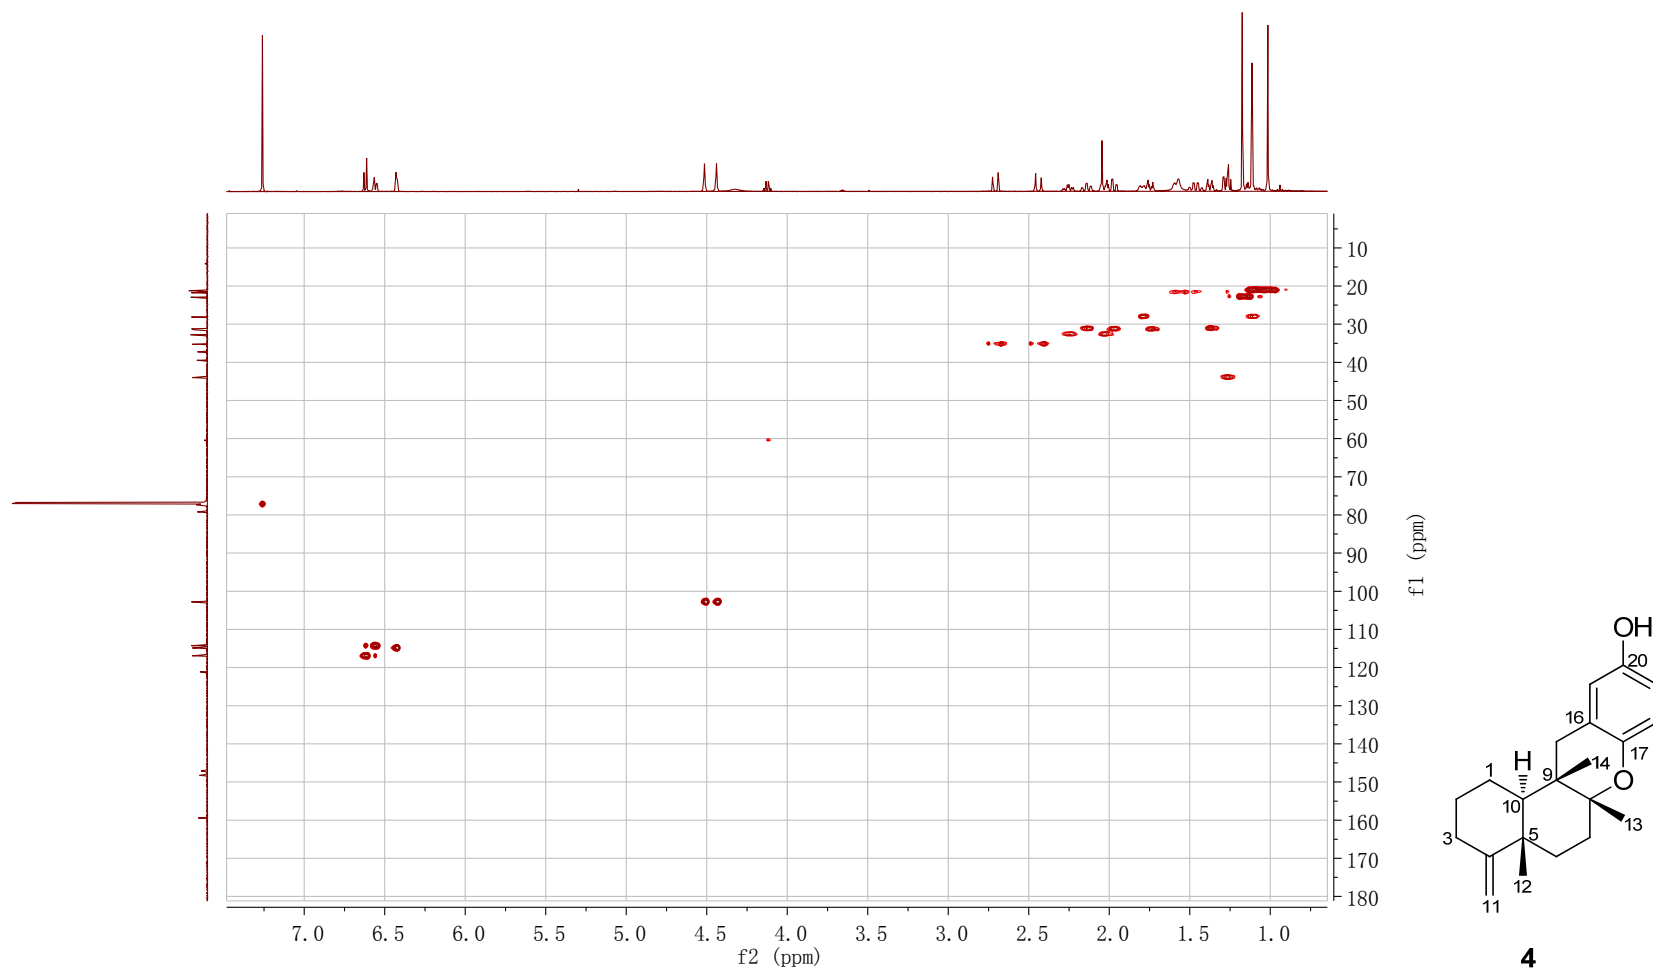

**Figure S38.** HSQC Spectrum of Dysiquinol D (**4**).

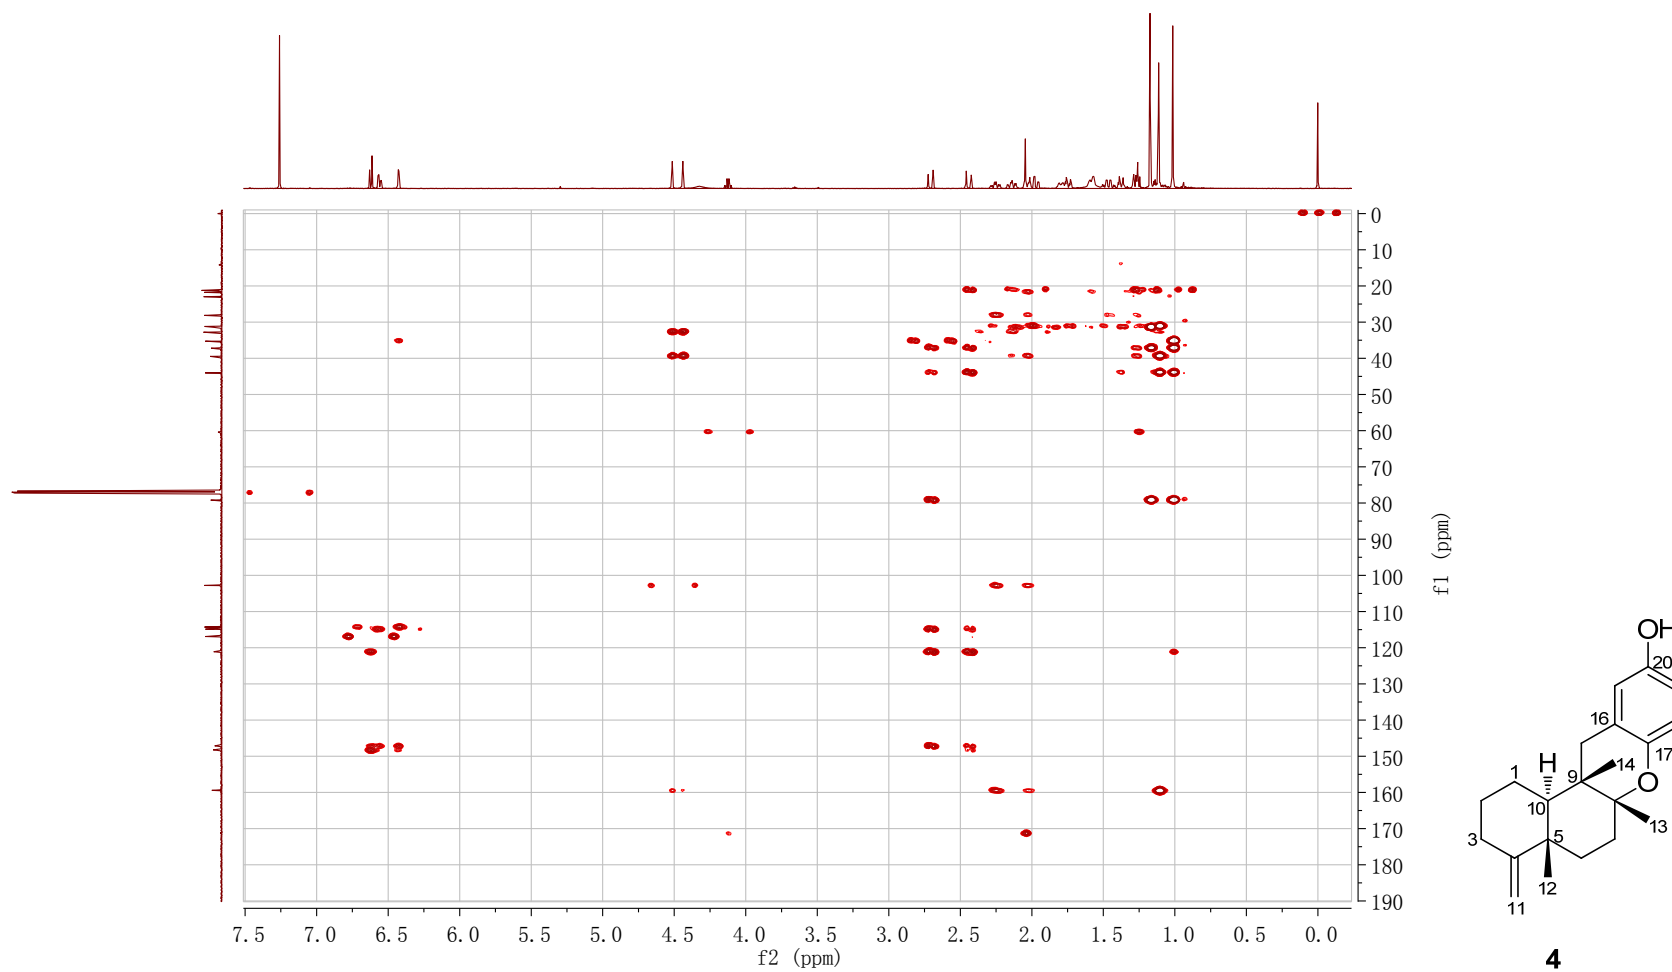

**Figure S39.** HMBC Spectrum of Dysiquinol D (**4**).

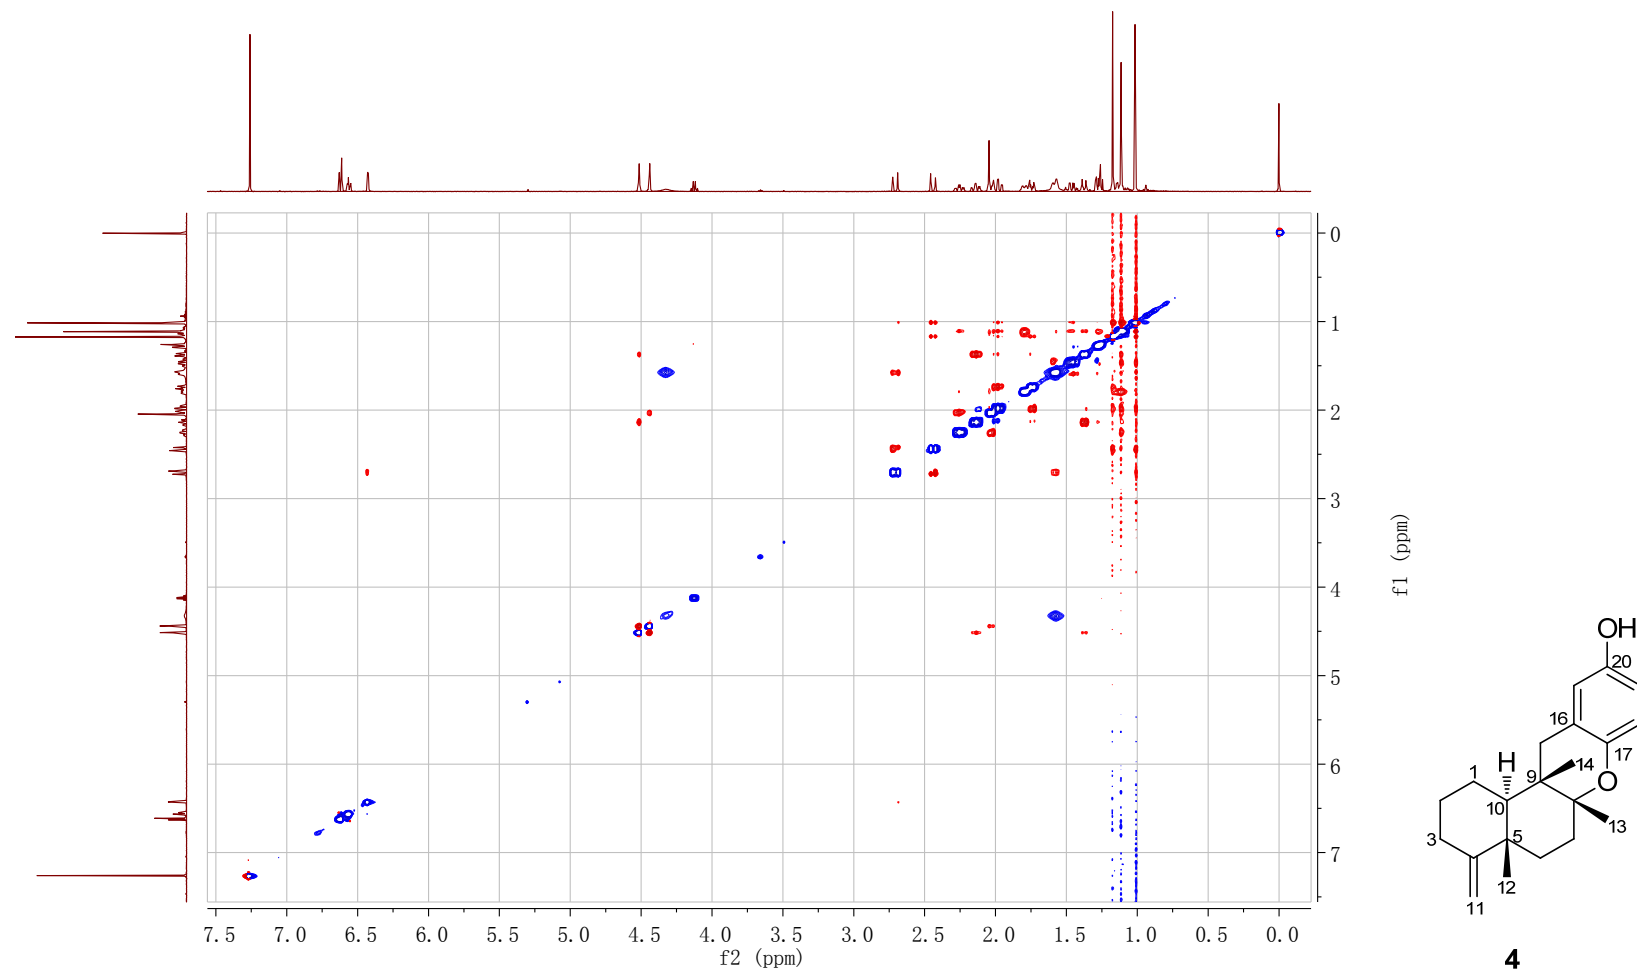

**Figure S40.** NOESY Spectrum of Dysiquinol D (**4**).

Elemental Composition Report *X7-15*

Tolerance = 20.0 PPM / DBE: min = -1.5, max = 50.0

Selected filters: None

Monoisotopic Mass, Even Electron Ions

14 formula(e) evaluated with 1 results within limits (up to 50 closest results for each mass)

Elements Used:

C: 10-25 H: 10-40 O: 1-6

SIPI

XT-15 M.W=312

WQ12-324H 10 (0.352) AM (Cen,4, 80.00, Ar,5000.0,308.05,0.70); Sm (SG, 2x1.00); Cm (2:11)

Q-ToF micro

YA019

313.2169

16-Jul-2012,15:28:35

TOF MS ES+  
1.93e4

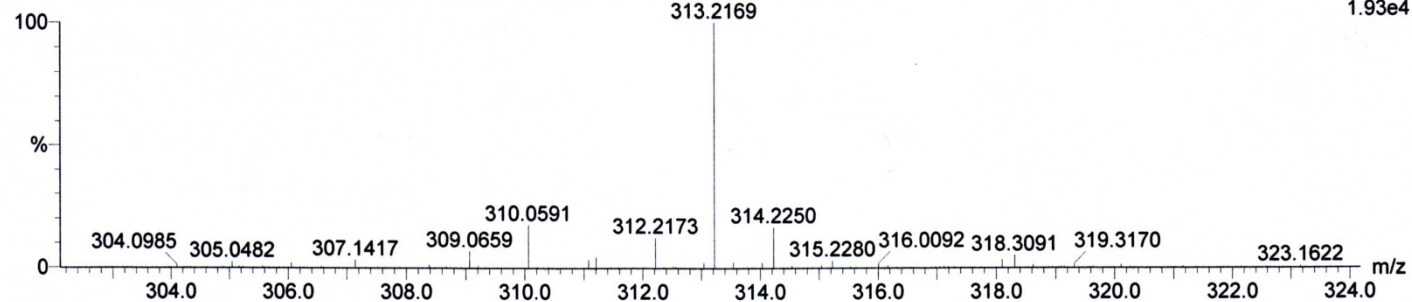

Minimum: 70.00  
Maximum: 100.00

| Mass     | RA     | Calc. Mass | mDa | PPM | DBE | i-FIT | Formula    |
|----------|--------|------------|-----|-----|-----|-------|------------|
| 313.2169 | 100.00 | 313.2168   | 0.1 | 0.3 | 7.5 | 249.0 | C21 H29 O2 |

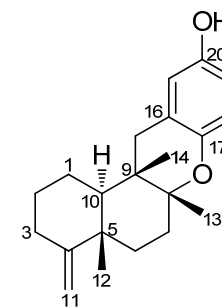

4

Figure S41. HRESIMS of Dysiquinol D (4).

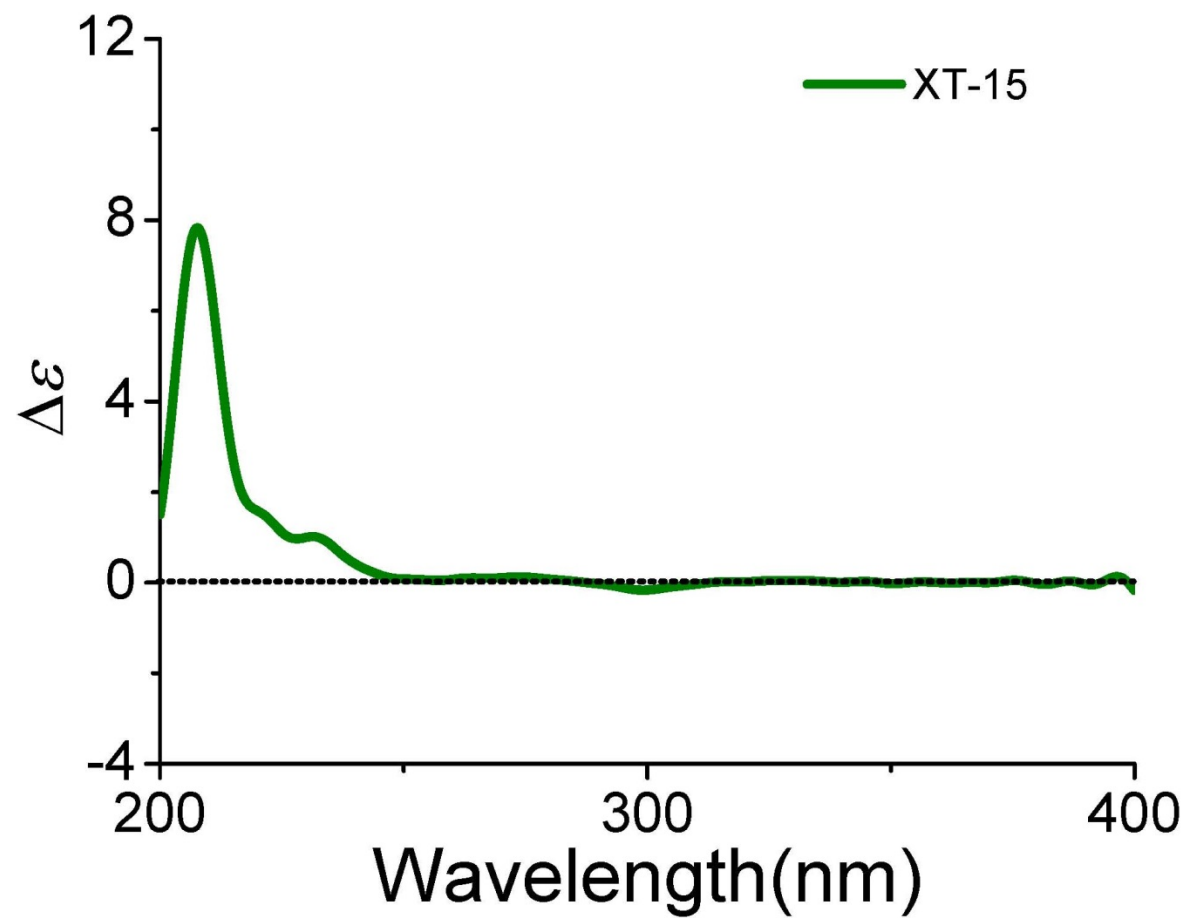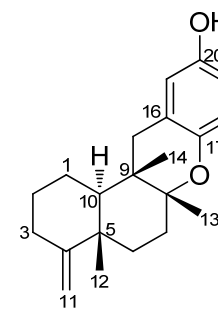

4

Figure S42. CD Spectrum of Dysiquinol D (4) in MeOH.



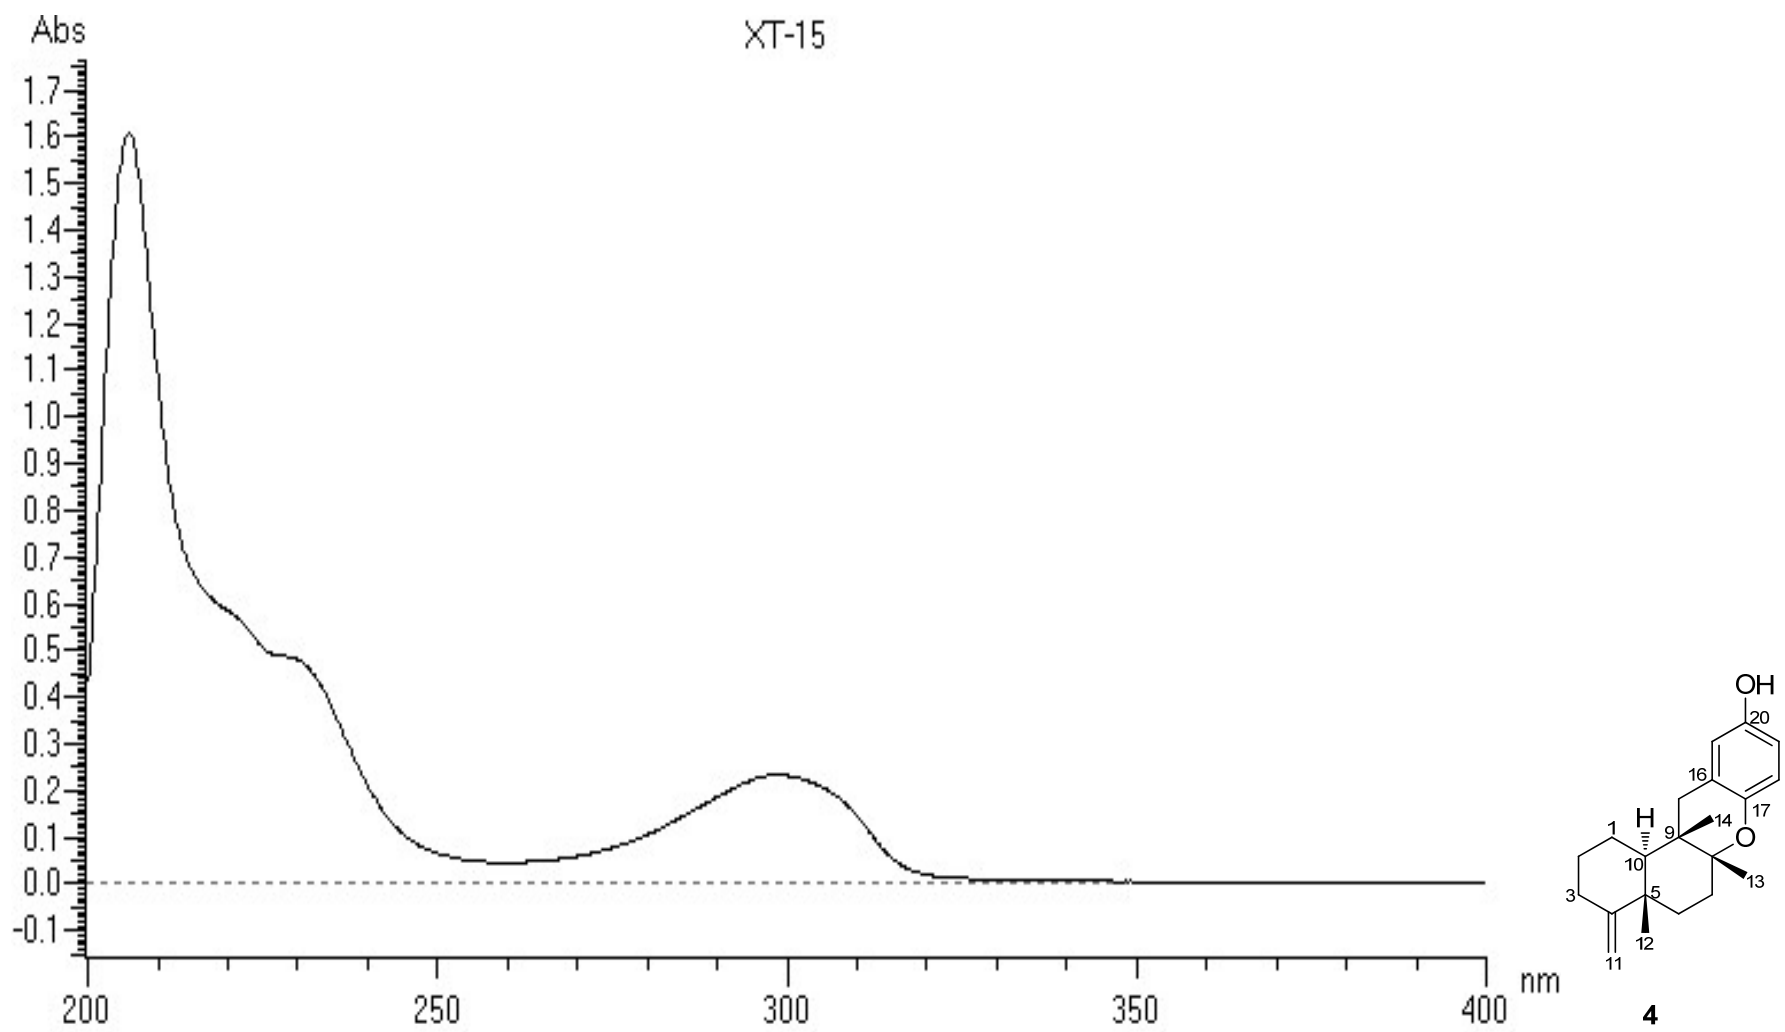

**Figure S43.** UV Spectrum of Dysiquinol D (**4**).

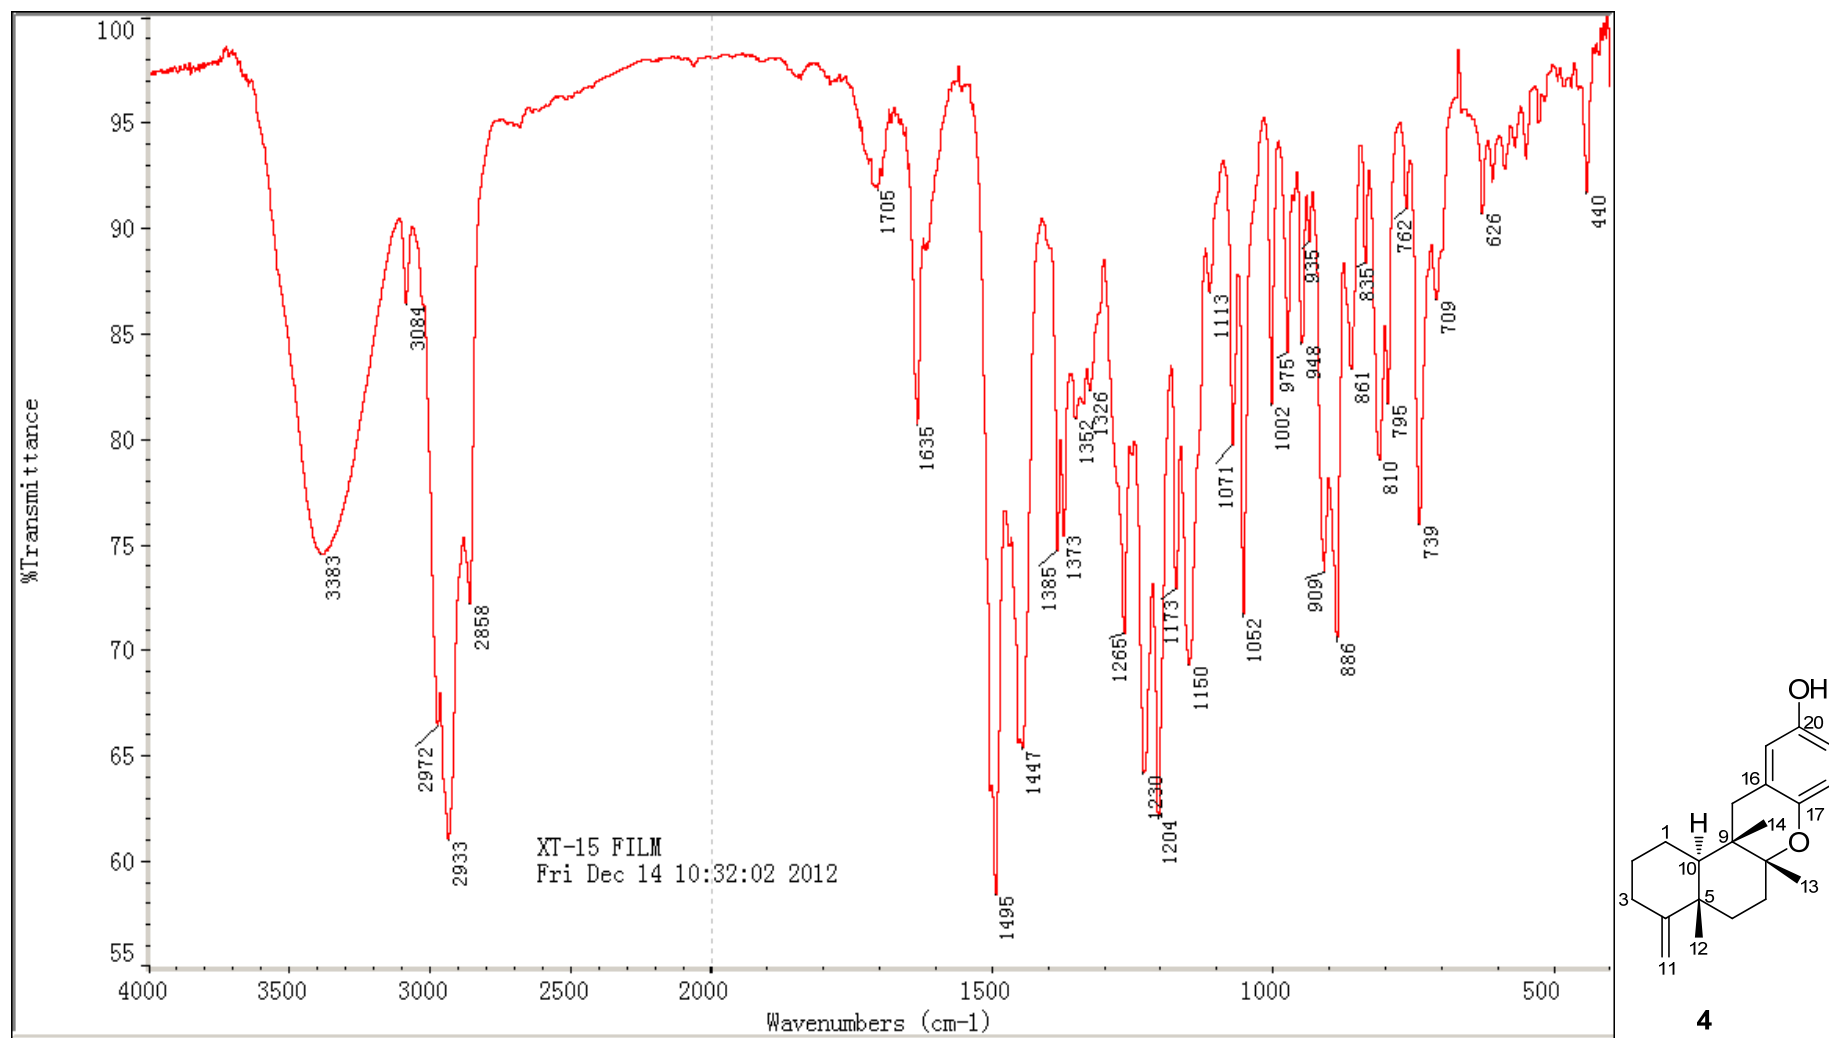

Figure S44. IR Spectrum of Dysiquinol D (**4**).

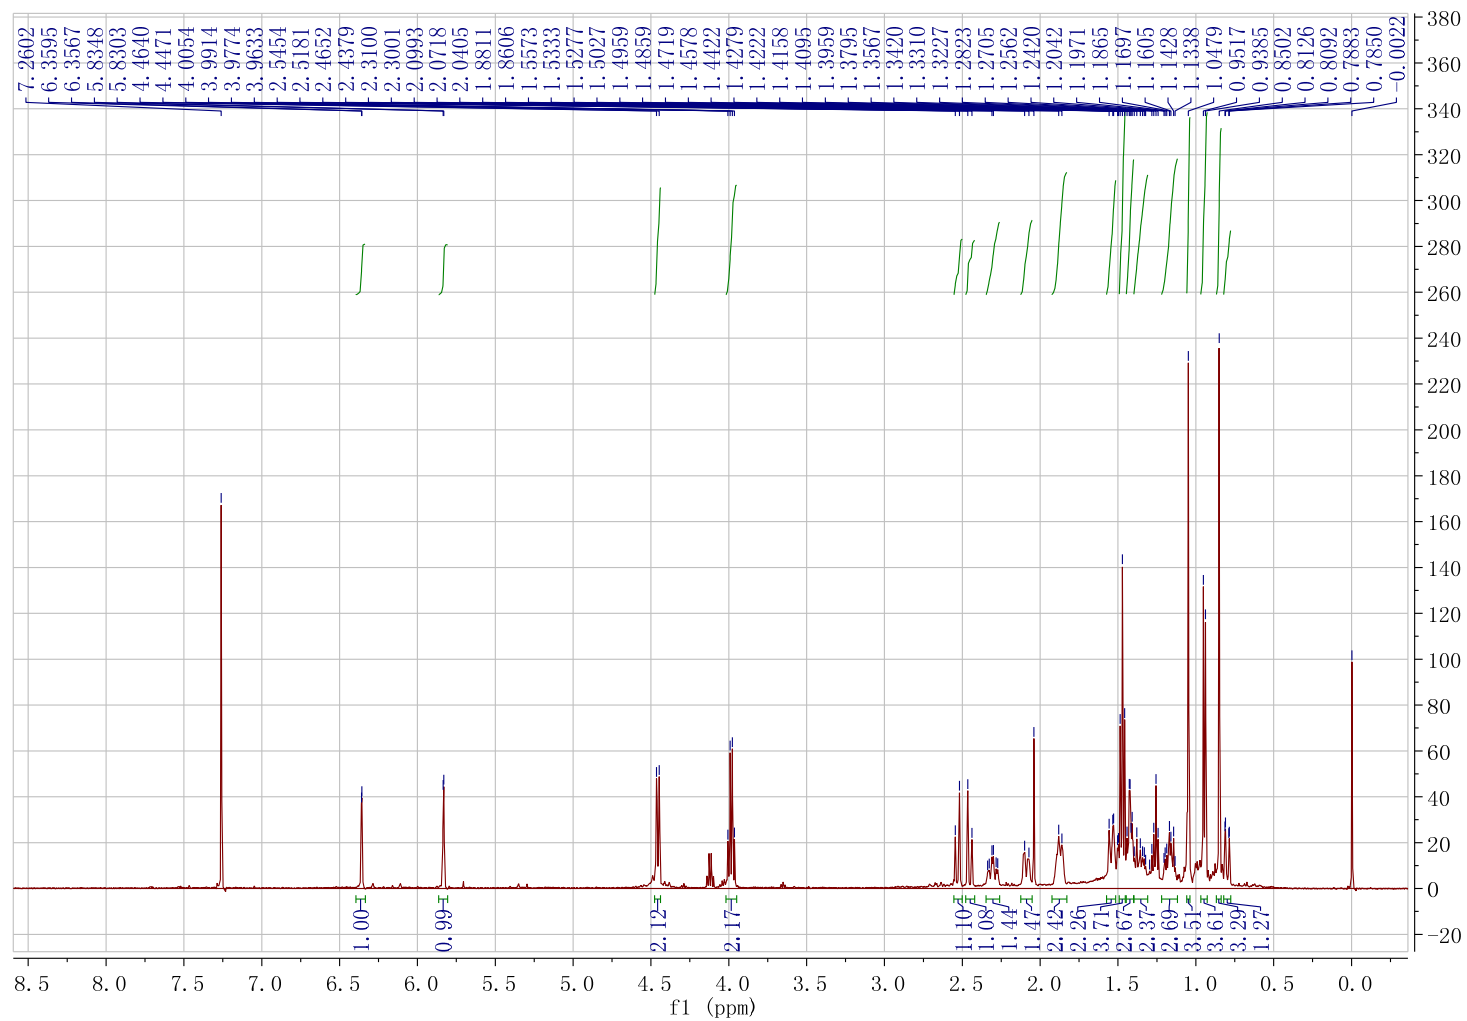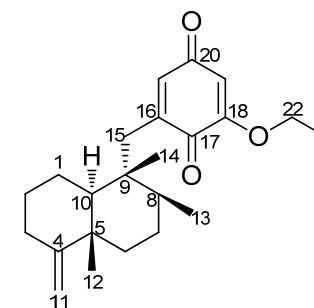

**5**

**Figure S45.**  $^1\text{H}$  NMR Spectrum of (5*S*,8*S*,9*R*,10*S*)-18-ethoxylneoavarone (**5**).

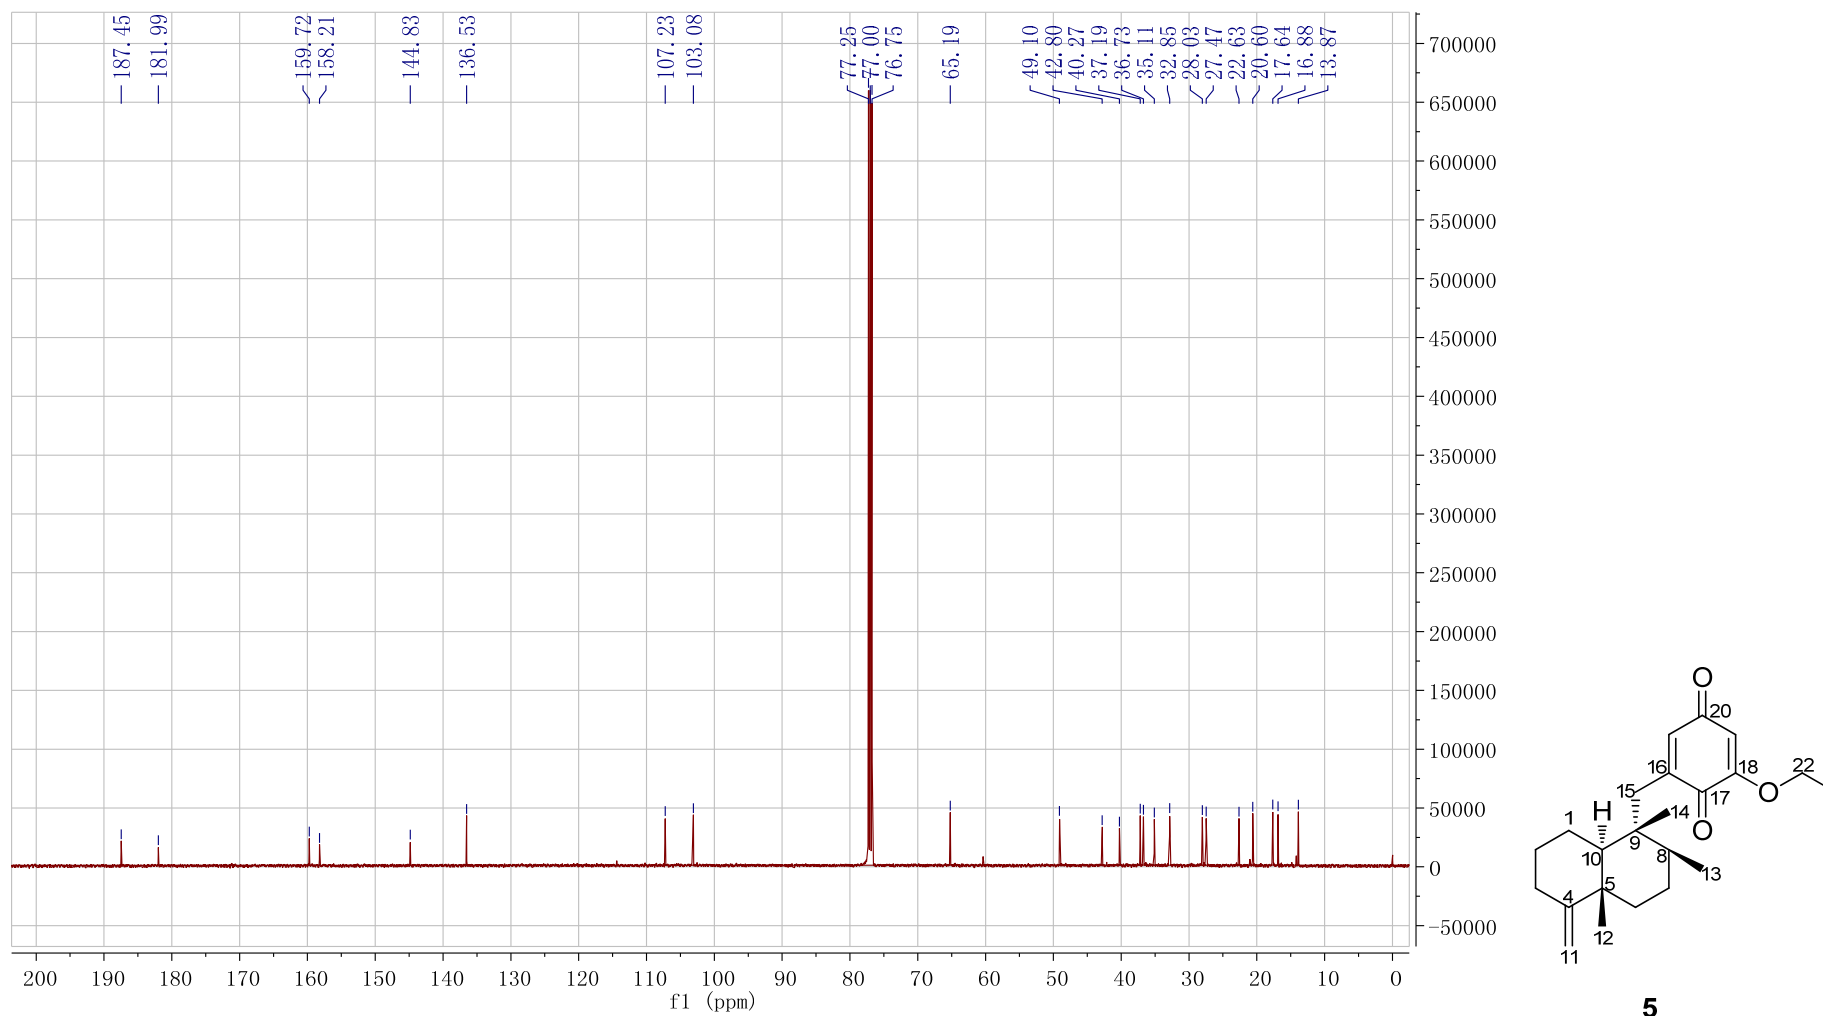

**Figure S46.** <sup>13</sup>C NMR Spectrum of (5*S*,8*S*,9*R*,10*S*)-18-ethoxyneovarone (**5**).

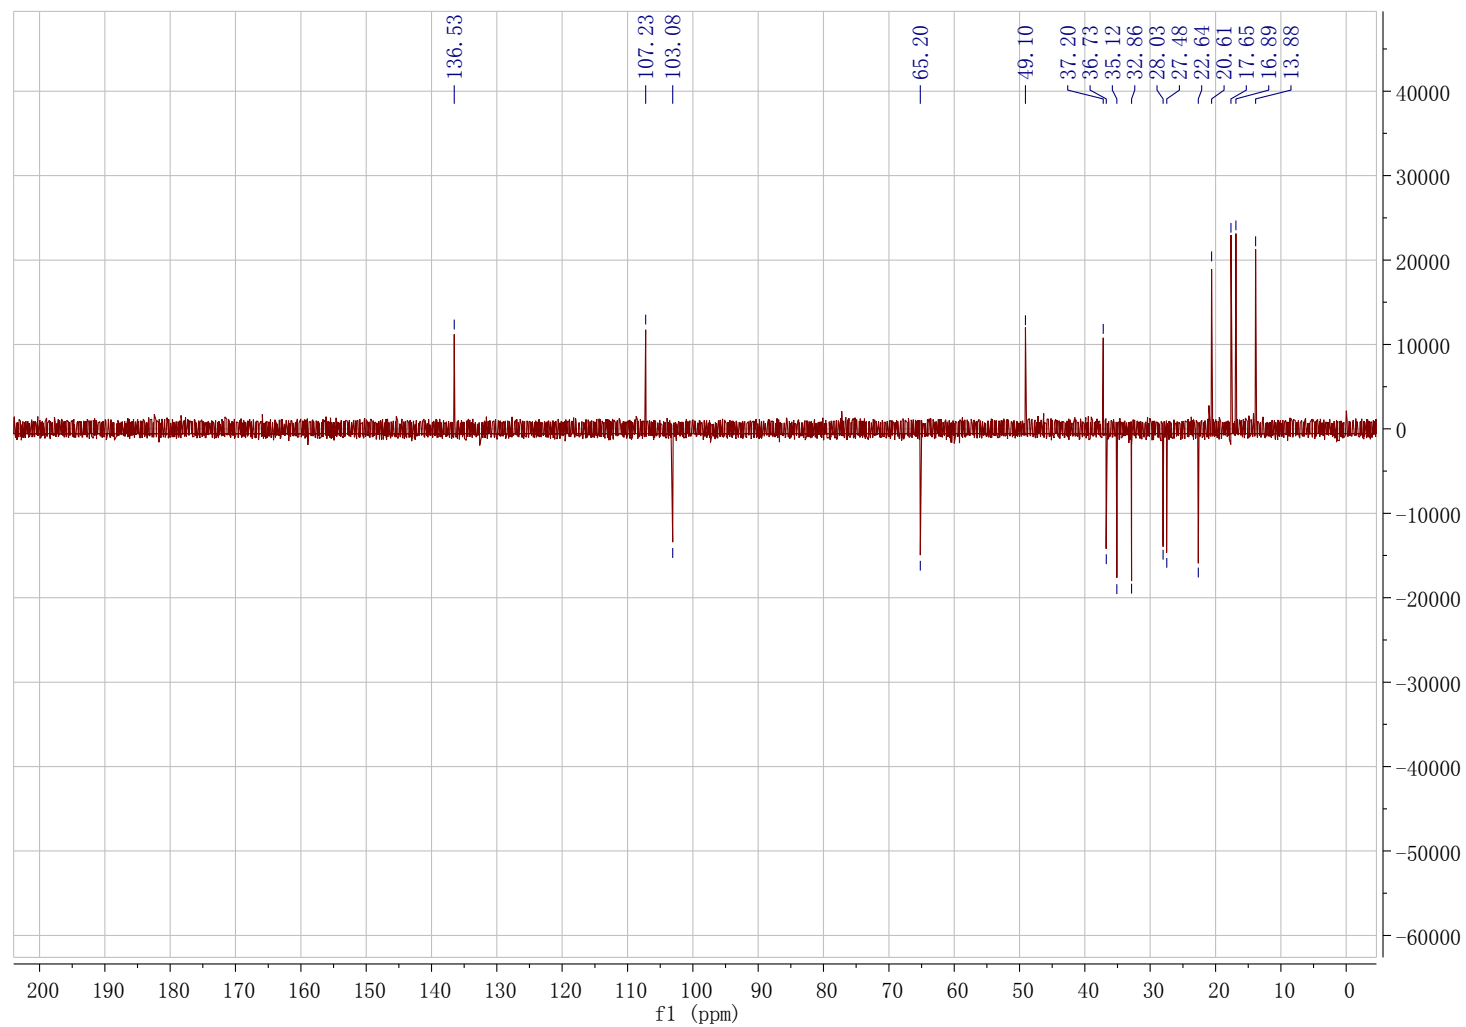

**Figure S47.** DEPT135 Spectrum of (5*S*,8*S*,9*R*,10*S*)-18-ethoxyneoavarone (**5**).

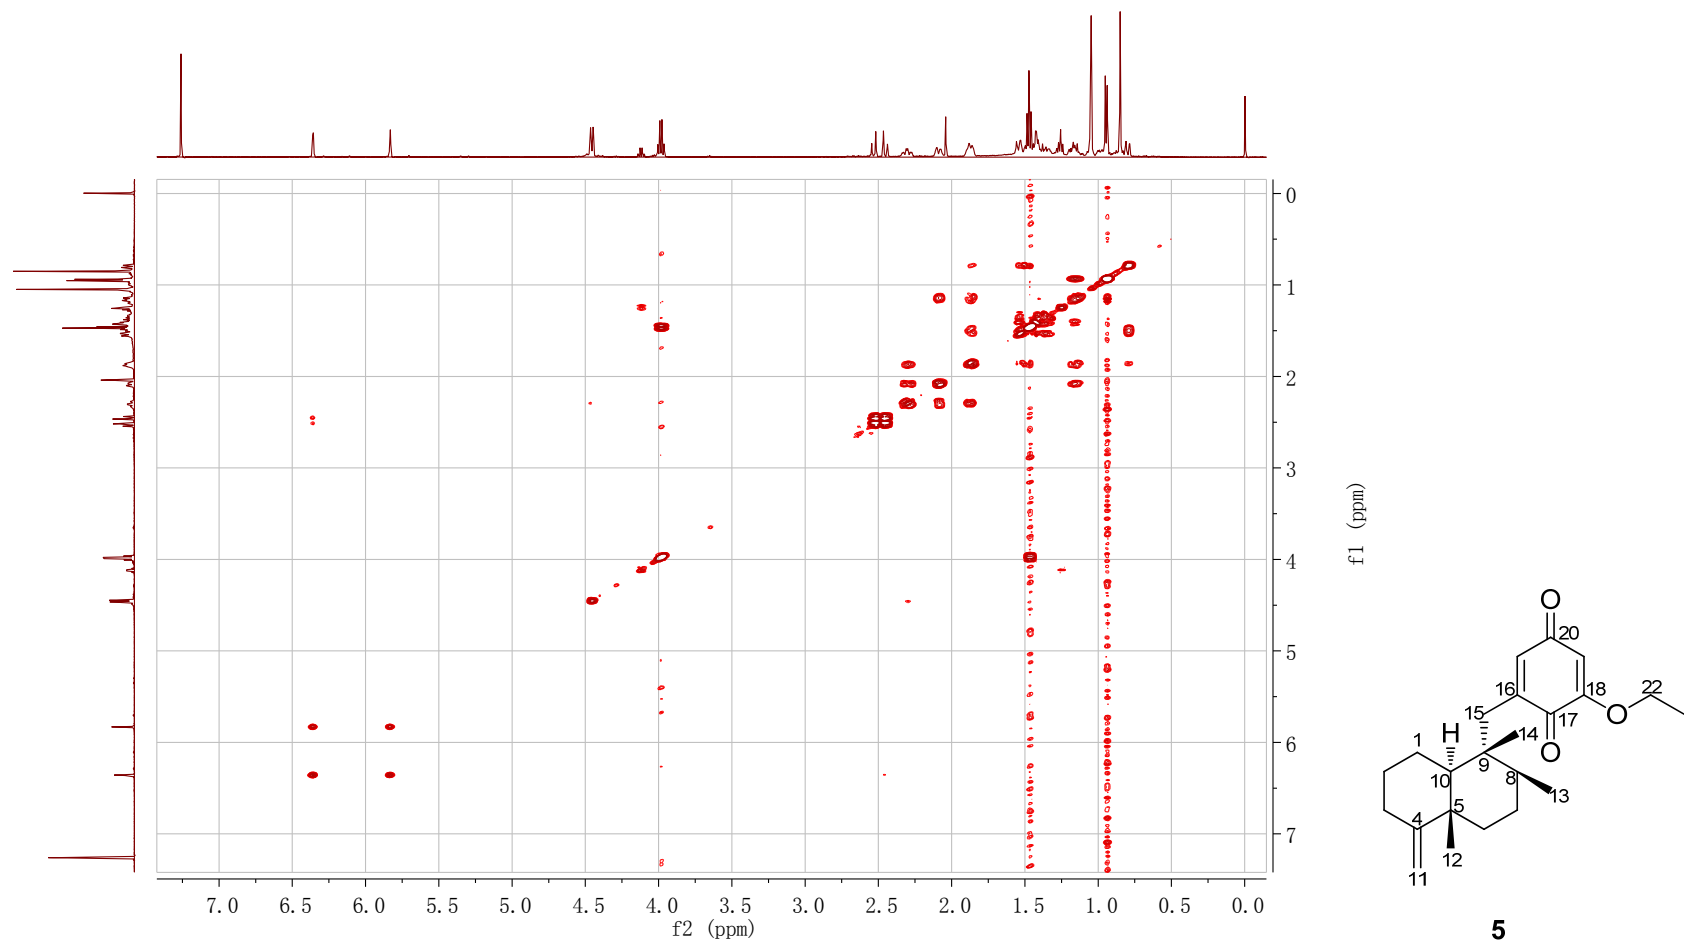

**Figure S48.**  $^1\text{H}$ - $^1\text{H}$  COSY Spectrum of (5*S*,8*S*,9*R*,10*S*)-18-ethoxyneoavarone (**5**).

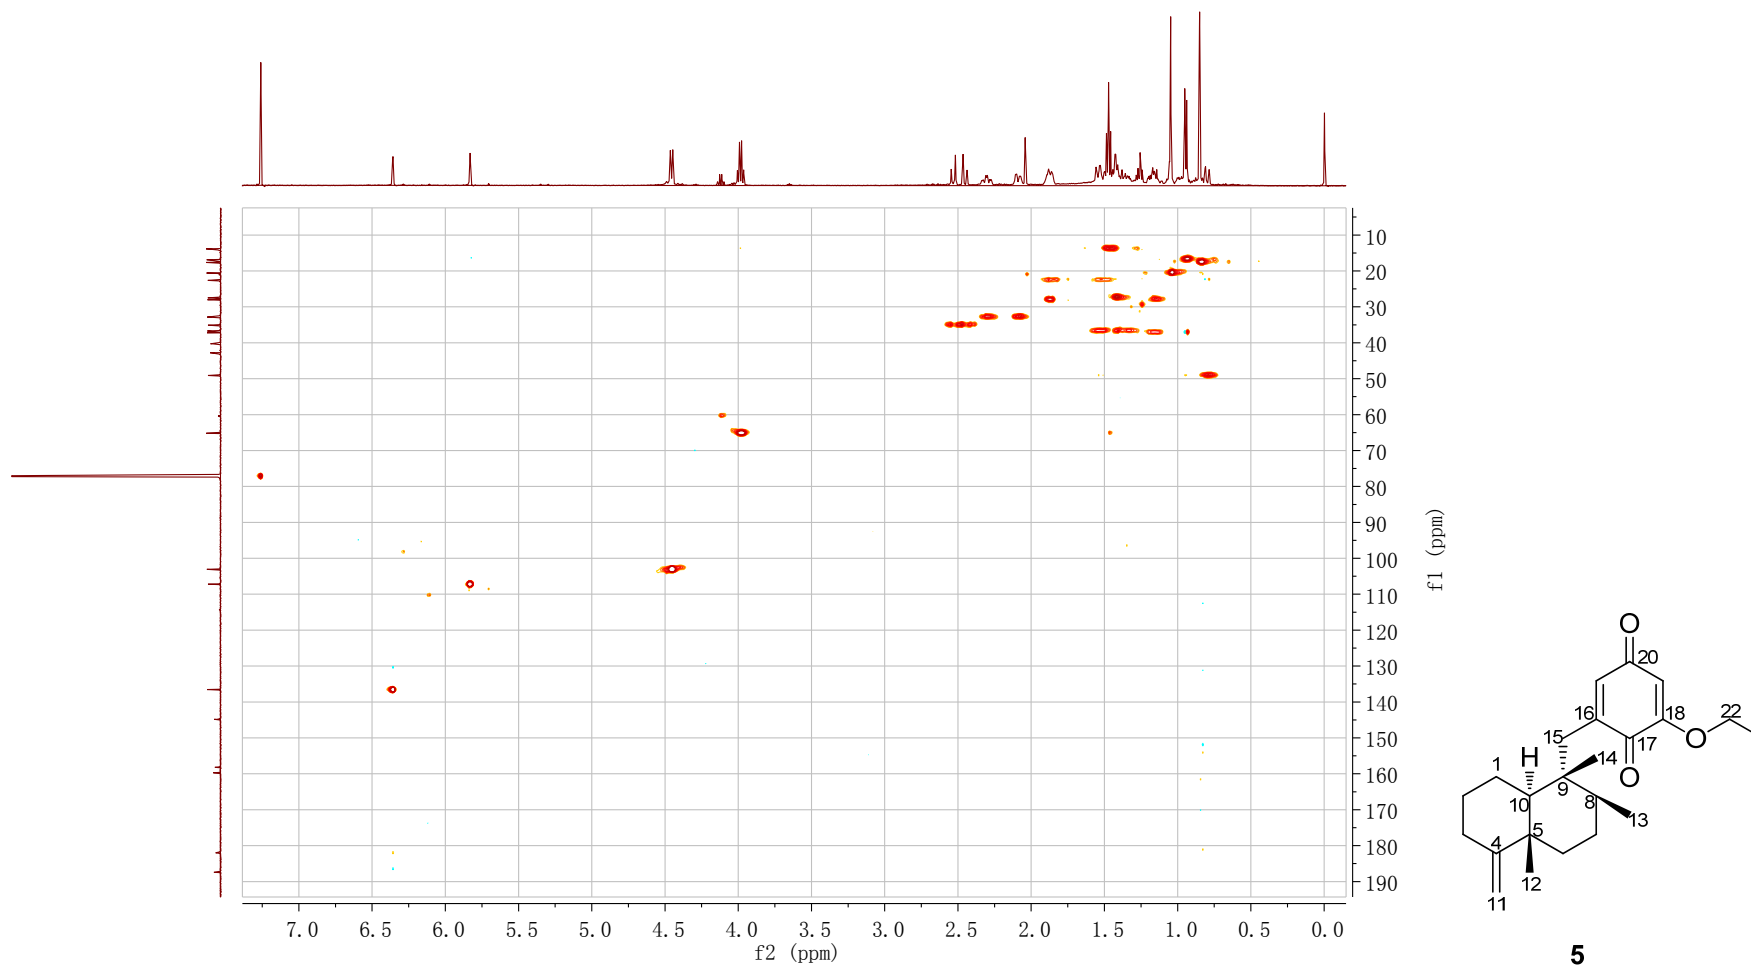

**Figure S49.** HSQC Spectrum of (5*S*,8*S*,9*R*,10*S*)-18-ethoxyneovarone (**5**).

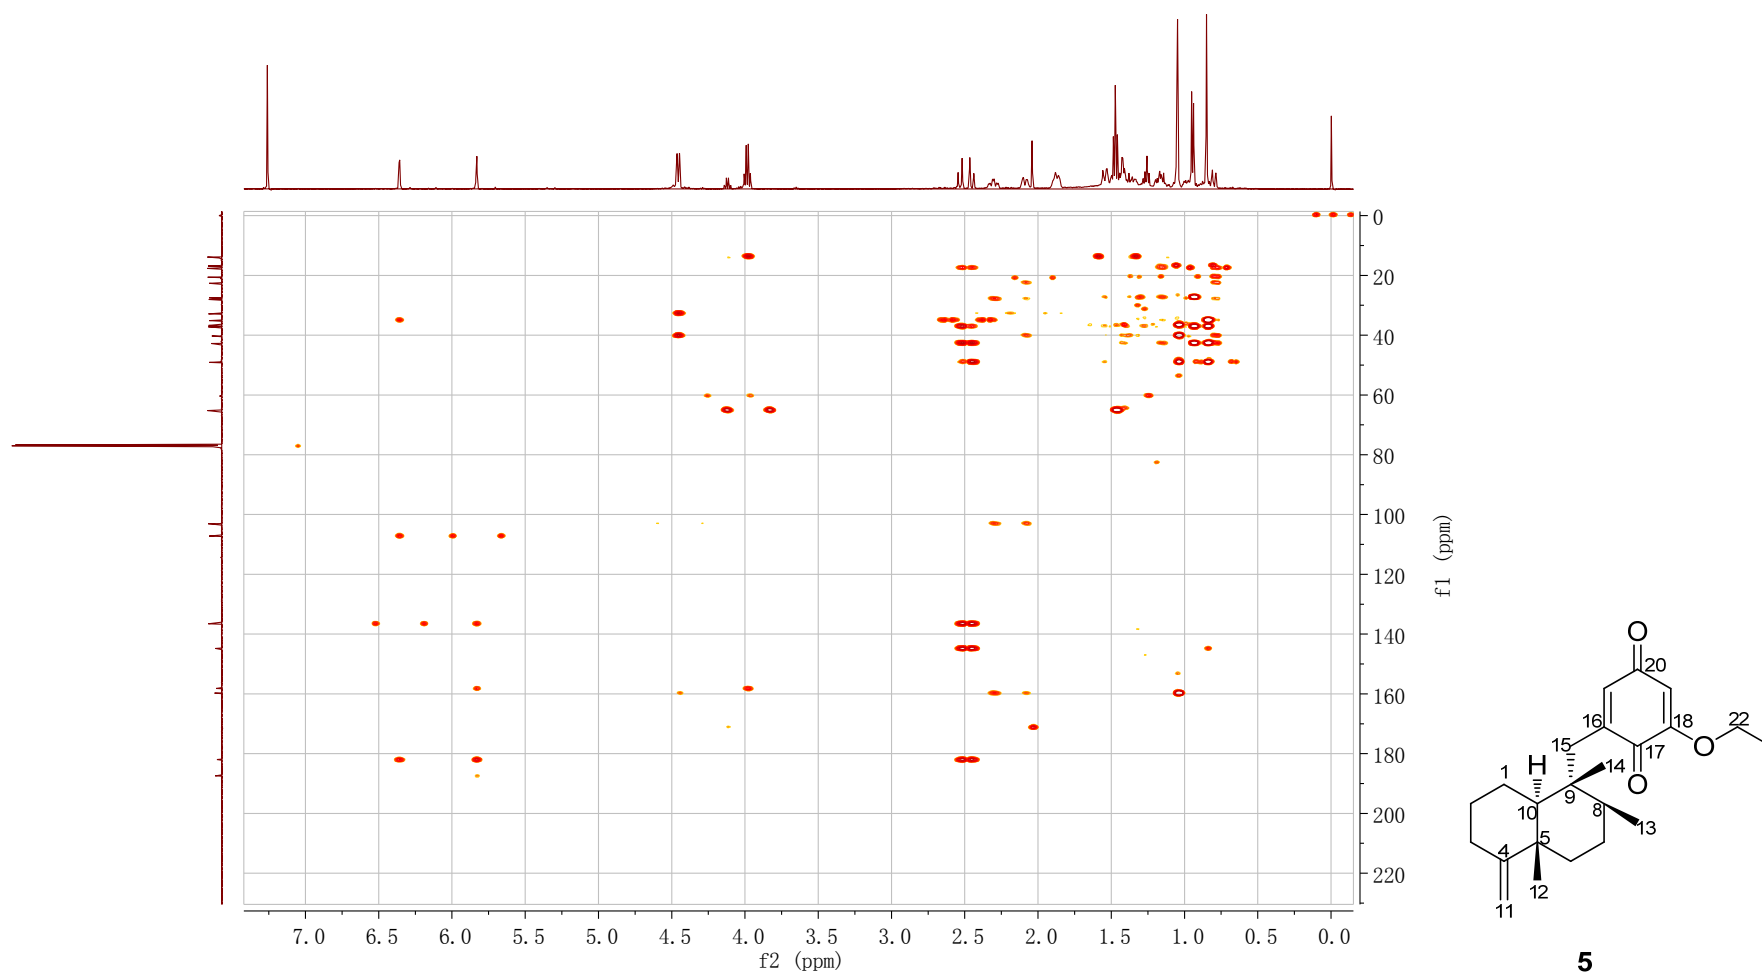

**Figure S50.** HMBC Spectrum of (5*S*,8*S*,9*R*,10*S*)-18-ethoxyneovarone (**5**).



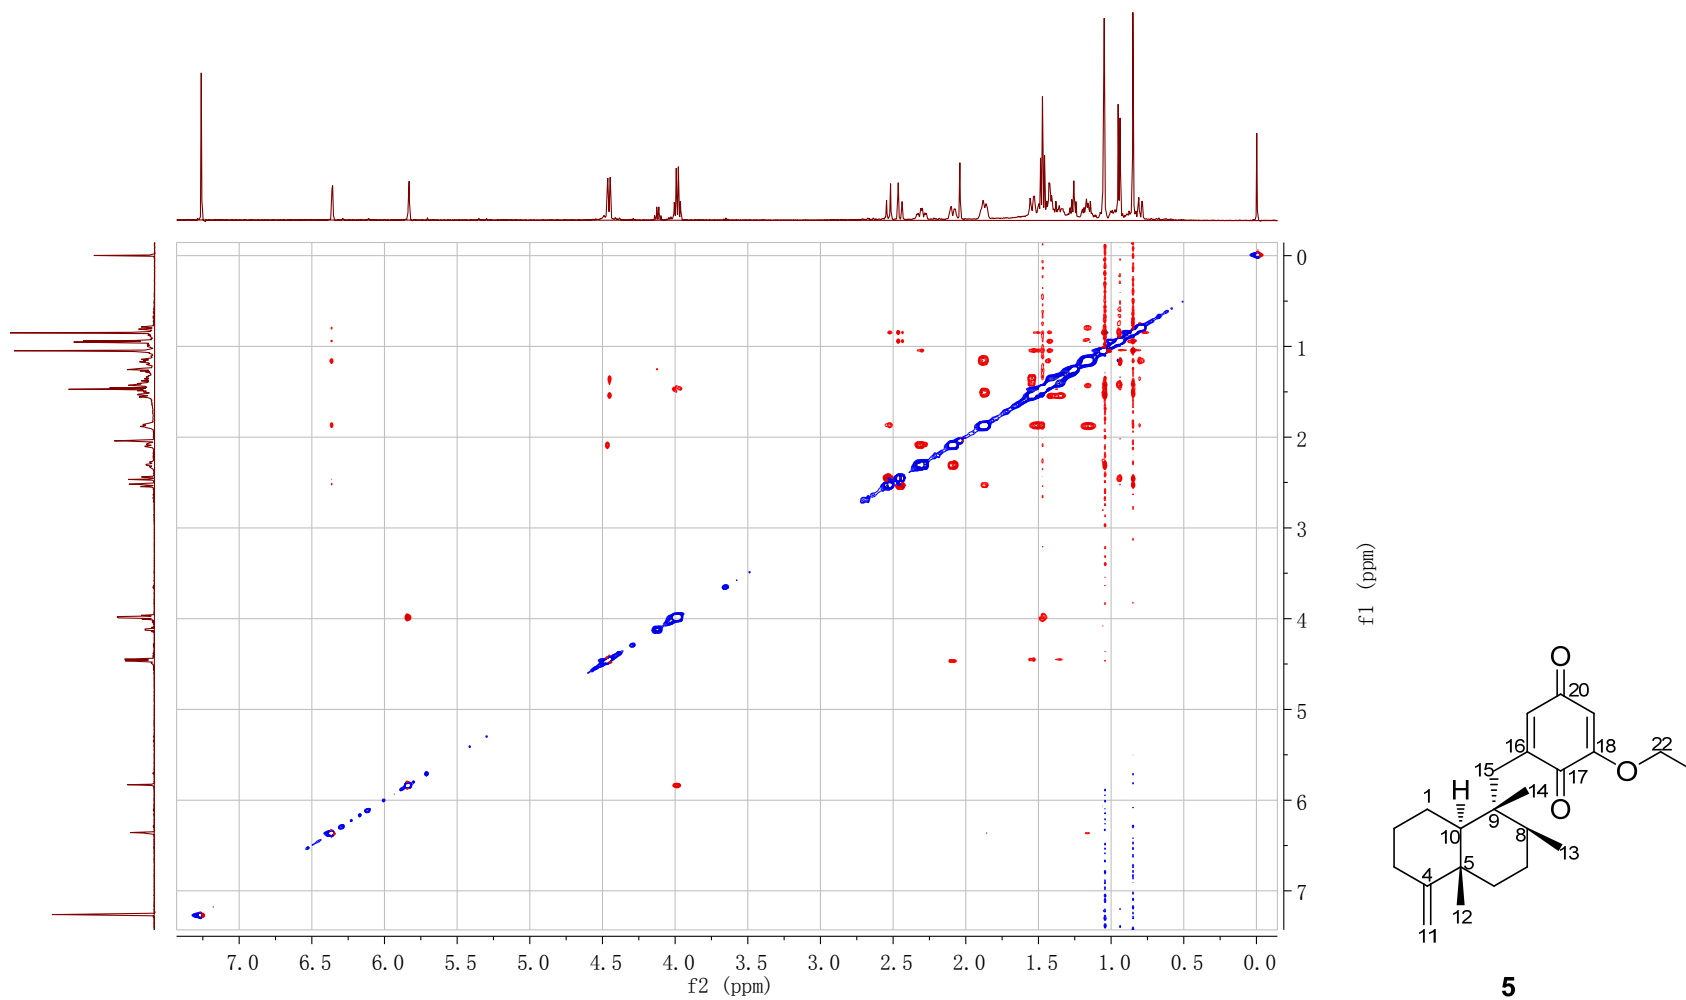

**Figure S51.** NOESY Spectrum of (5*S*,8*S*,9*R*,10*S*)-18-ethoxyneovarone (**5**).

Elemental Composition Report *X7-7*

Tolerance = 20.0 PPM / DBE: min = -1.5, max = 50.0  
 Selected filters: None

Monoisotopic Mass, Even Electron Ions  
 13 formula(e) evaluated with 1 results within limits (up to 50 closest results for each mass)  
 Elements Used:

C: 10-25 H: 10-40 O: 1-6 Na: 1-1

SIPI  
 XT-7 M.W=356  
 WQ12-323H 51 (1.797) AM (Cen,4, 80.00, Ar,5000.0,376.07,0.70); Sm (SG, 2x1.00); Cm (38:56)  
 Q-ToF micro YA019  
 379.2247

16-Jul-2012,15:05:05

TOF MS ES+  
 4.68e4

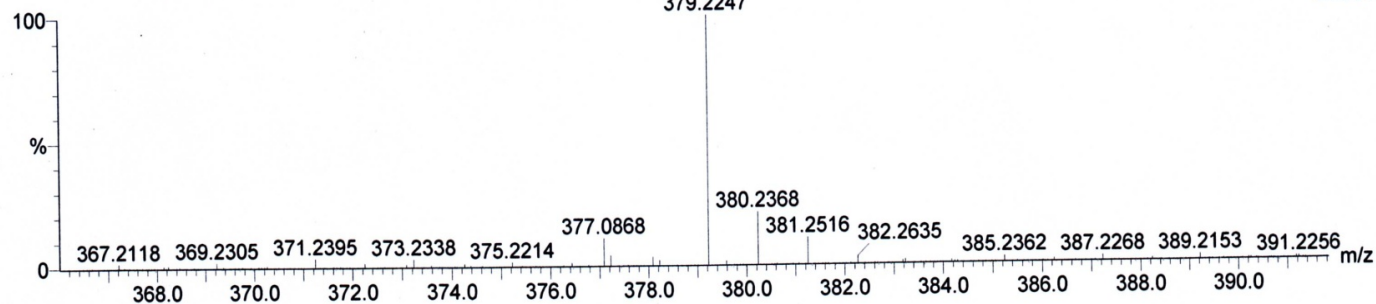

| Mass     | RA     | Calc. Mass | mDa  | PPM  | DBE | i-FIT  | Formula       |
|----------|--------|------------|------|------|-----|--------|---------------|
| 379.2247 | 100.00 | 379.2249   | -0.2 | -0.5 | 7.5 | 1299.5 | C23 H32 O3 Na |

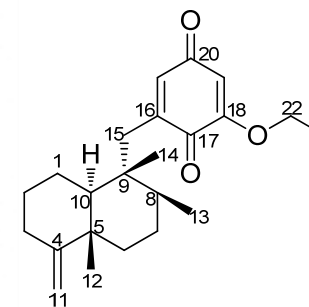

**5**

**Figure S52.** HRESIMS of (5*S*,8*S*,9*R*,10*S*)-18-ethoxyneoavarone (**5**).

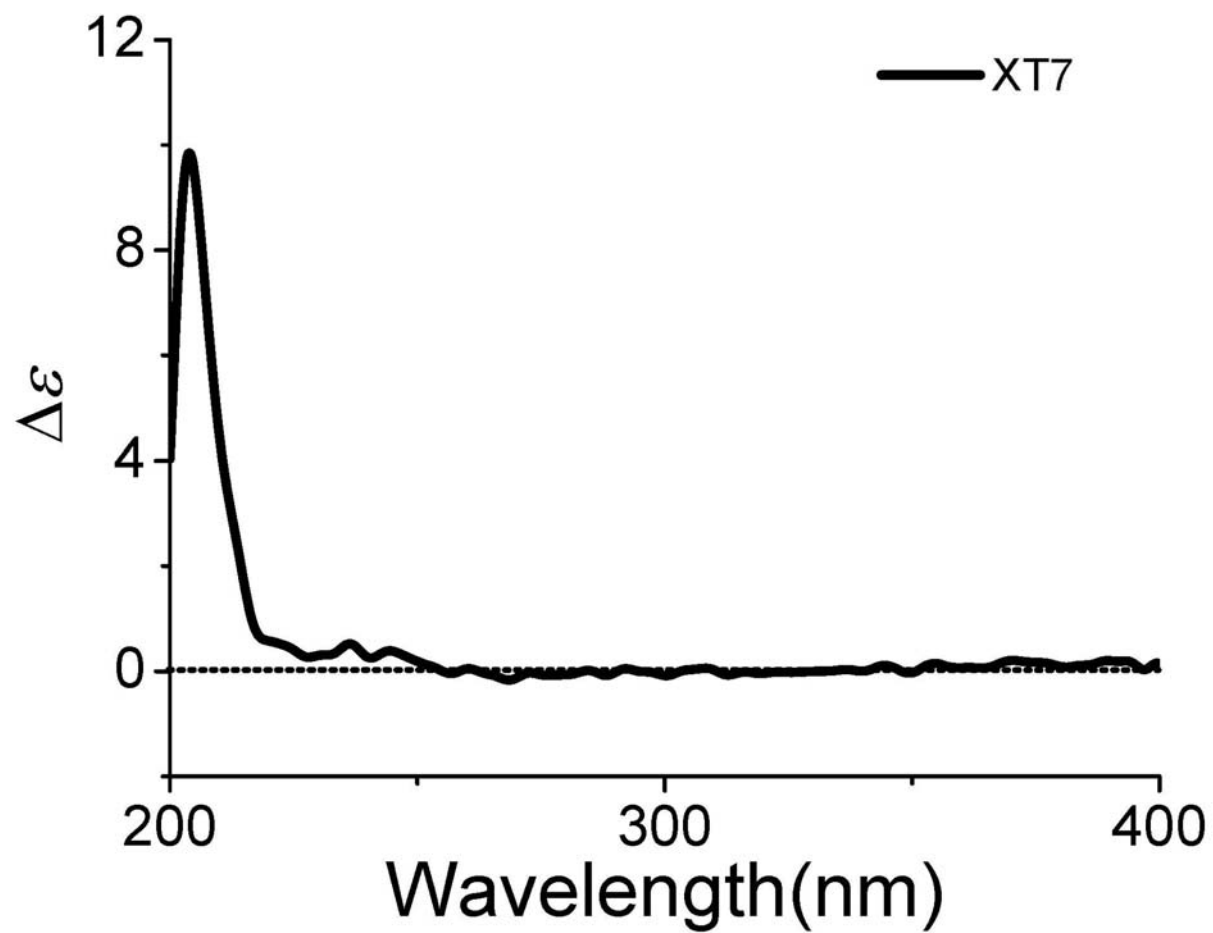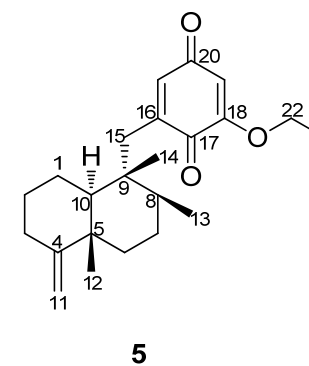

**Figure S53.** CD Spectrum of (5*S*,8*S*,9*R*,10*S*)-18-ethoxylneoavarone (**5**) in MeOH.

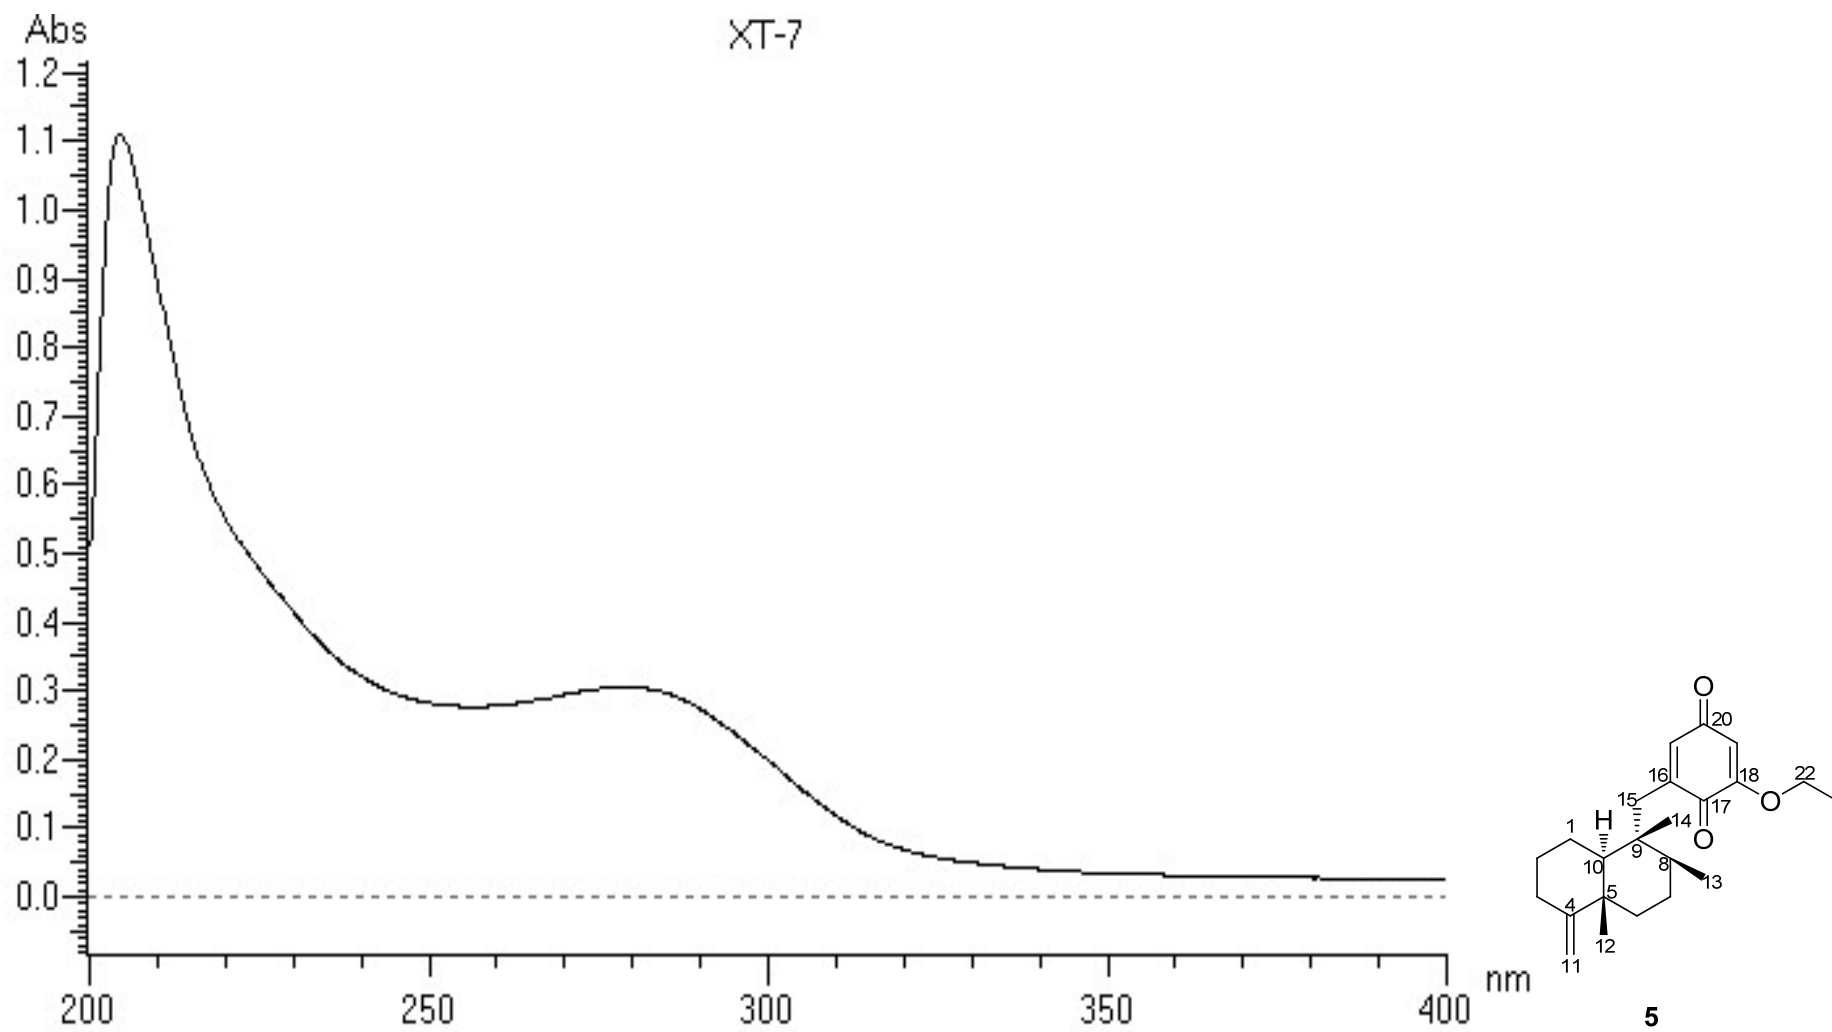

**Figure S54.** UV Spectrum of (5*S*,8*S*,9*R*,10*S*)-18-ethoxyneoavarone (**5**).

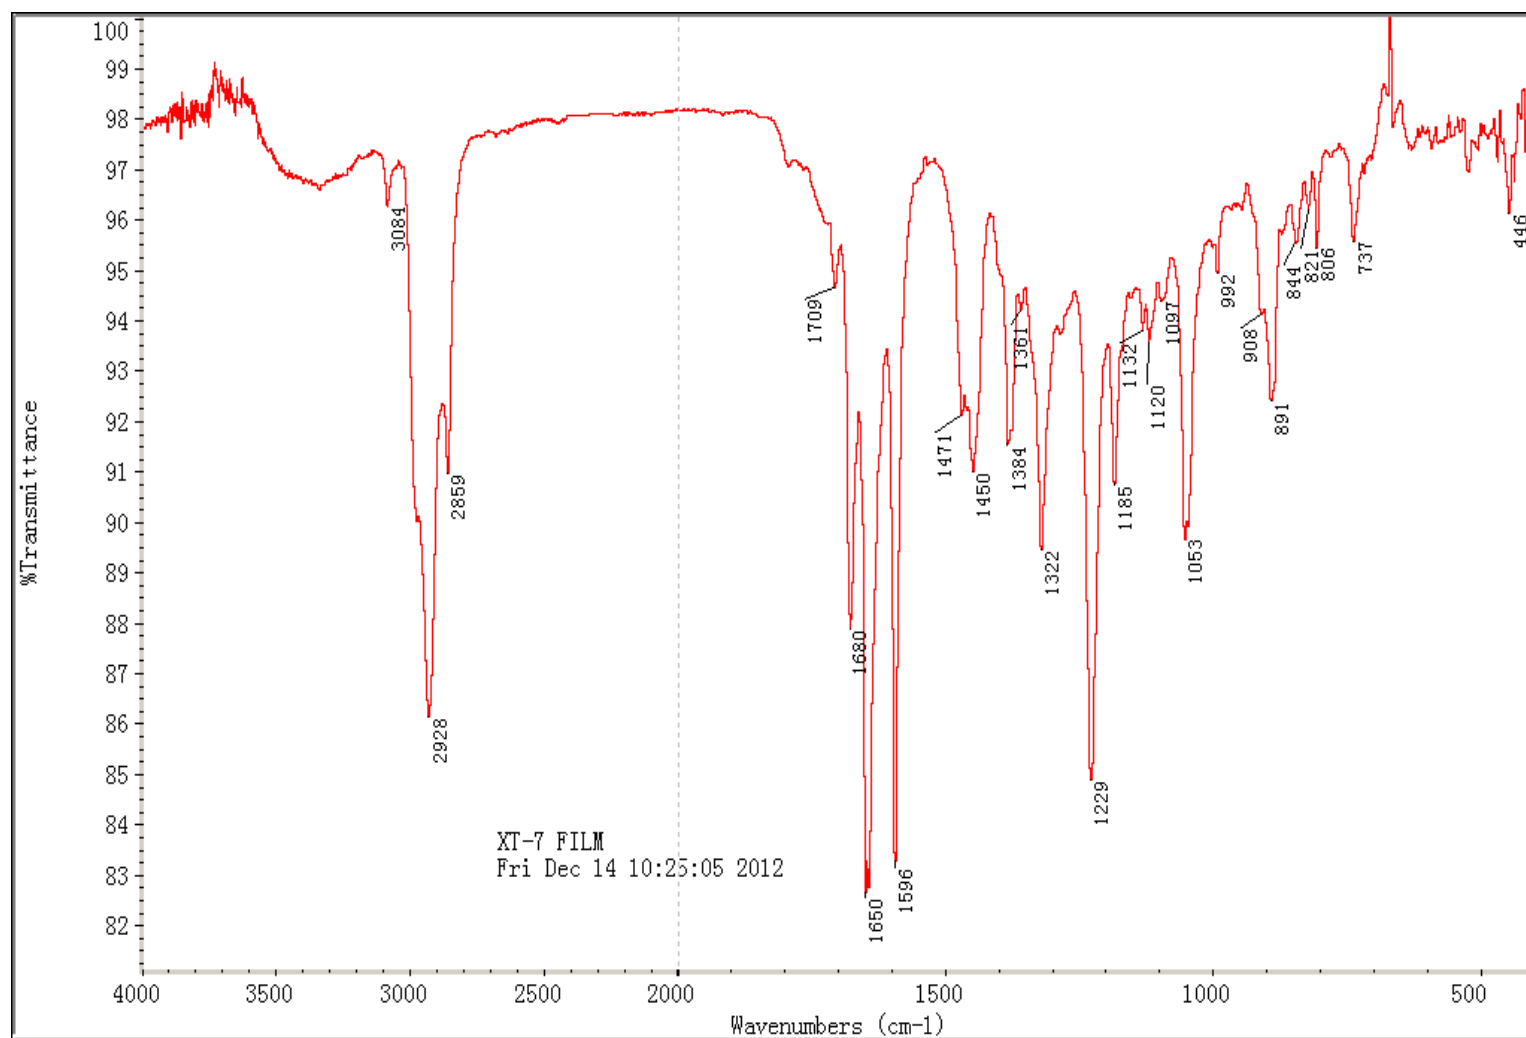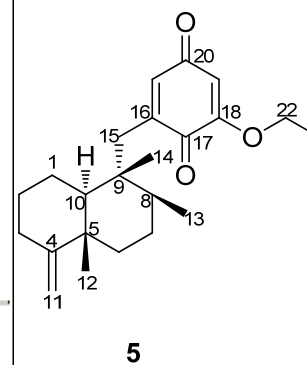

**Figure S55.** IR Spectrum of (5*S*,8*S*,9*R*,10*S*)-18-ethoxyneovarone (**5**).

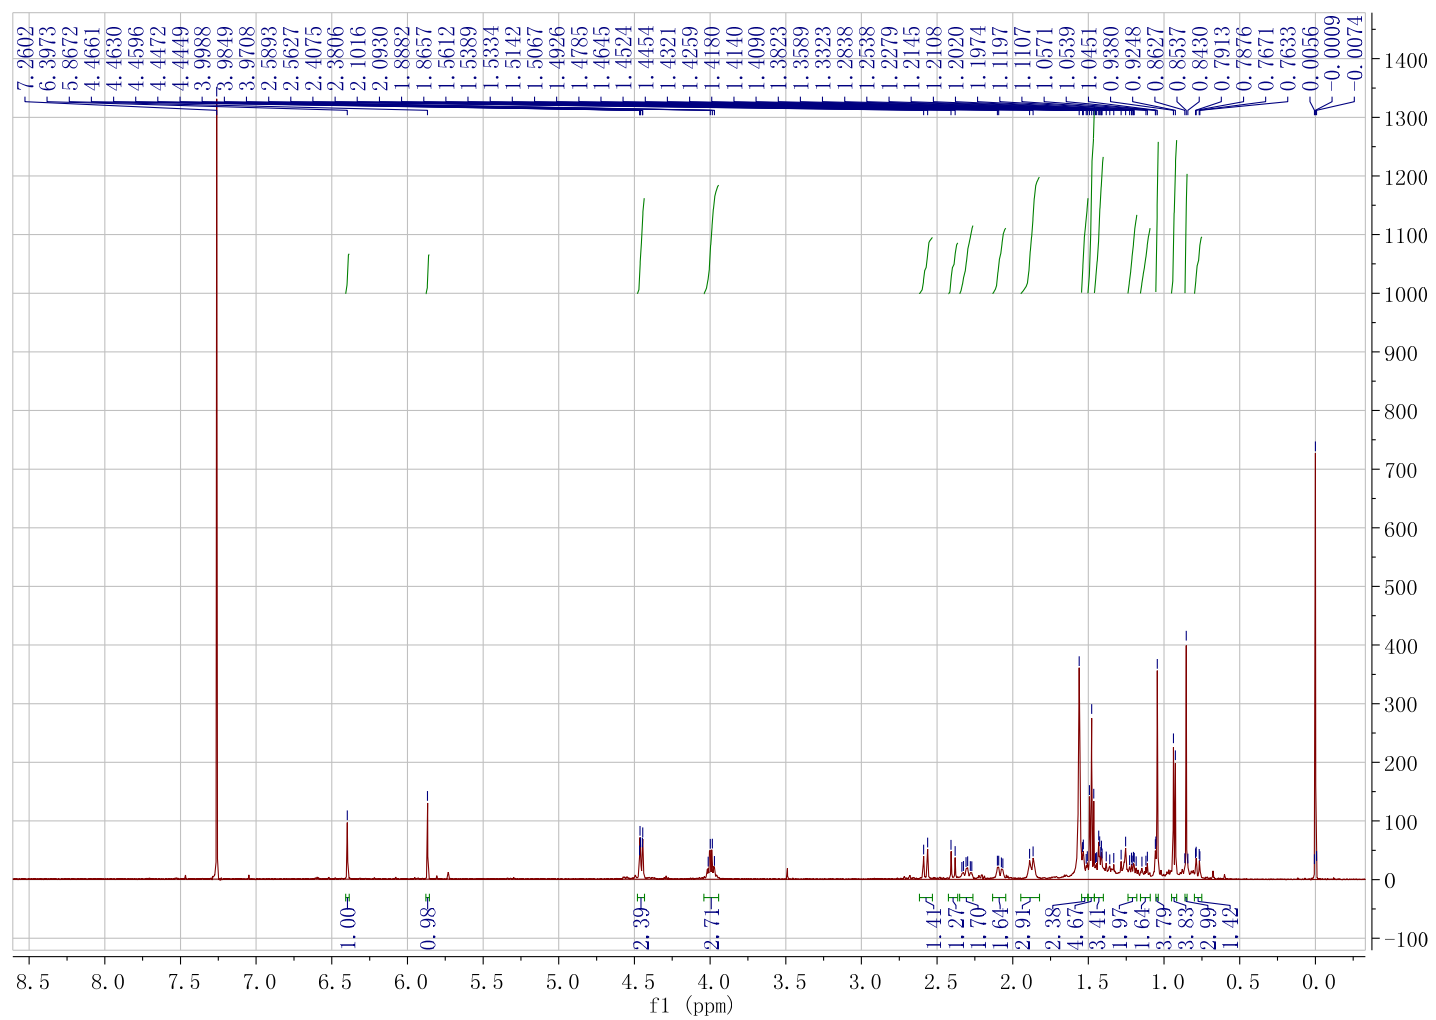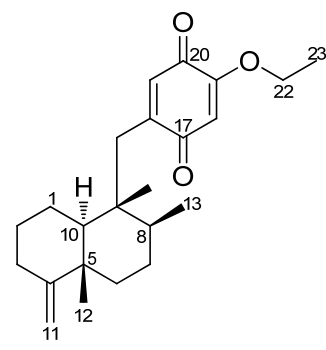

**Figure S56.**  $^1\text{H}$  NMR Spectrum of (5*S*,8*S*,9*R*,10*S*)-19-ethoxylneoavarone (**6**).

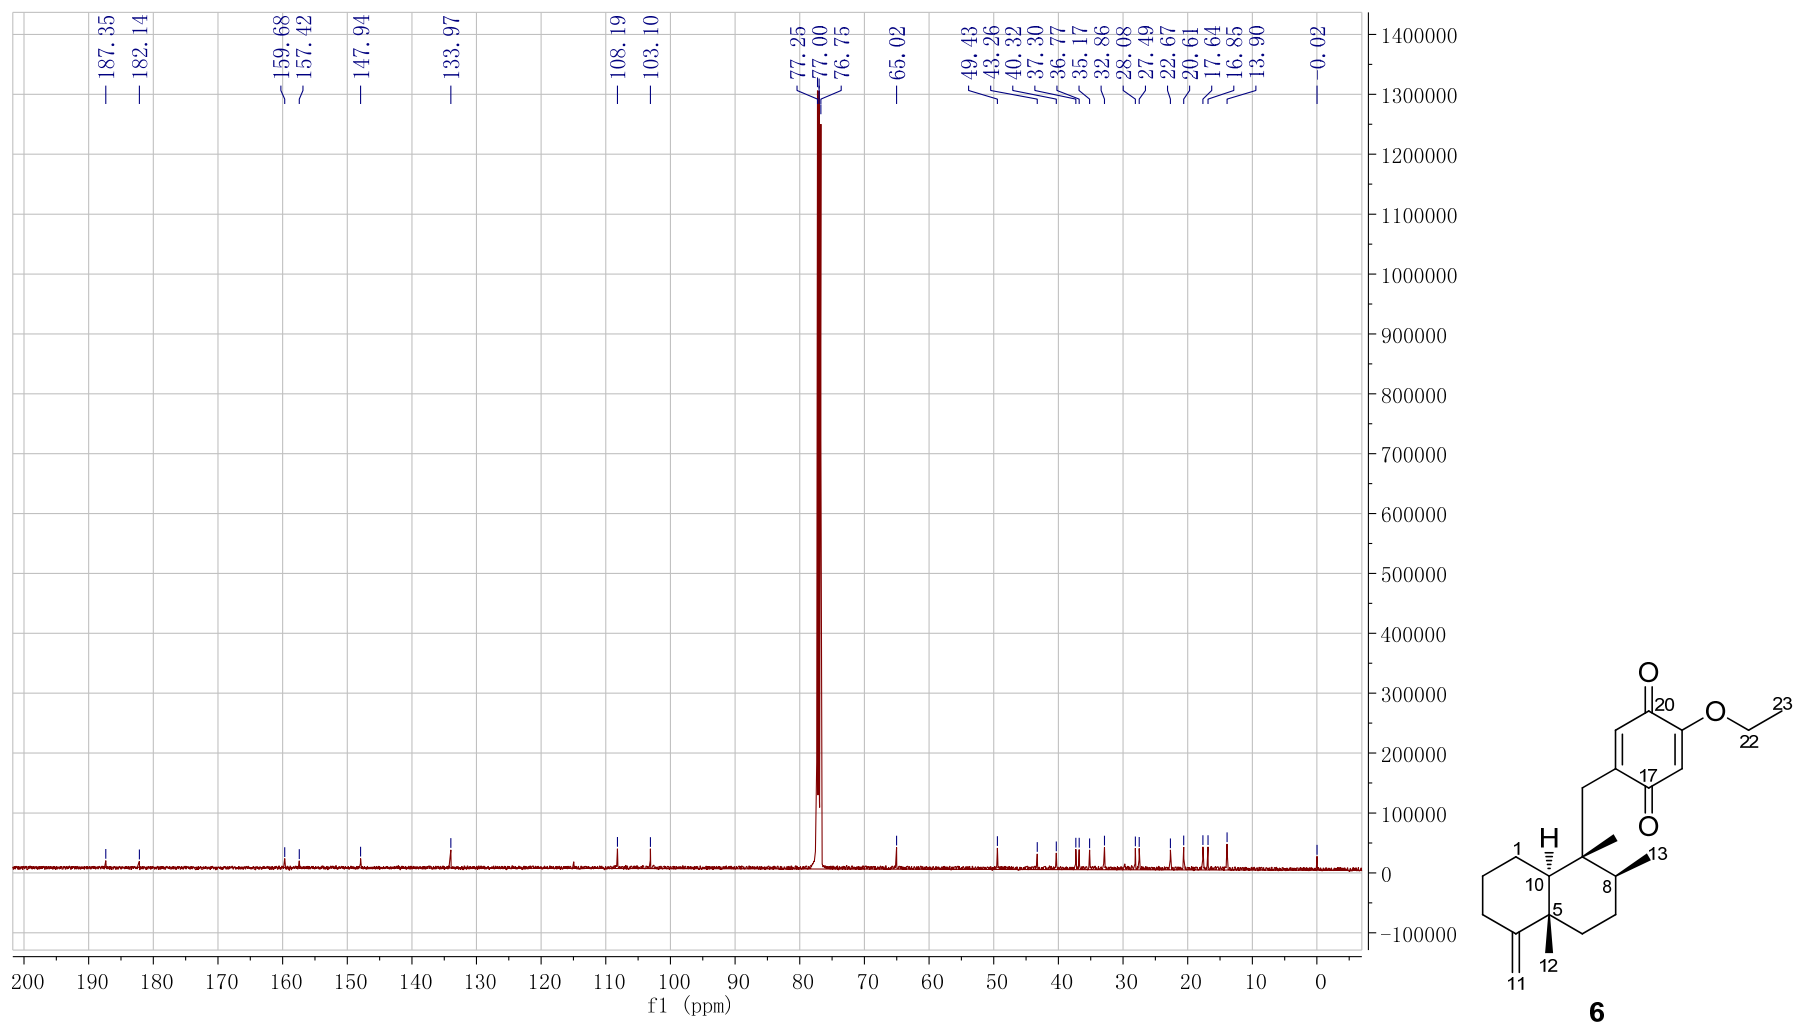

**Figure S57.**  $^{13}\text{C}$  NMR Spectrum of (5*S*,8*S*,9*R*,10*S*)-19-ethoxyneoavarone (**6**).

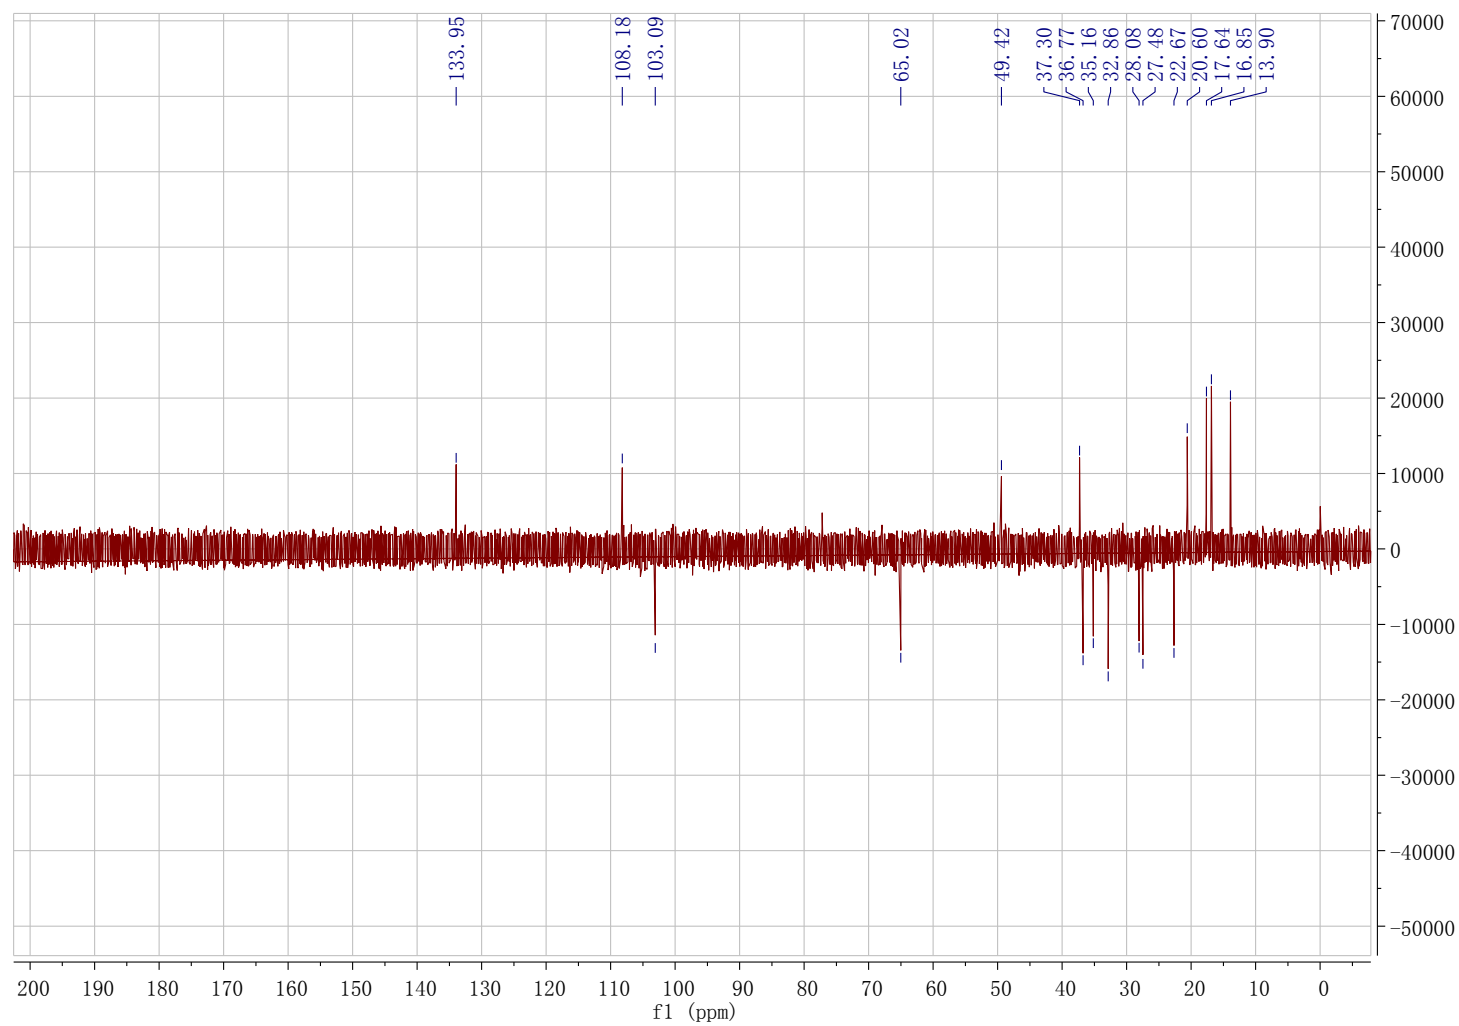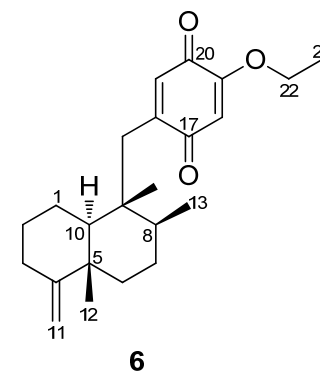

**Figure S58.** DEPT135 Spectrum of (5*S*,8*S*,9*R*,10*S*)-19-ethoxyneoavarone (**6**).



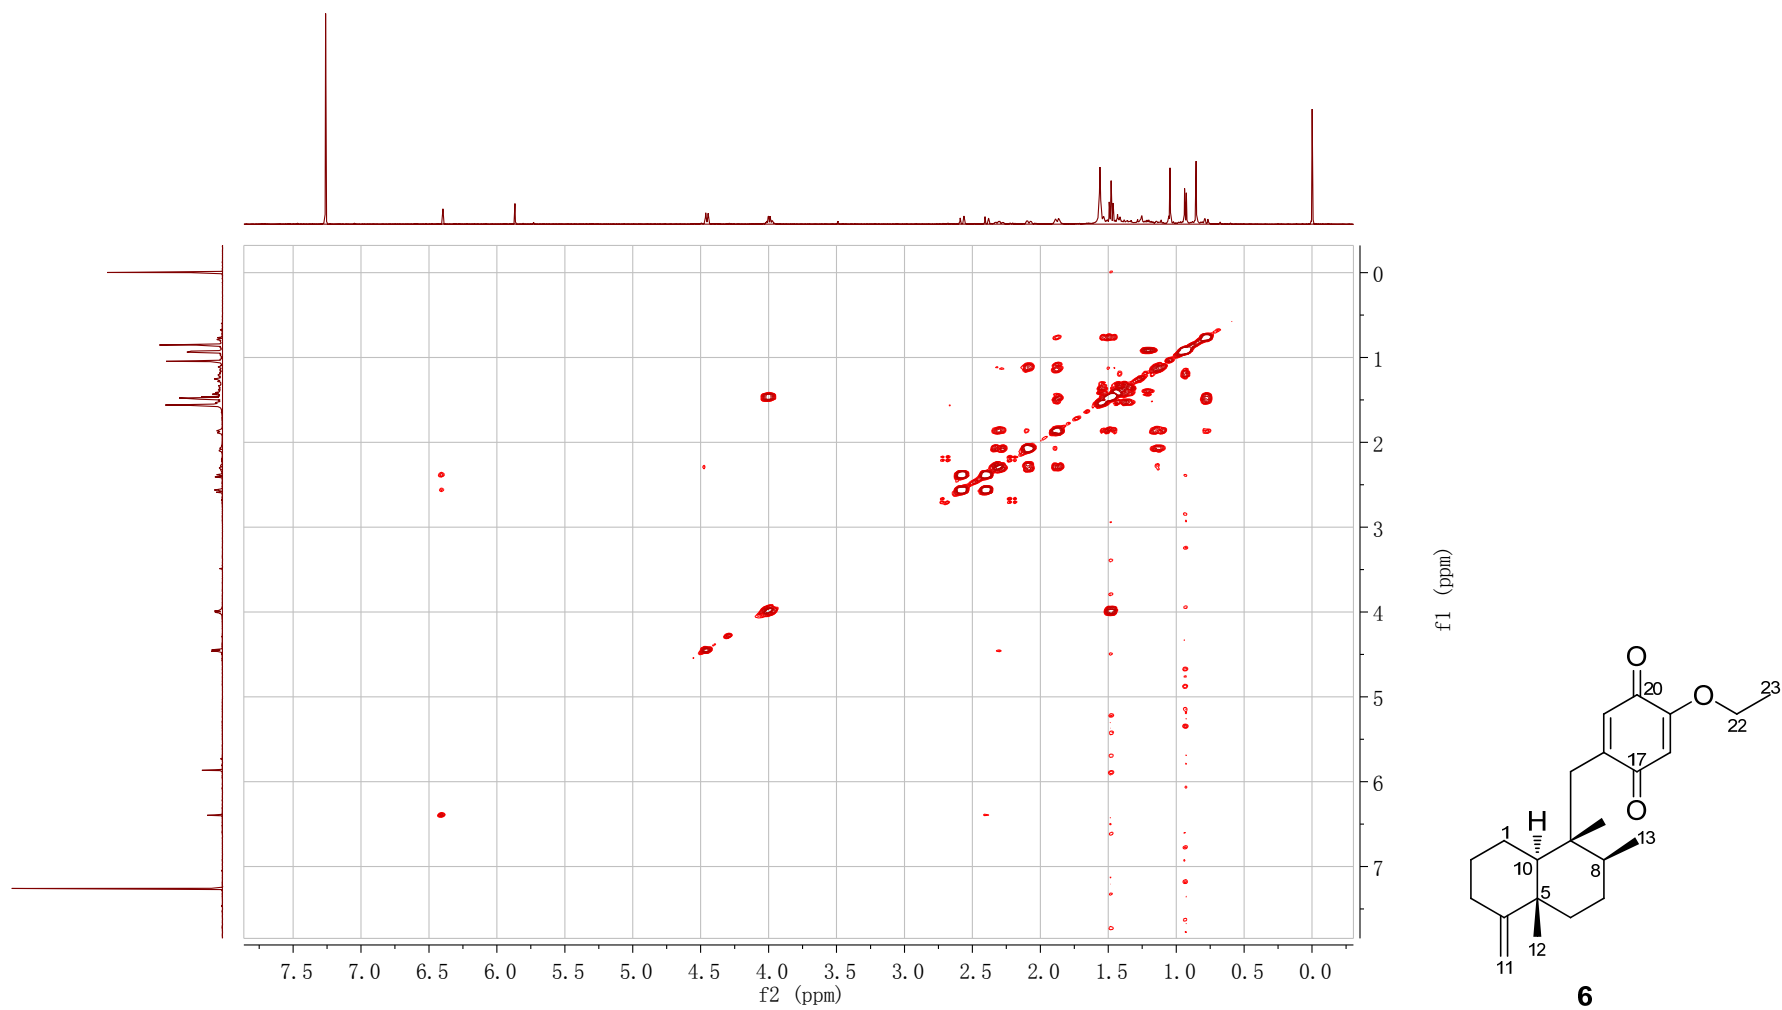

**Figure S59.**  $^1\text{H}$ - $^1\text{H}$  COSY Spectrum of (5*S*,8*S*,9*R*,10*S*)-19-ethoxyneoavarone (**6**).

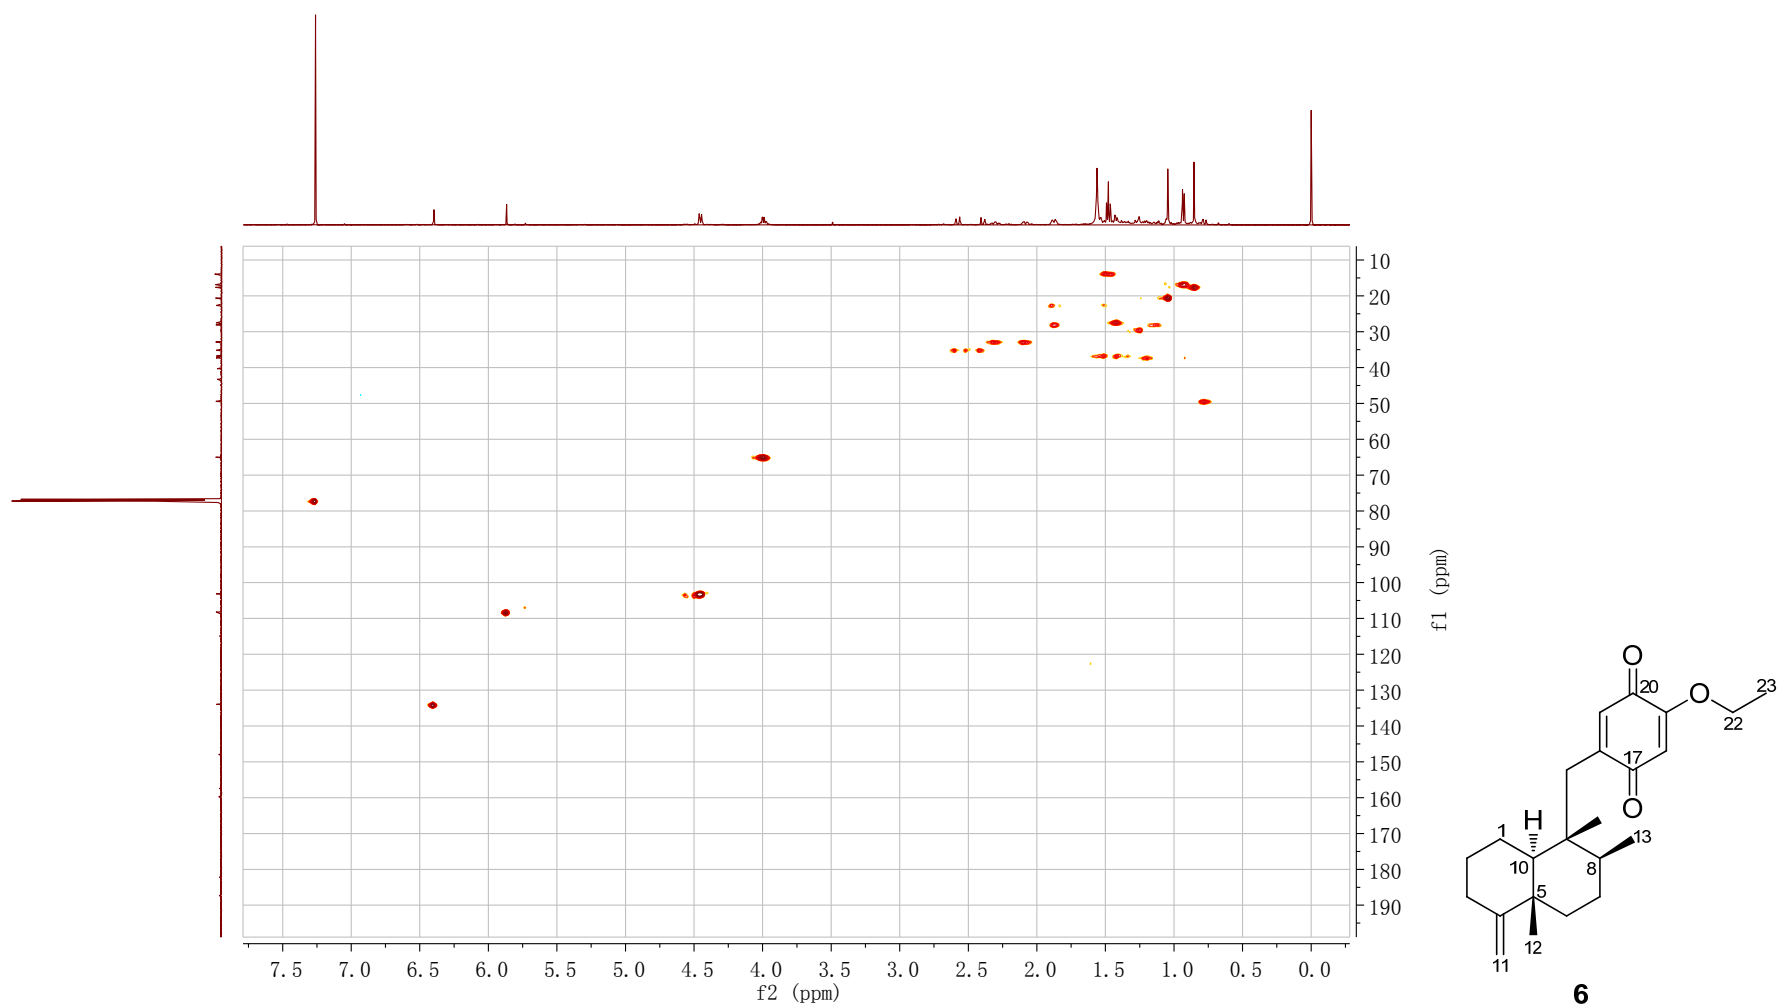

**Figure S60.** HSQC Spectrum of (5*S*,8*S*,9*R*,10*S*)-19-ethoxyneoavarone (**6**).

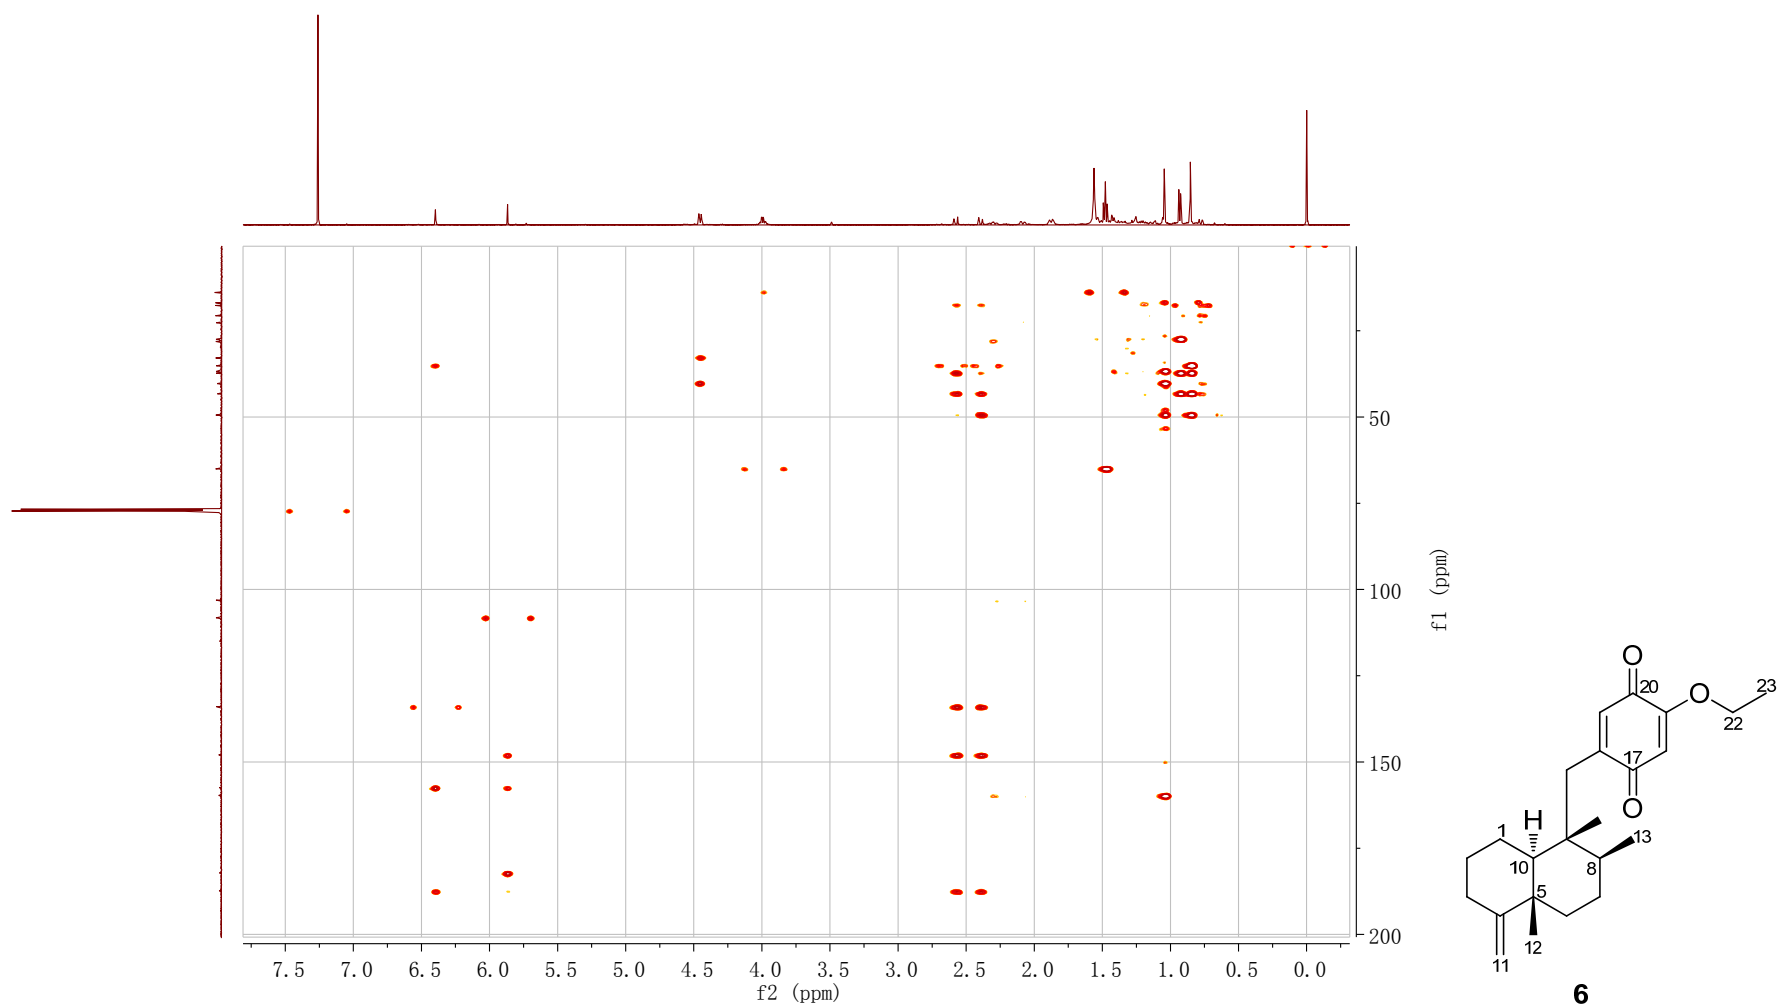

**Figure S61.** HMBC Spectrum of (5*S*,8*S*,9*R*,10*S*)-19-ethoxyneovarone (**6**).

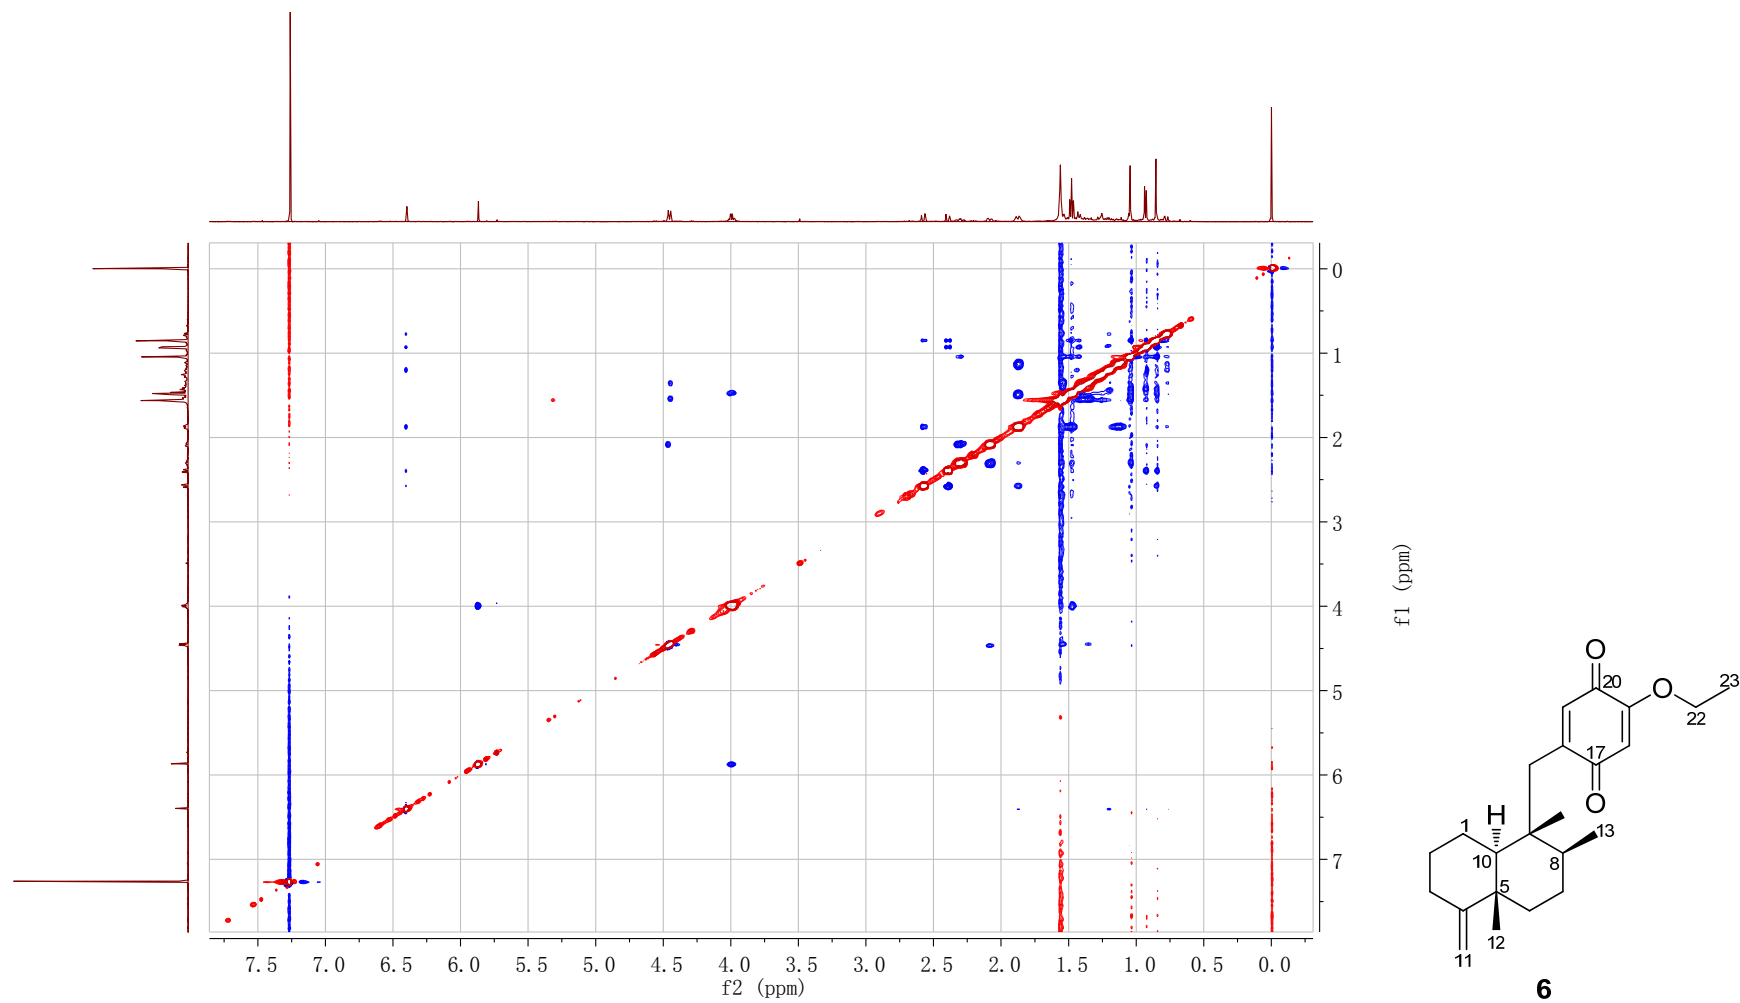

**Figure S62.** NOESY Spectrum of (5*S*,8*S*,9*R*,10*S*)-19-ethoxyneovarone (**6**).

Elemental Composition Report XT-4

Page 1

Tolerance = 20.0 PPM / DBE: min = -1.5, max = 50.0  
 Selected filters: None

Monoisotopic Mass, Even Electron Ions  
 13 formula(e) evaluated with 1 results within limits (up to 50 closest results for each mass)  
 Elements Used:

C: 10-25 H: 10-40 O: 1-6 Na: 1-1

SIPI  
 XT-4 M.W=356  
 WQ12-321H 30 (1.056) AM (Cen,4, 80.00, Ar,5000.0,376.07,0.70); Sm (SG, 2x1.00); Cm (22:30)

16-Jul-2012,14:33:28

TOF MS ES+  
 2.56e4

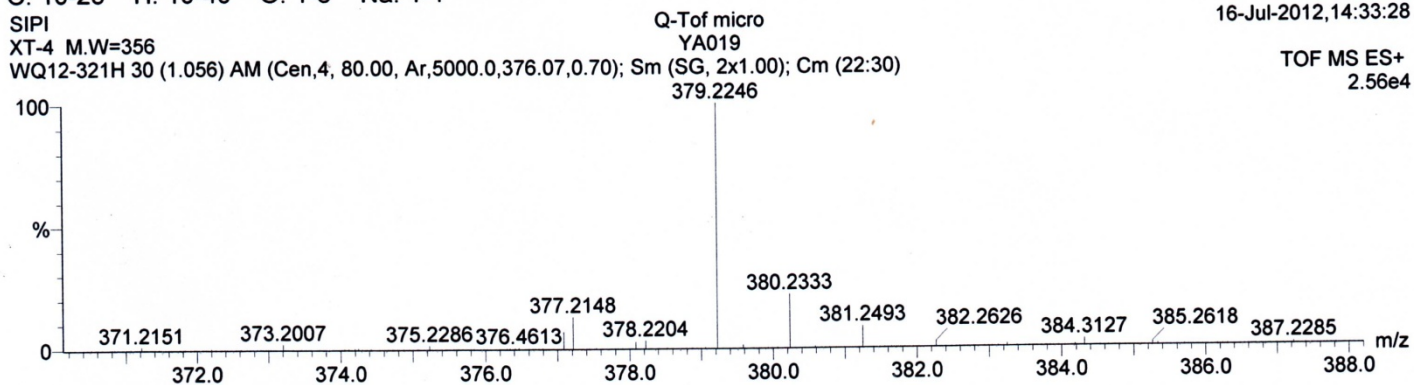

Minimum: 70.00  
 Maximum: 100.00

| Mass     | RA     | Calc. Mass | mDa  | PPM  | DBE | i-FIT | Formula       |
|----------|--------|------------|------|------|-----|-------|---------------|
| 379.2246 | 100.00 | 379.2249   | -0.3 | -0.8 | 7.5 | 448.3 | C23 H32 O3 Na |

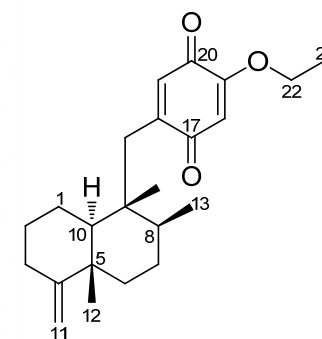

6

Figure S63. HRESIMS of 19-eth(5S,8S,9R,10S)-19-ethoxylneoavarone (6).

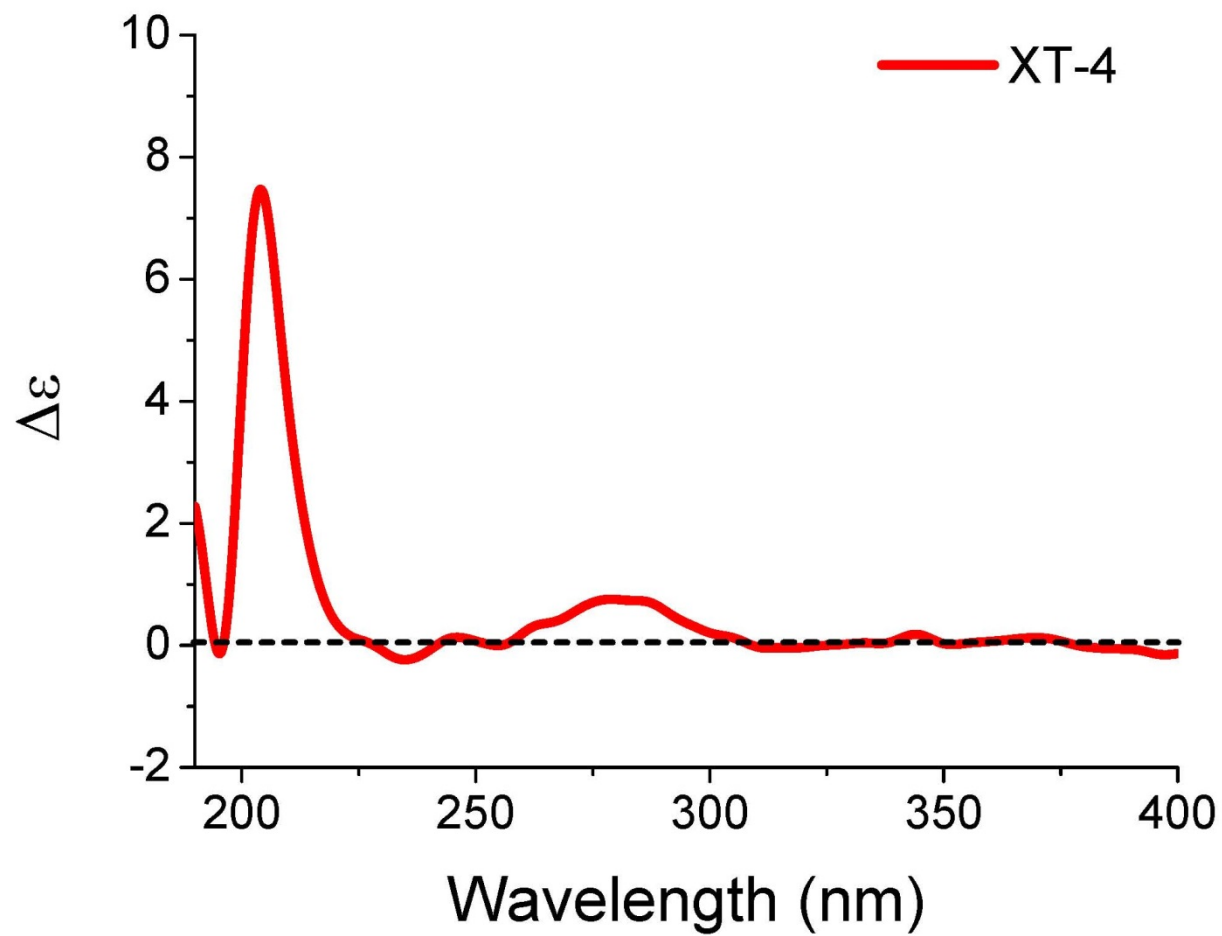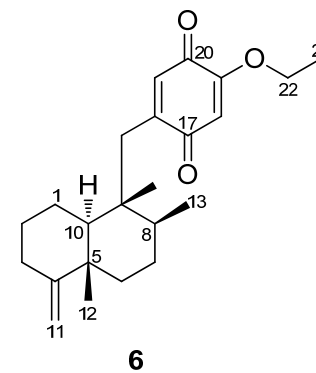

**Figure S64.** CD Spectrum of (5*S*,8*S*,9*R*,10*S*)-19-ethoxyneoavarone (**6**) in MeOH.

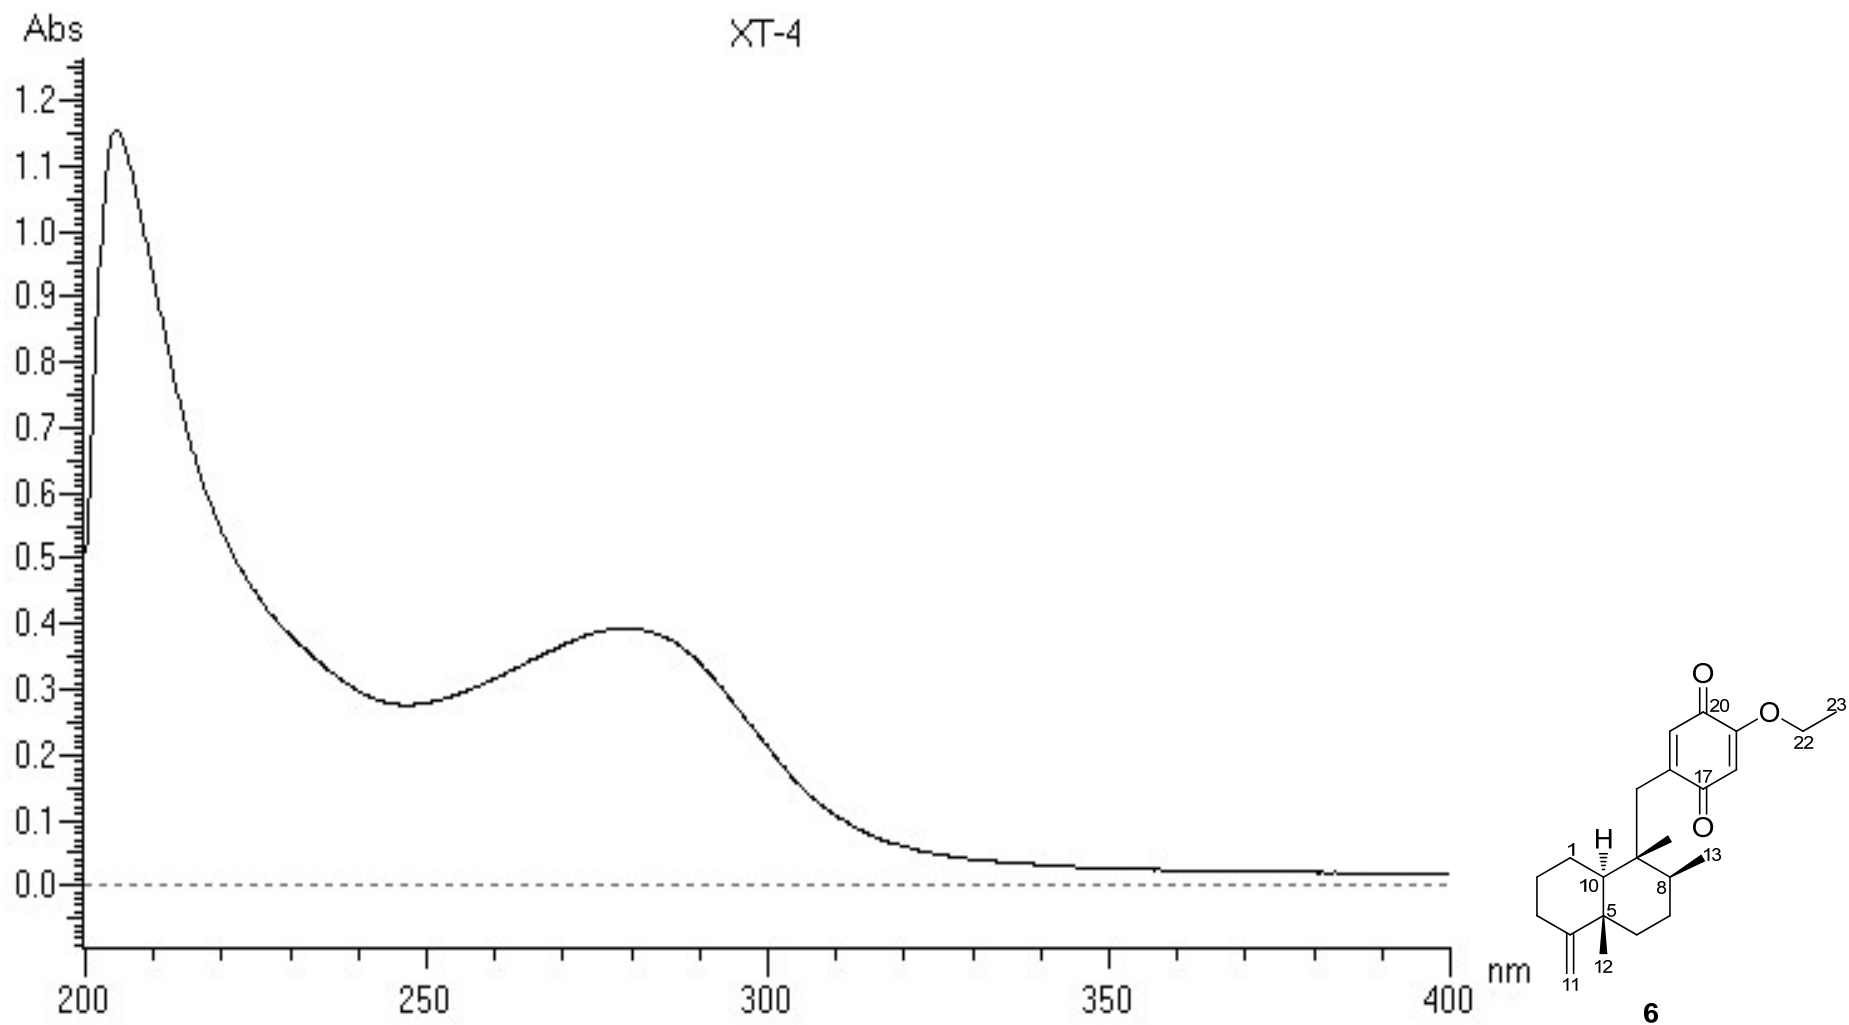

**Figure S65.** UV Spectrum of (5*S*,8*S*,9*R*,10*S*)-19-ethoxyneoavarone (**6**).

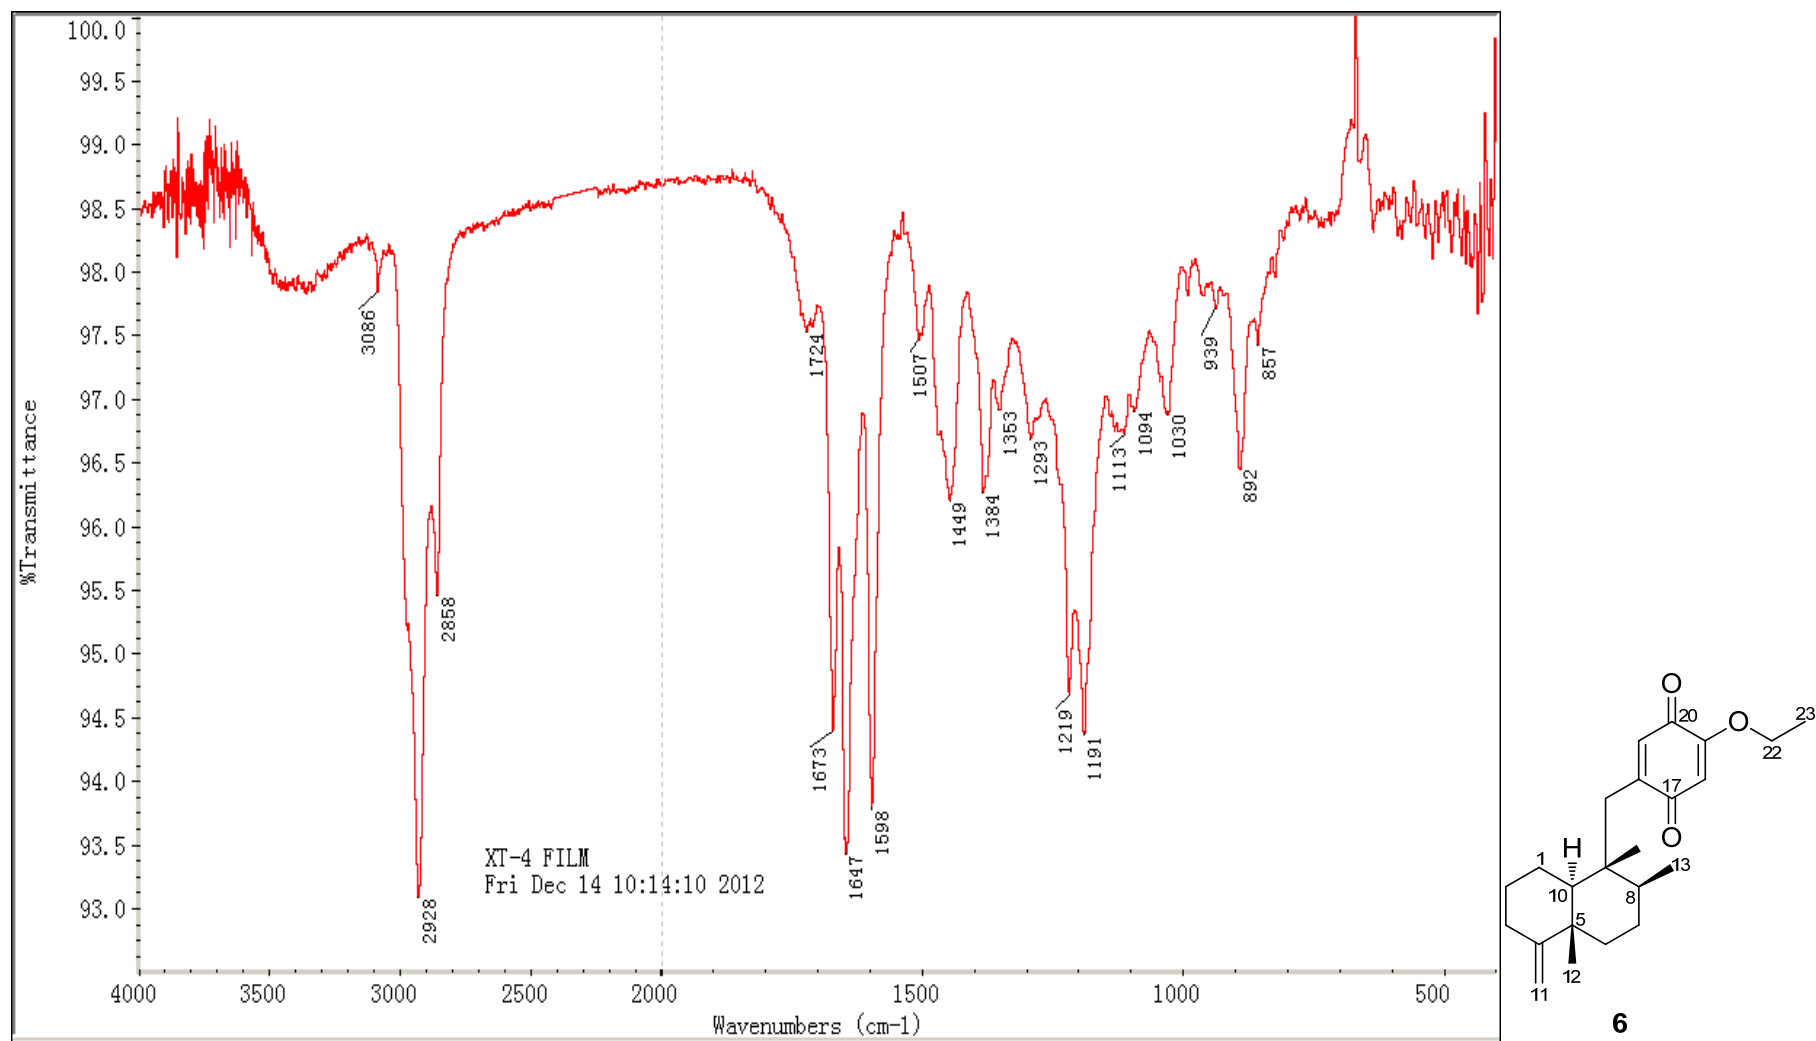

**Figure S66.** IR Spectrum of (5*S*,8*S*,9*R*,10*S*)-19-ethoxyneoavarone (**6**).



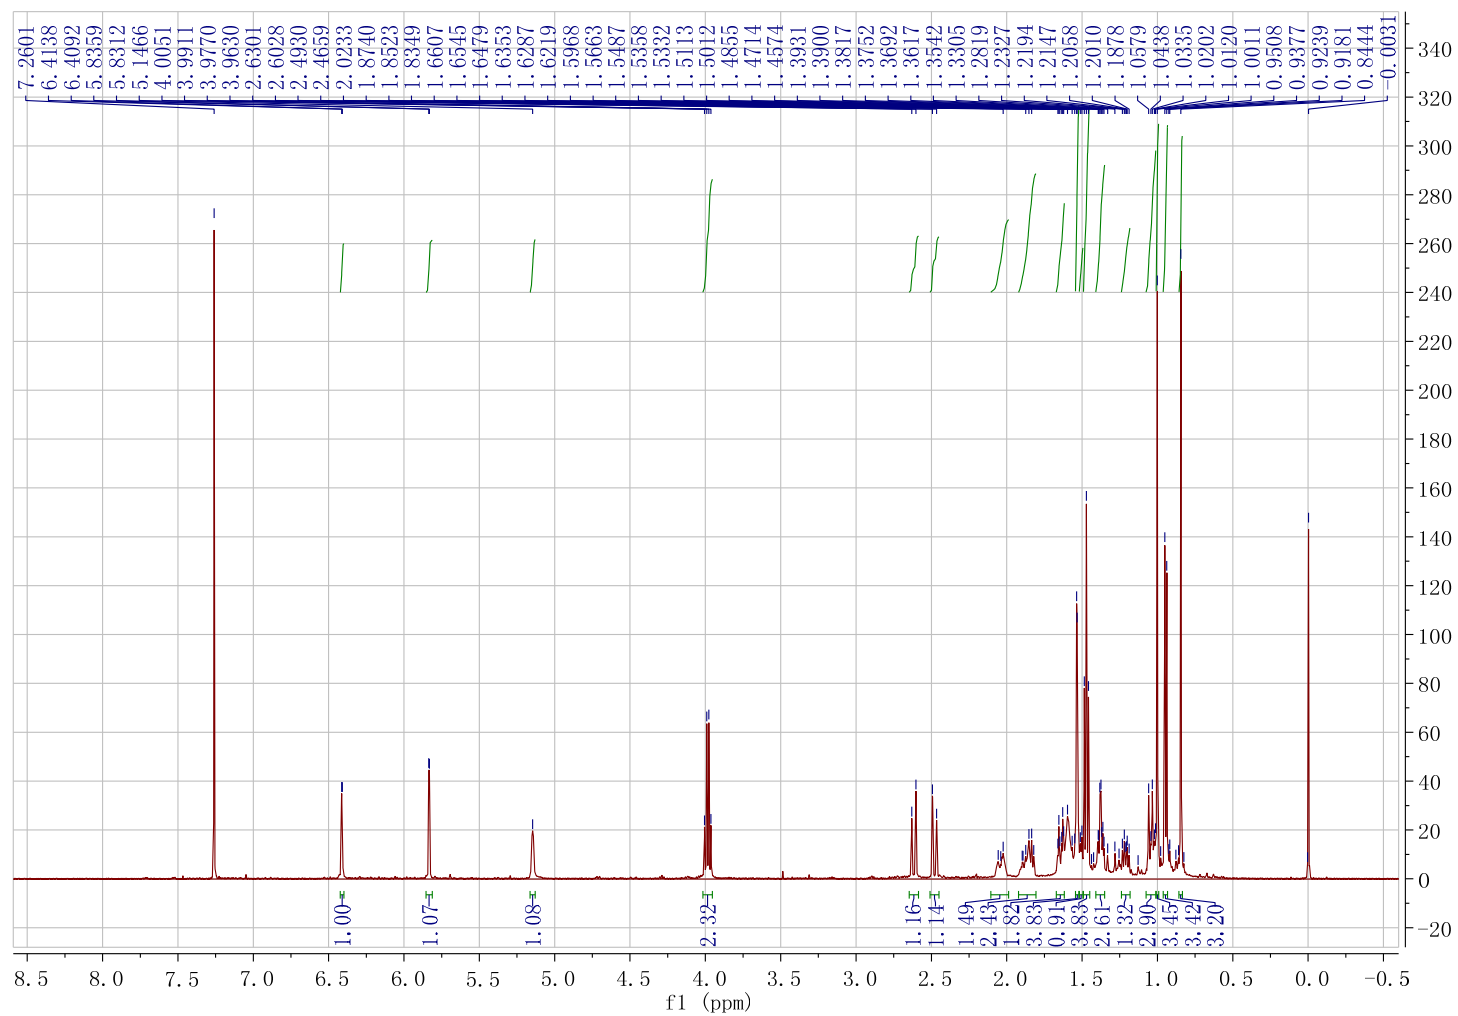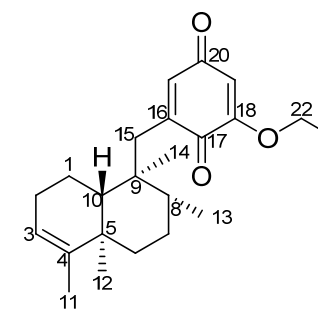

7

Figure S67.  $^1\text{H}$  NMR Spectrum of (5*R*,8*R*,9*S*,10*R*)-18-ethoxylavaronone (**7**).

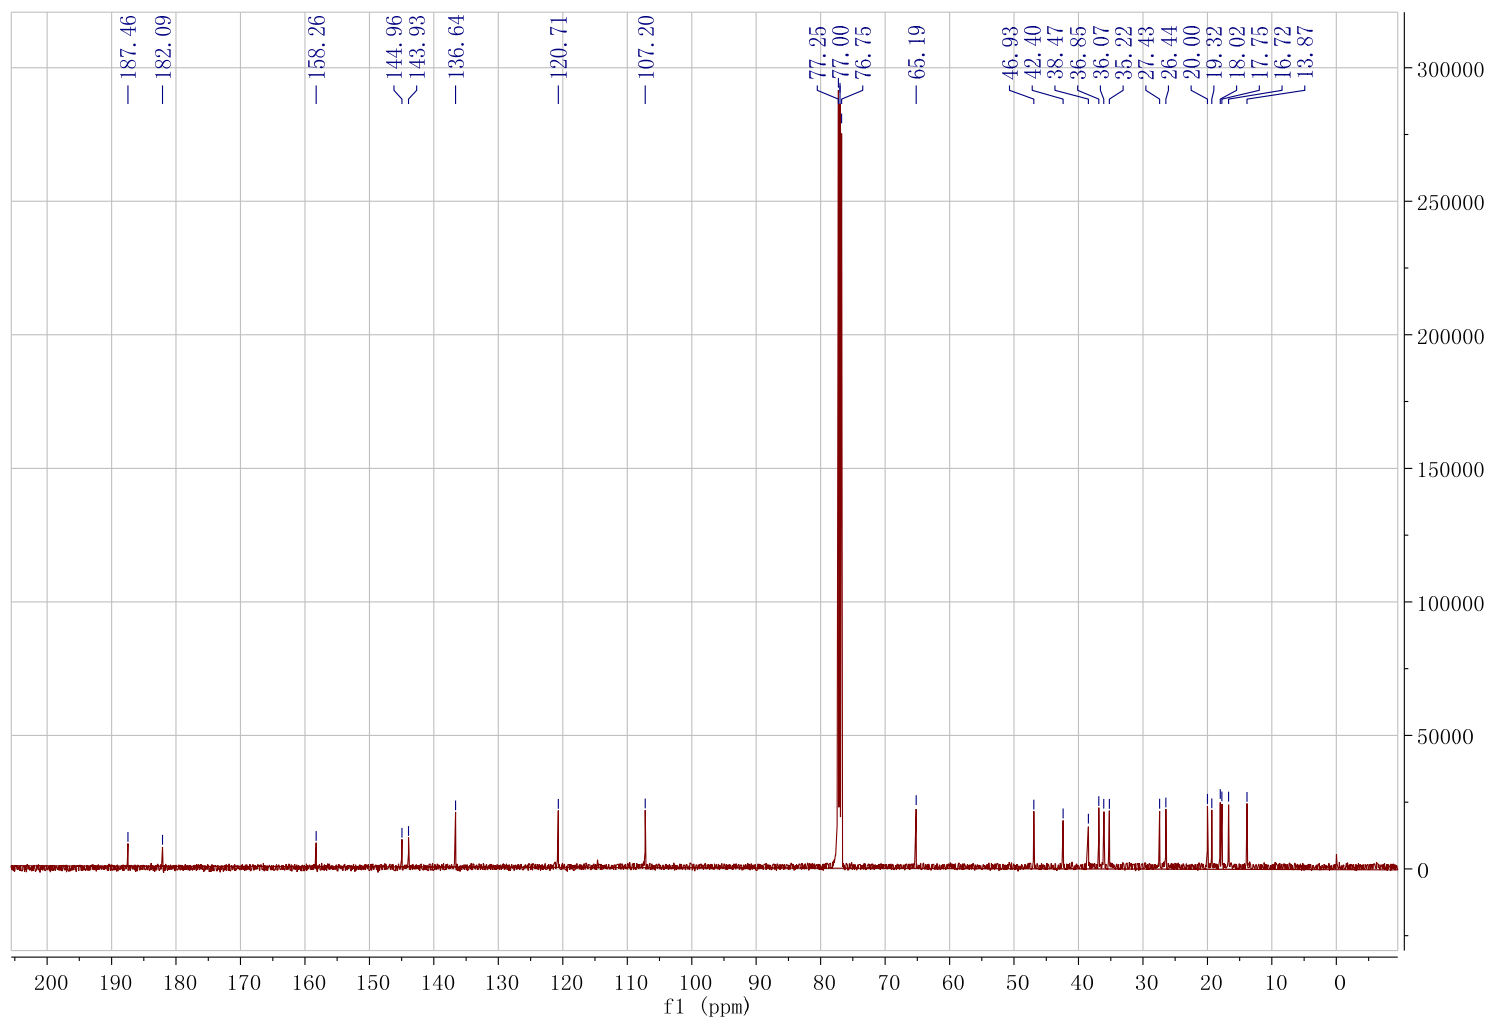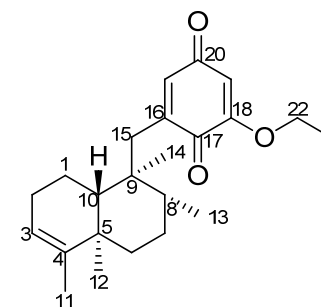

7

Figure S68.  $^{13}\text{C}$  NMR Spectrum of (5*R*,8*R*,9*S*,10*R*)-18-ethoxylavarone (**7**).

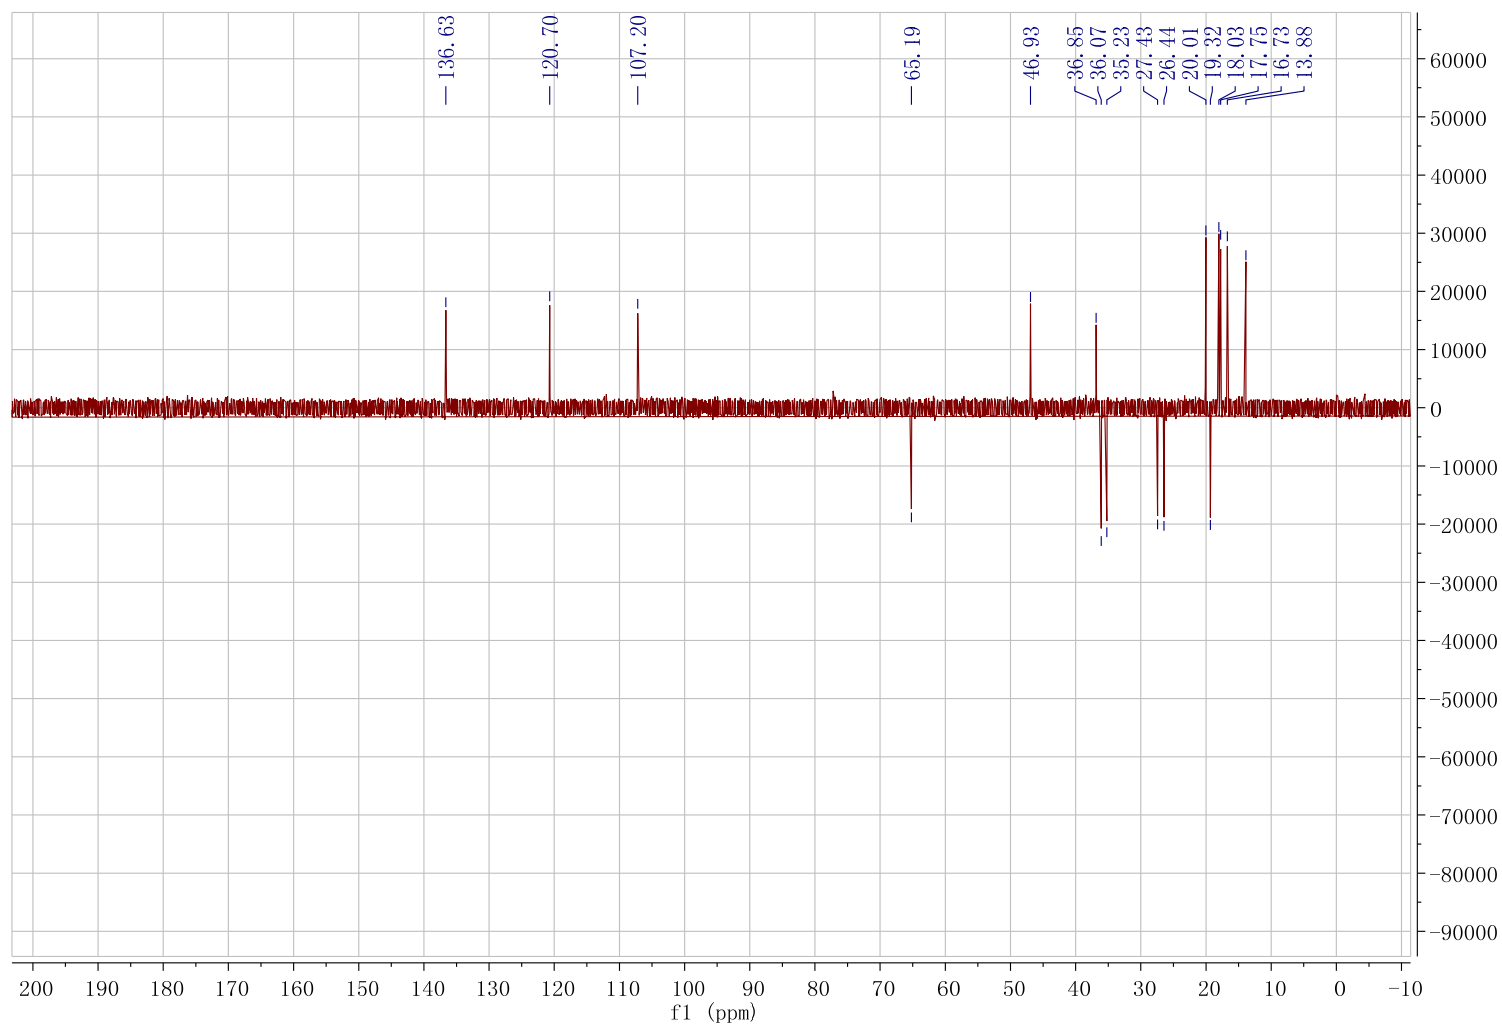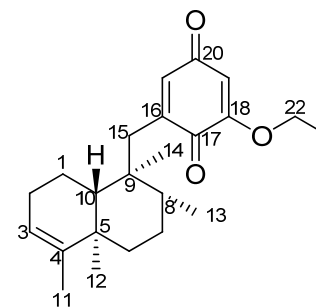

7

Figure S69. DEPT135 Spectrum of (5R,8R,9S,10R)-18-ethoxylavarone (7).

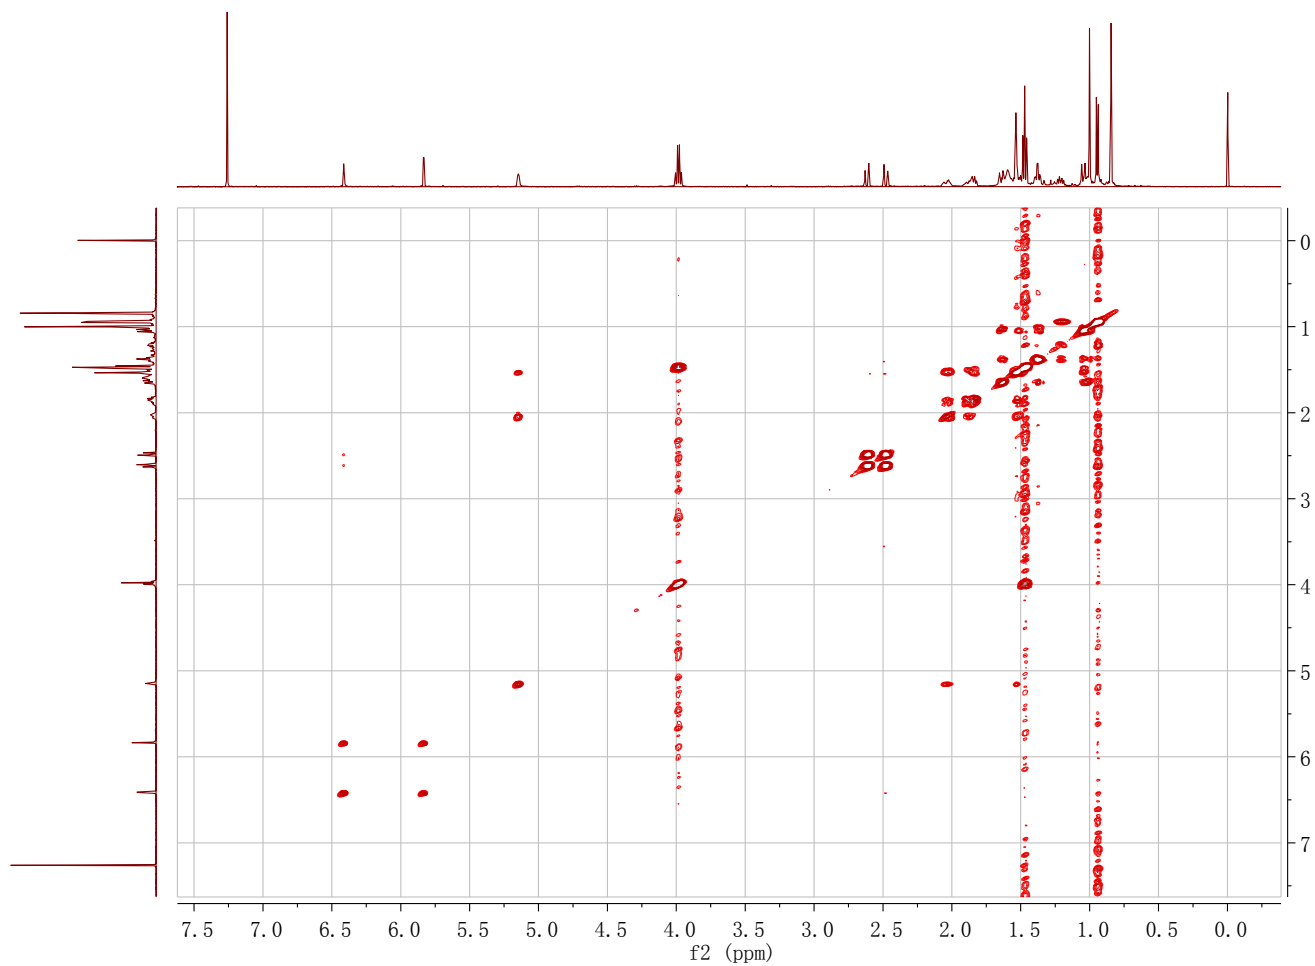

f1 (ppm)

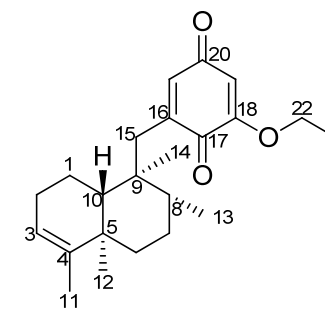

7

**Figure S70.**  $^1\text{H}$ - $^1\text{H}$  COSY Spectrum of (5*R*,8*R*,9*S*,10*R*)-18-ethoxylavarone (**7**).

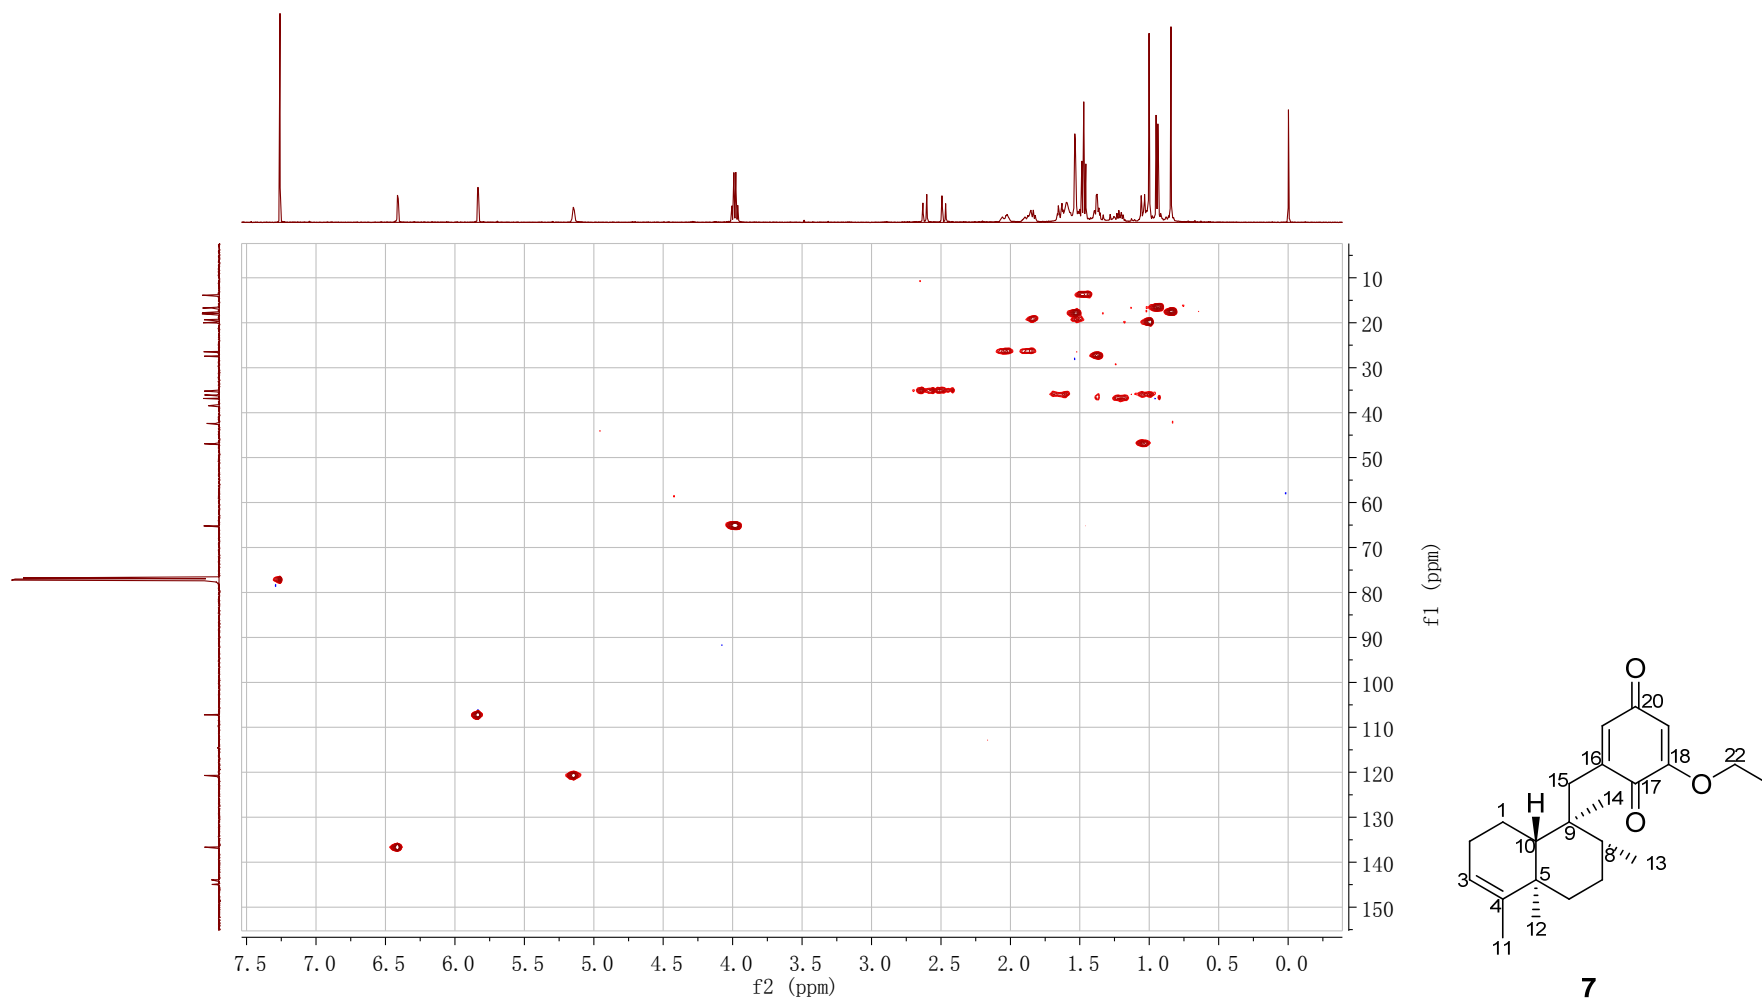

**Figure S71.** HSQC Spectrum of (5R,8R,9S,10R)-18-ethoxylavarone (**7**).

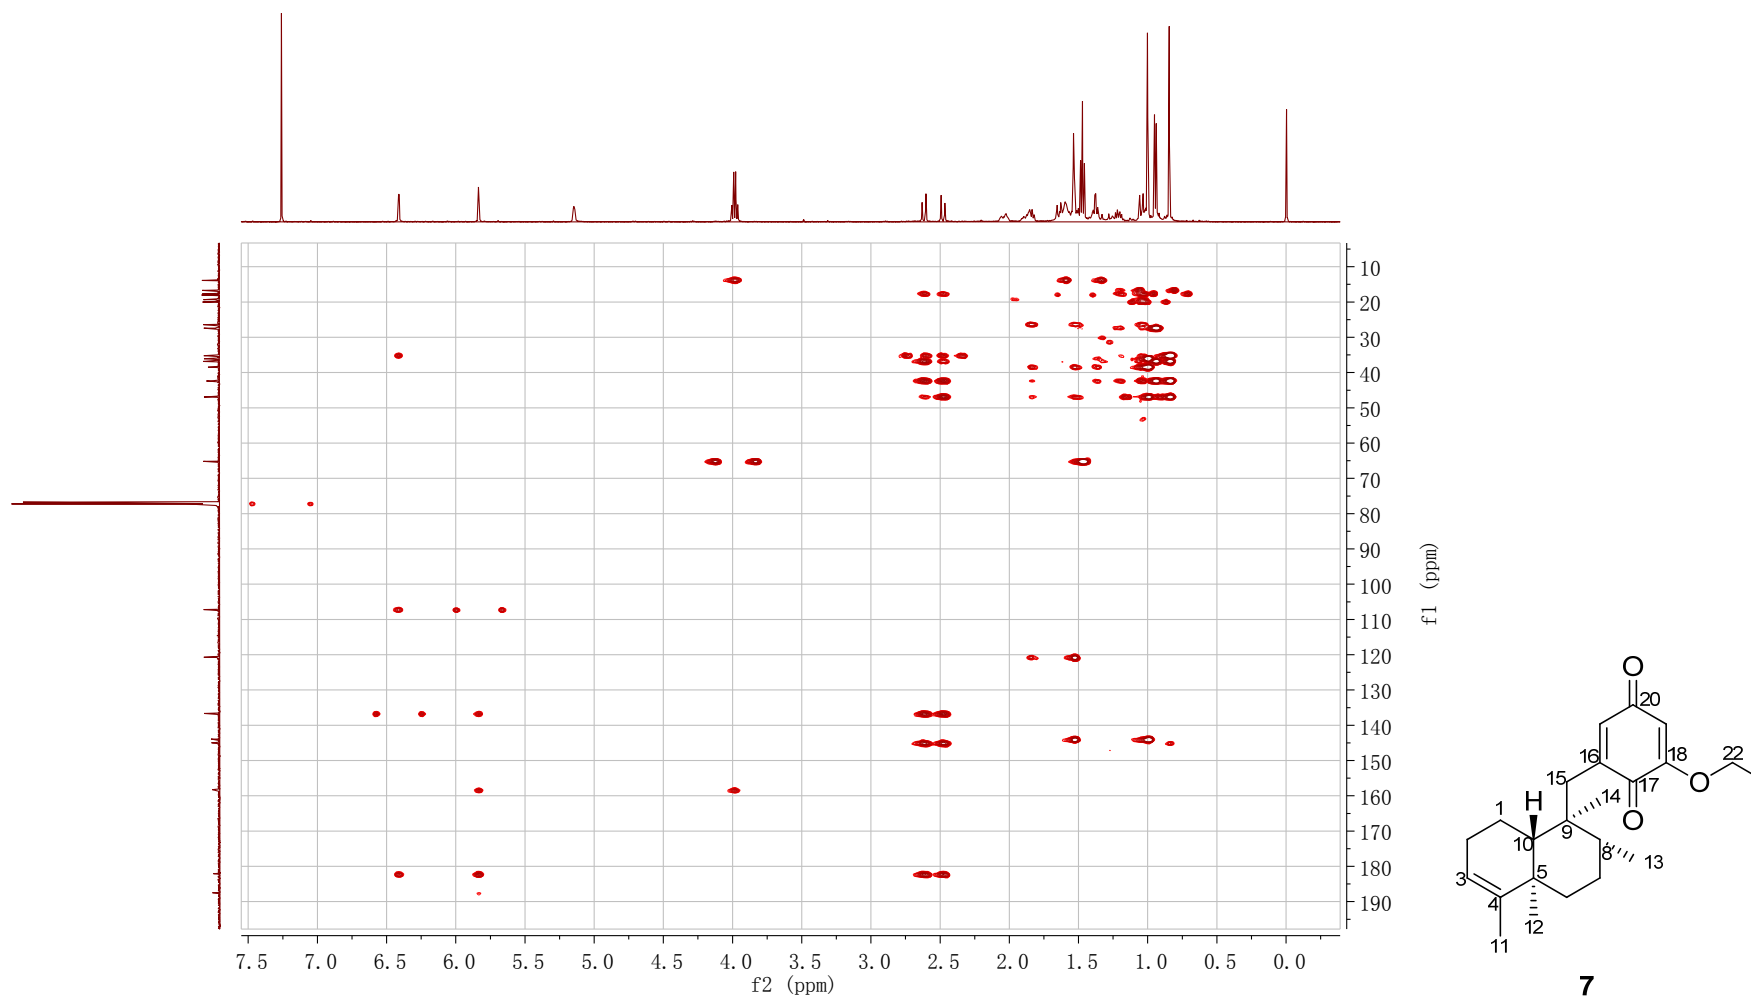

**Figure S72.** HMBC Spectrum of (5R,8R,9S,10R)-18-ethoxylavarone (7).

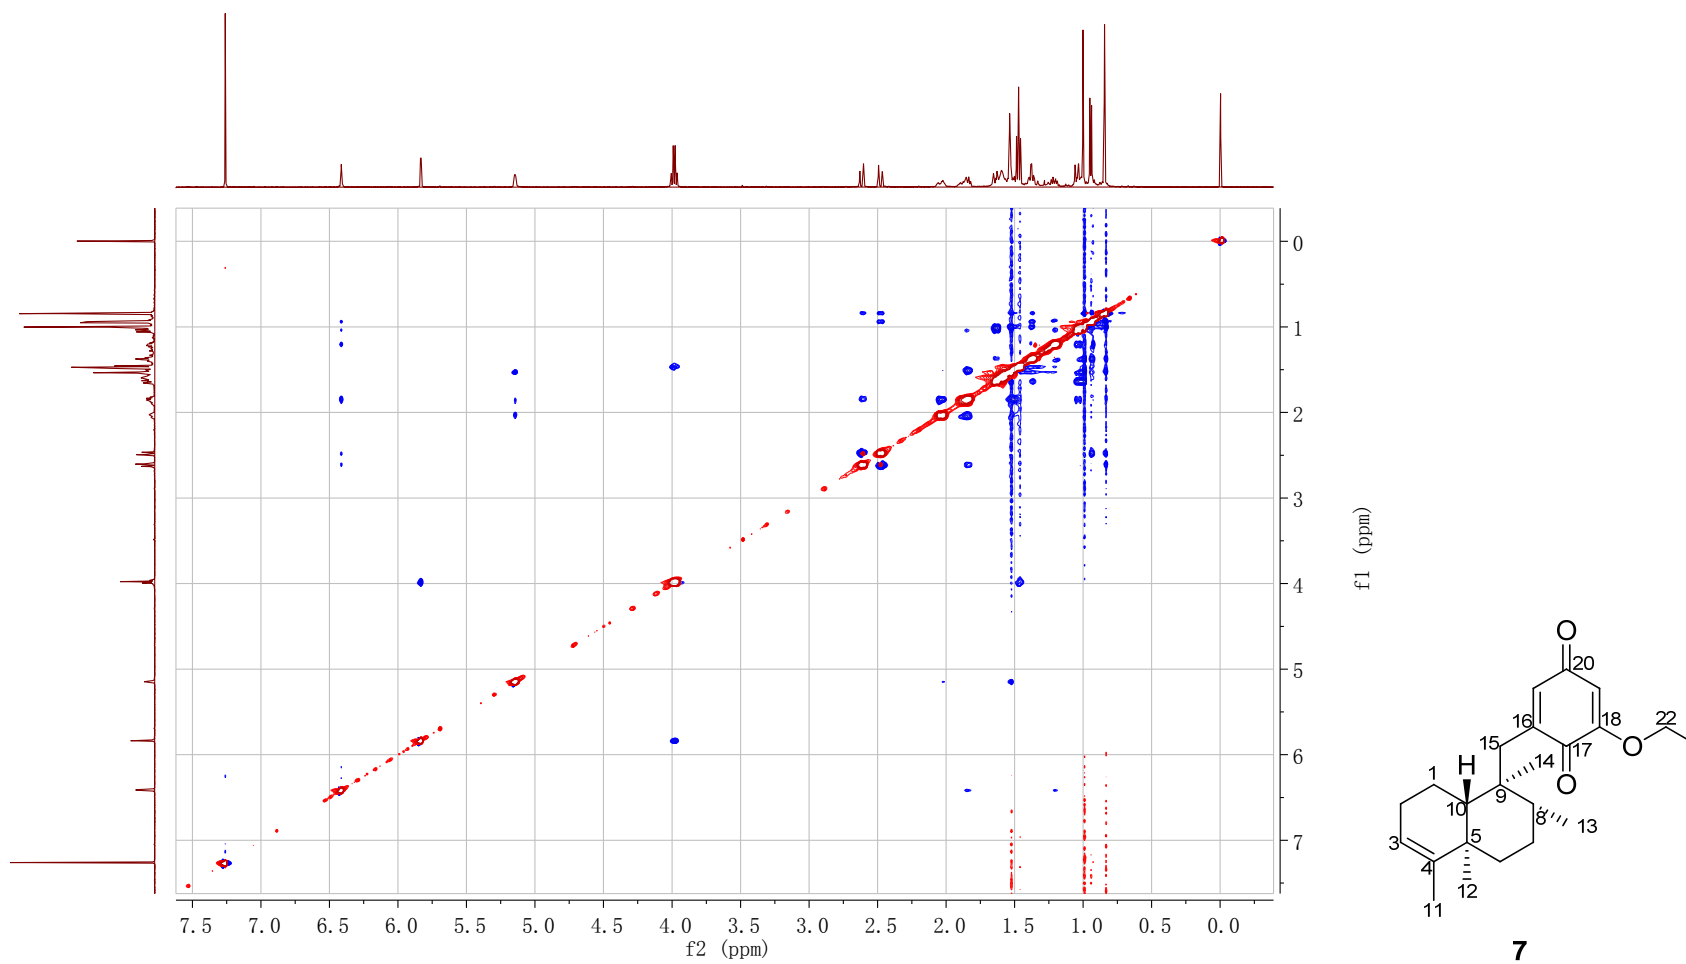

**Figure S73.** NOESY Spectrum of (5*R*,8*R*,9*S*,10*R*)-18-ethoxylavarone (**7**).

Tolerance = 20.0 PPM / DBE: min = -1.5, max = 50.0  
 Selected filters: None

Monoisotopic Mass, Even Electron Ions  
 13 formula(e) evaluated with 1 results within limits (up to 50 closest results for each mass)

Elements Used:

C: 10-25 H: 10-40 O: 1-6 Na: 1-1

SIPI

XT-12 M.W=356

WQ12-327H2 81 (2.854) AM (Cen,4, 80.00, Ar,5000.0,384.13,0.70); Sm (SG, 2x1.00); Cm (63:81)

Q-ToF micro  
 YA019  
 379.2247

17-Jul-2012,13:43:54

TOF MS ES+  
 7.91e3

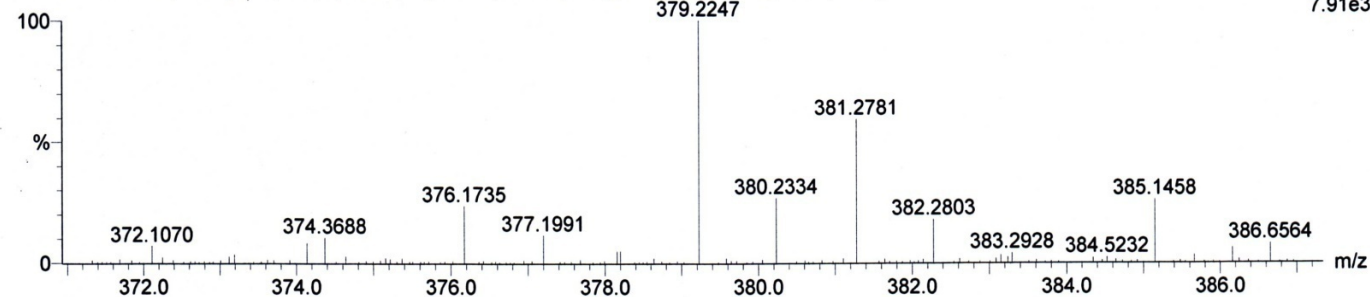

Minimum: 70.00  
 Maximum: 100.00

| Mass     | RA     | Calc. Mass | mDa  | PPM  | DBE | i-FIT  | Formula                                           |
|----------|--------|------------|------|------|-----|--------|---------------------------------------------------|
| 379.2247 | 100.00 | 379.2249   | -0.2 | -0.5 | 7.5 | 2244.6 | C <sub>23</sub> H <sub>32</sub> O <sub>3</sub> Na |

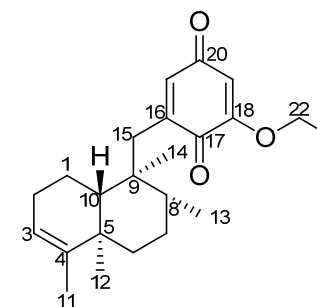

7

Figure S74. HRESIMS of (5*R*,8*R*,9*S*,10*R*)-18-ethoxylavarone (7).



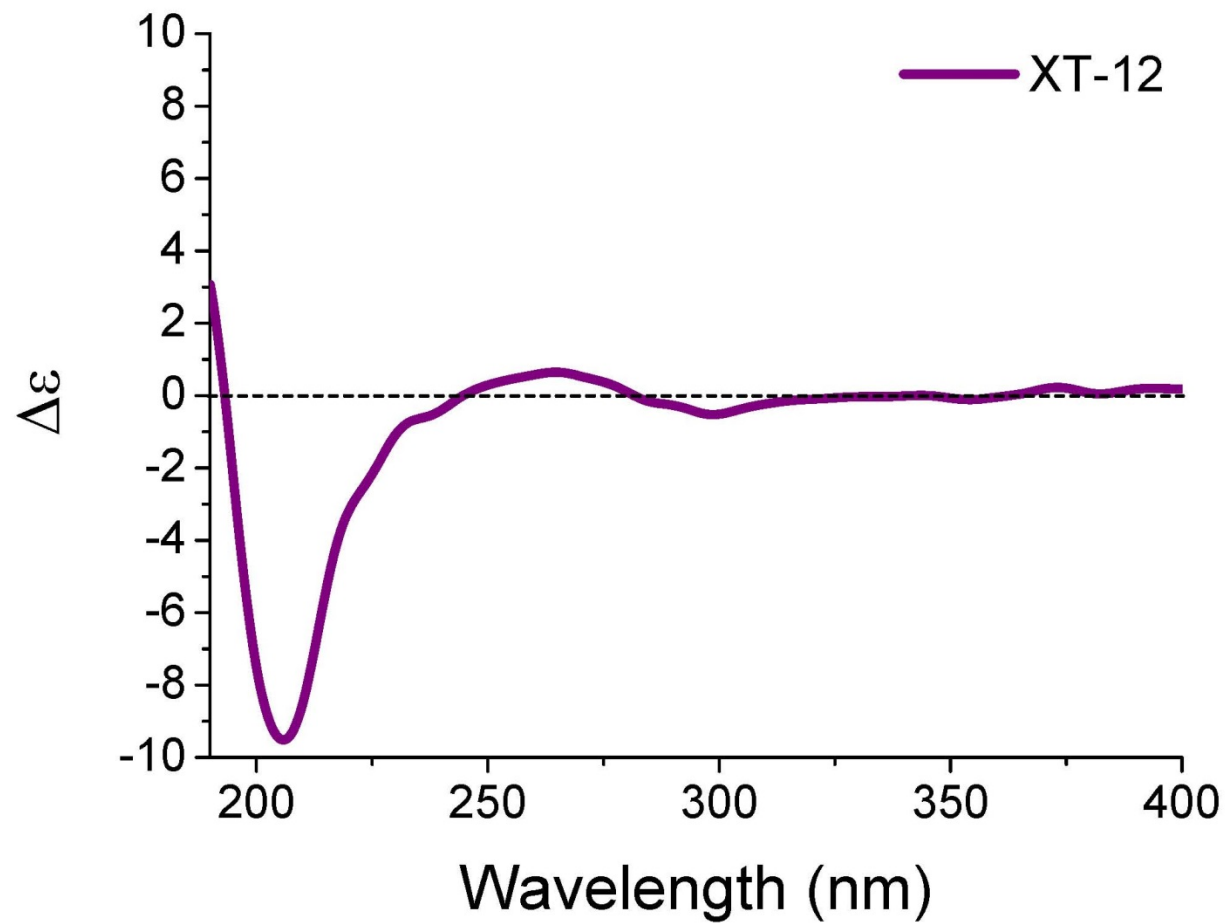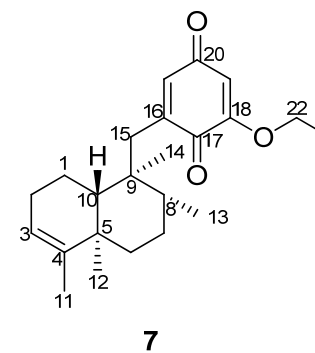

**Figure S75.** CD Spectrum of (5*R*,8*R*,9*S*,10*R*)-18-ethoxylavarone (**7**) in MeOH.

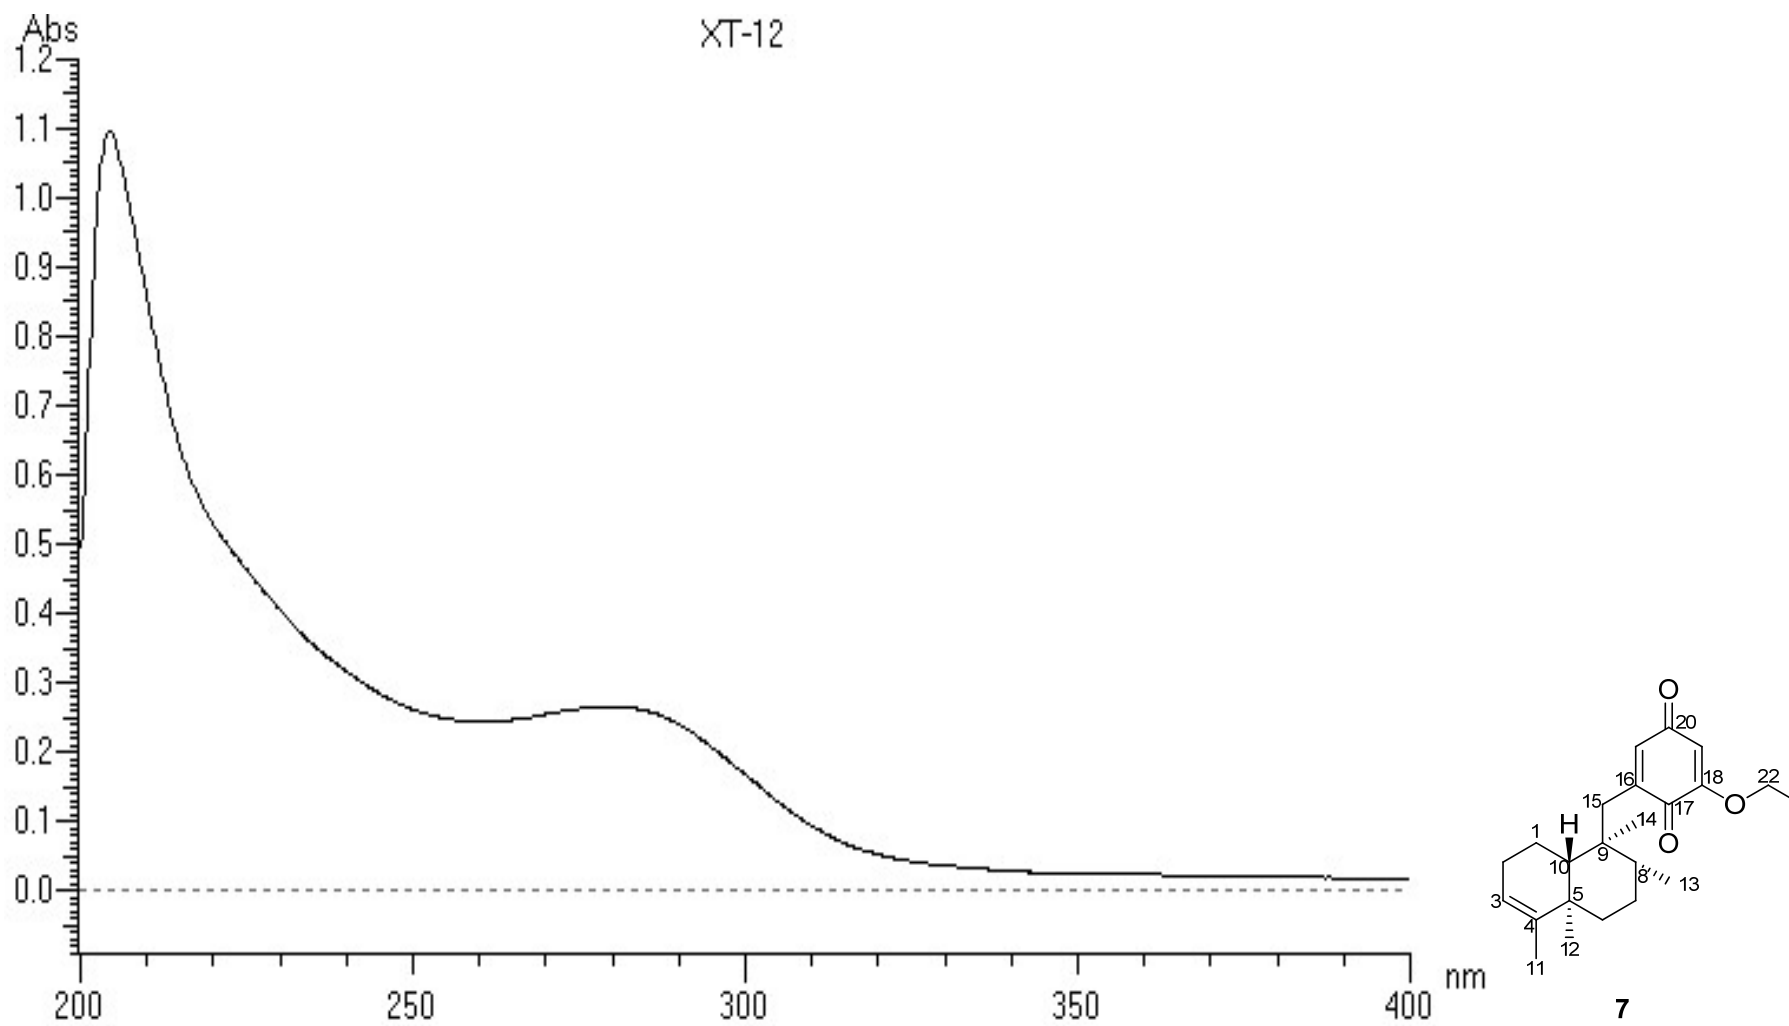

**Figure S76.** UV Spectrum of (5*R*,8*R*,9*S*,10*R*)-18-ethoxylavarone (**7**).

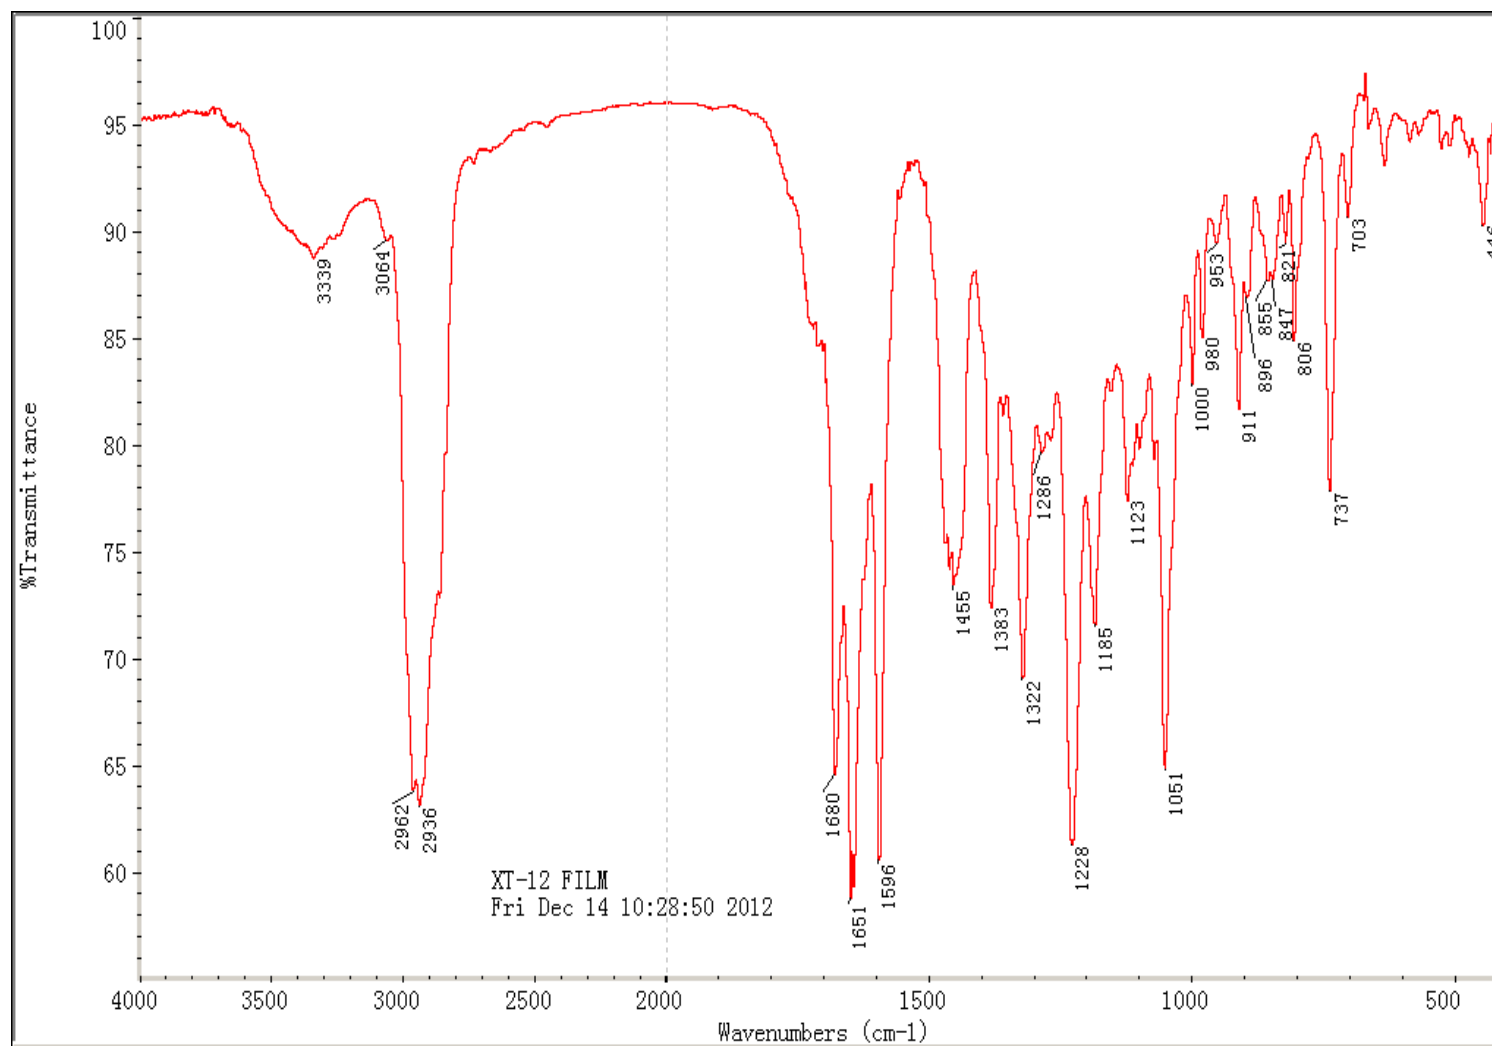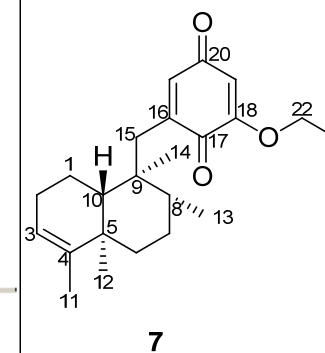

**Figure S77.** IR Spectrum of (5*R*,8*R*,9*S*,10*R*)-18-ethoxylavarone (**7**).

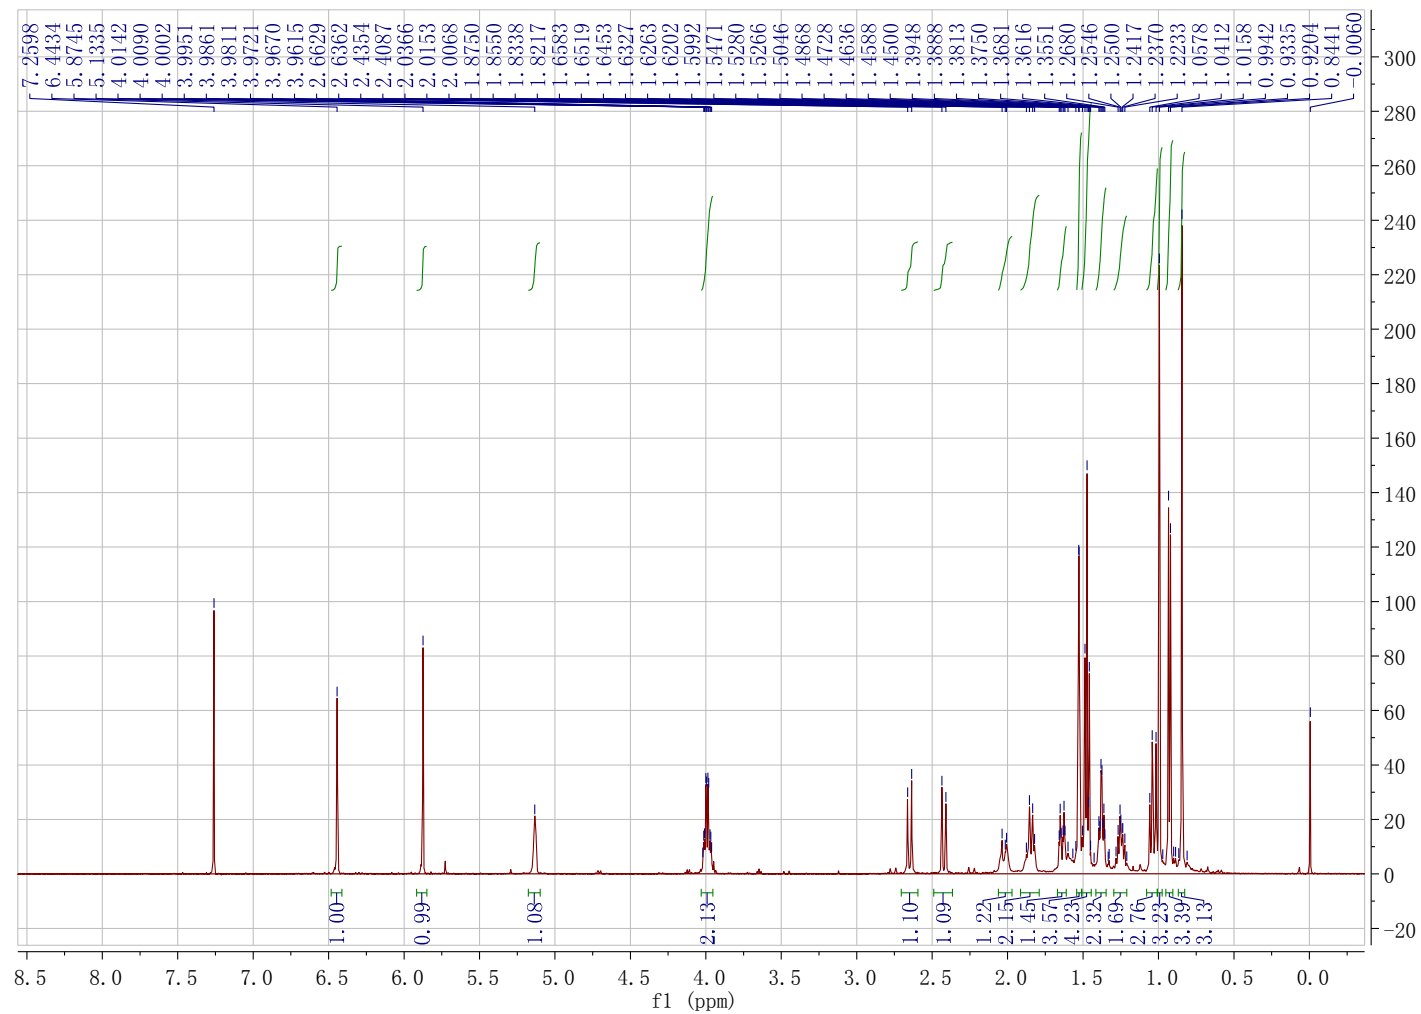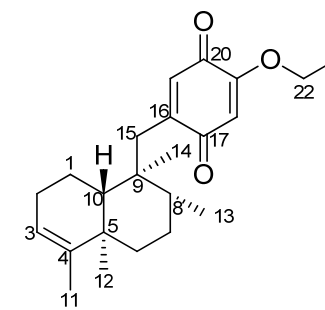

**8**

**Figure S78.**  $^1\text{H}$  NMR Spectrum of (5*R*,8*R*,9*S*,10*R*)-19-ethoxylarone (**8**).

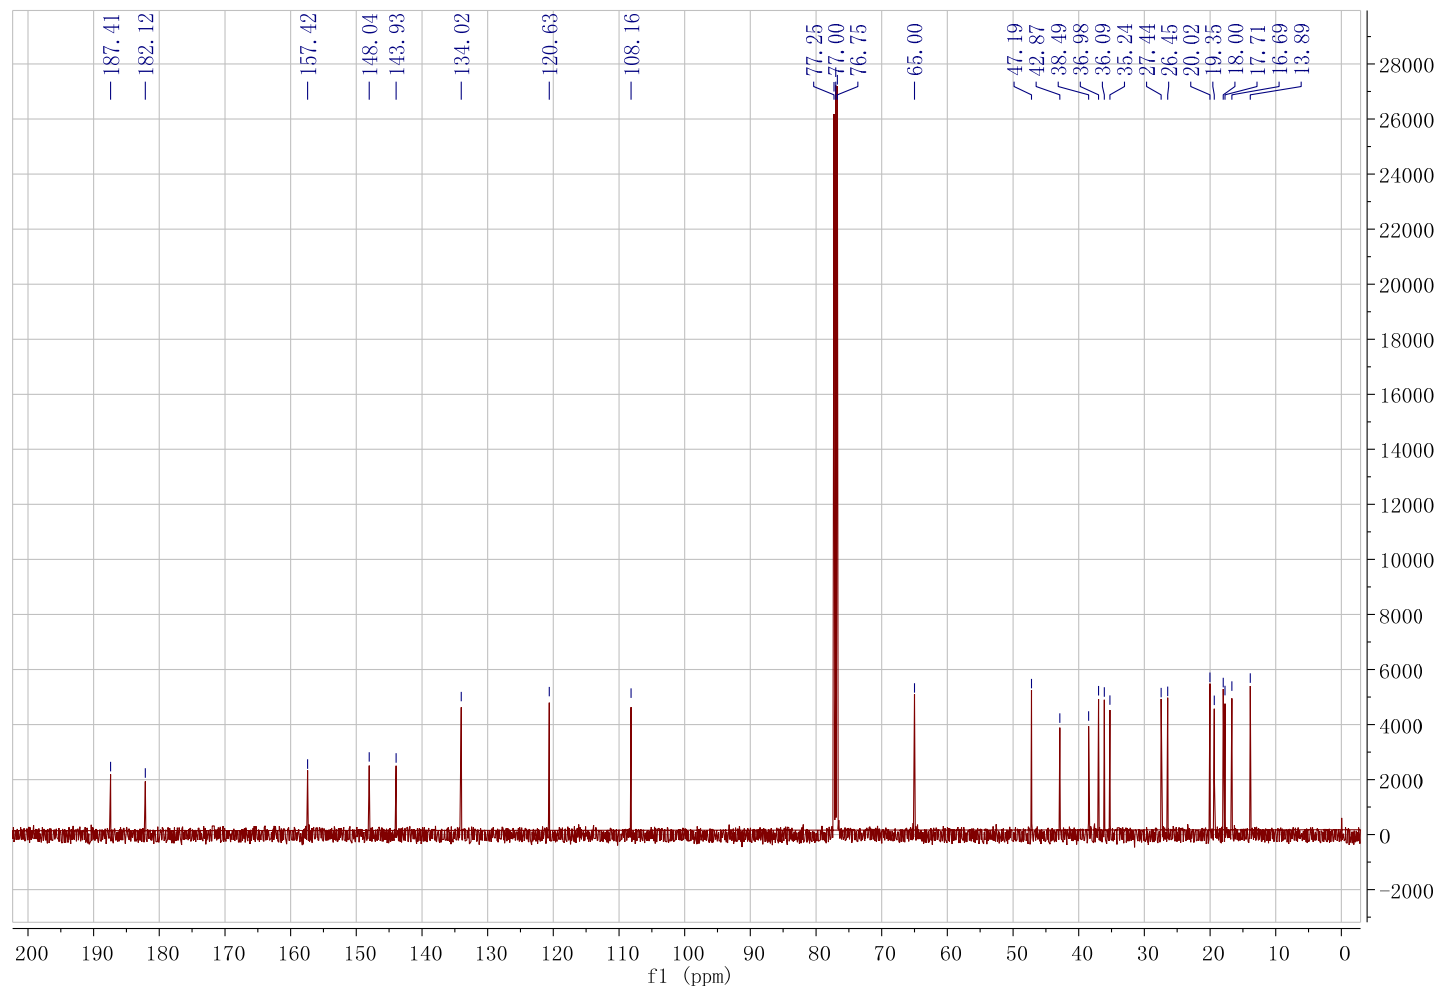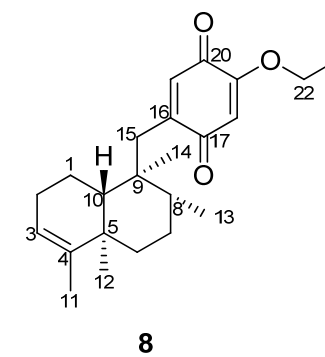

**Figure S79.**  $^{13}\text{C}$  NMR Spectrum of (5*R*,8*R*,9*S*,10*R*)-19-ethoxylavarone (**8**).

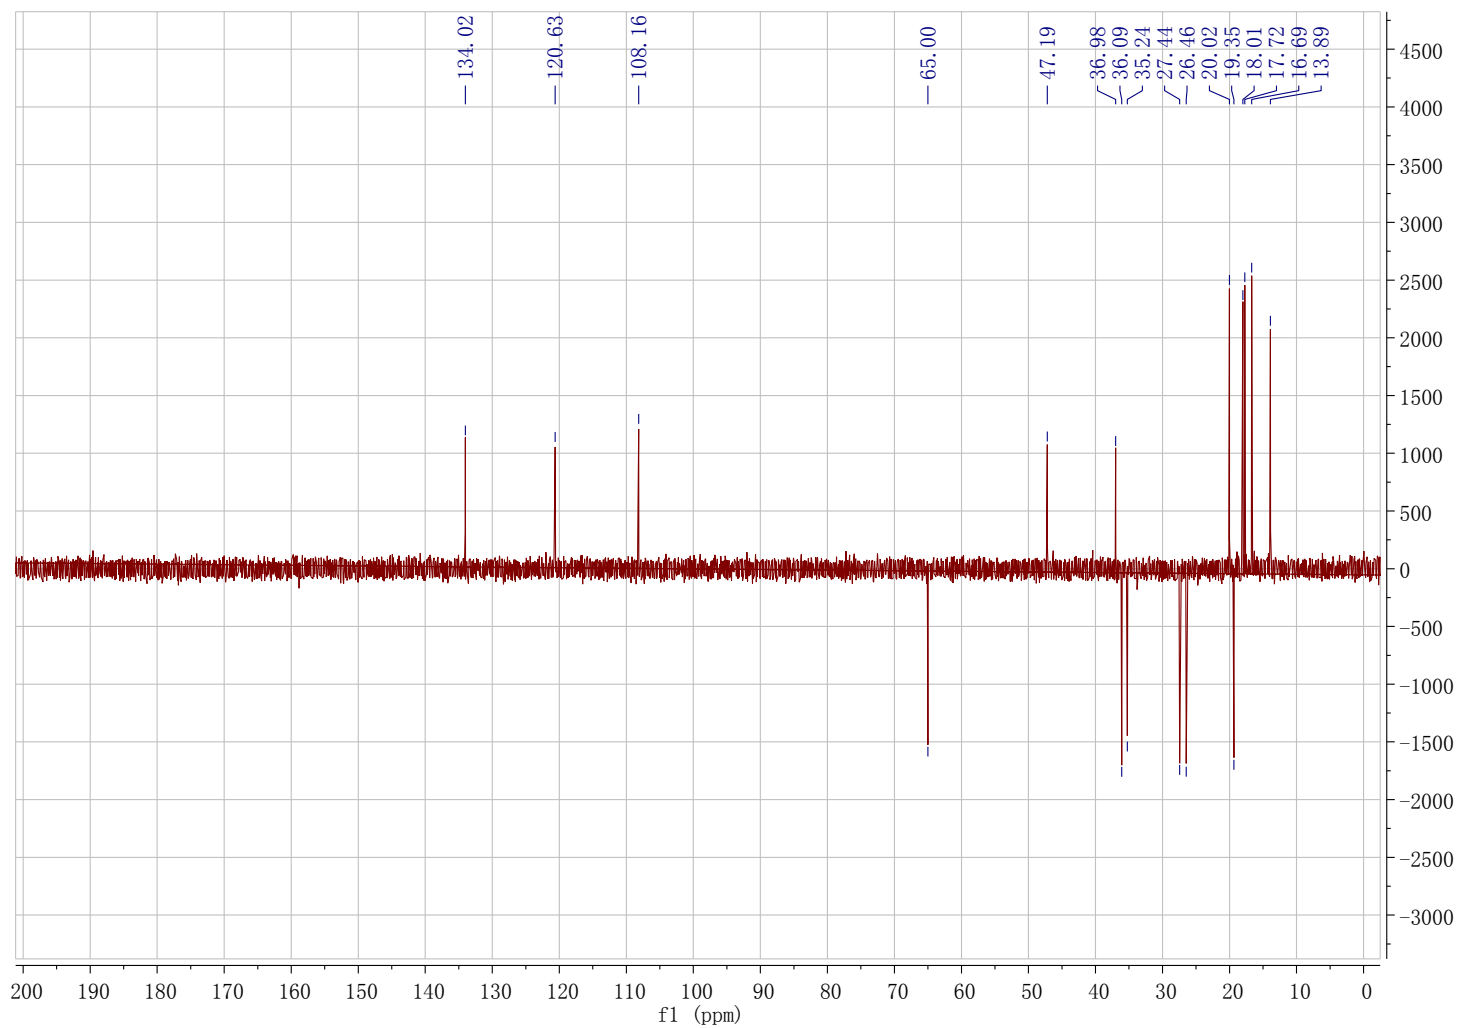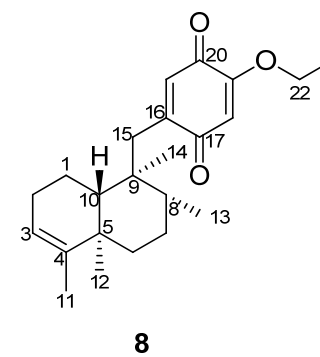

**Figure S80.** DEPT Spectrum of (5R,8R,9S,10R)-19-ethoxylavarone (**8**).

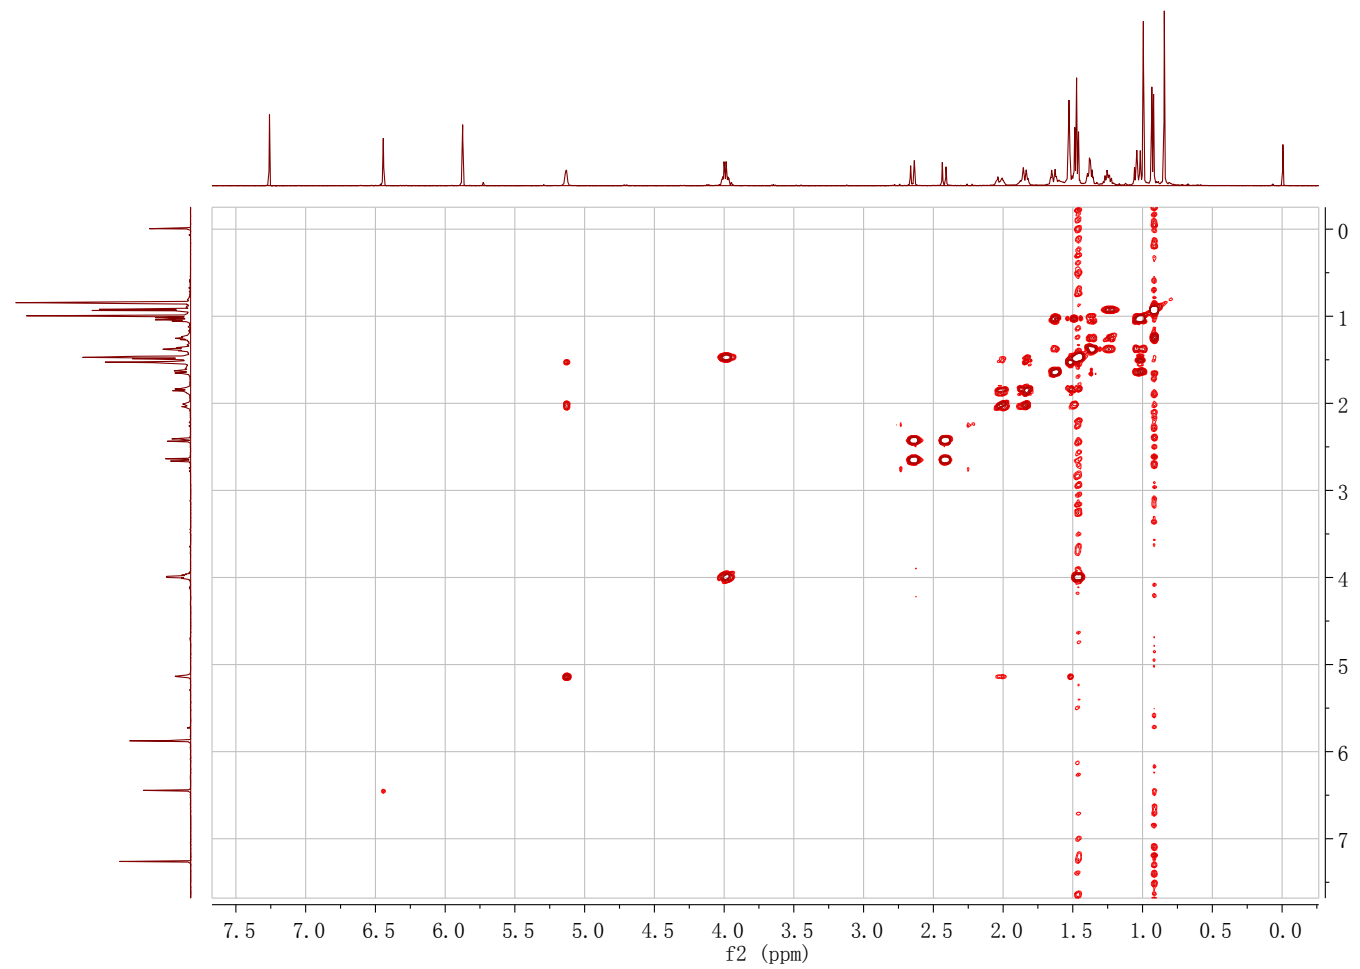

f1 (ppm)

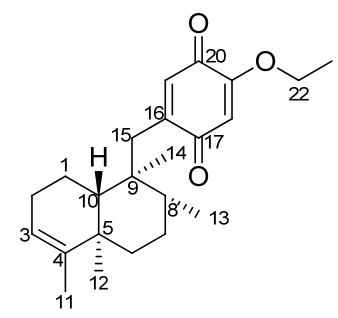

**8**

**Figure S81.**  $^1\text{H}$ - $^1\text{H}$  COSY Spectrum of (5*R*,8*R*,9*S*,10*R*)-19-ethoxylavarone (**8**).

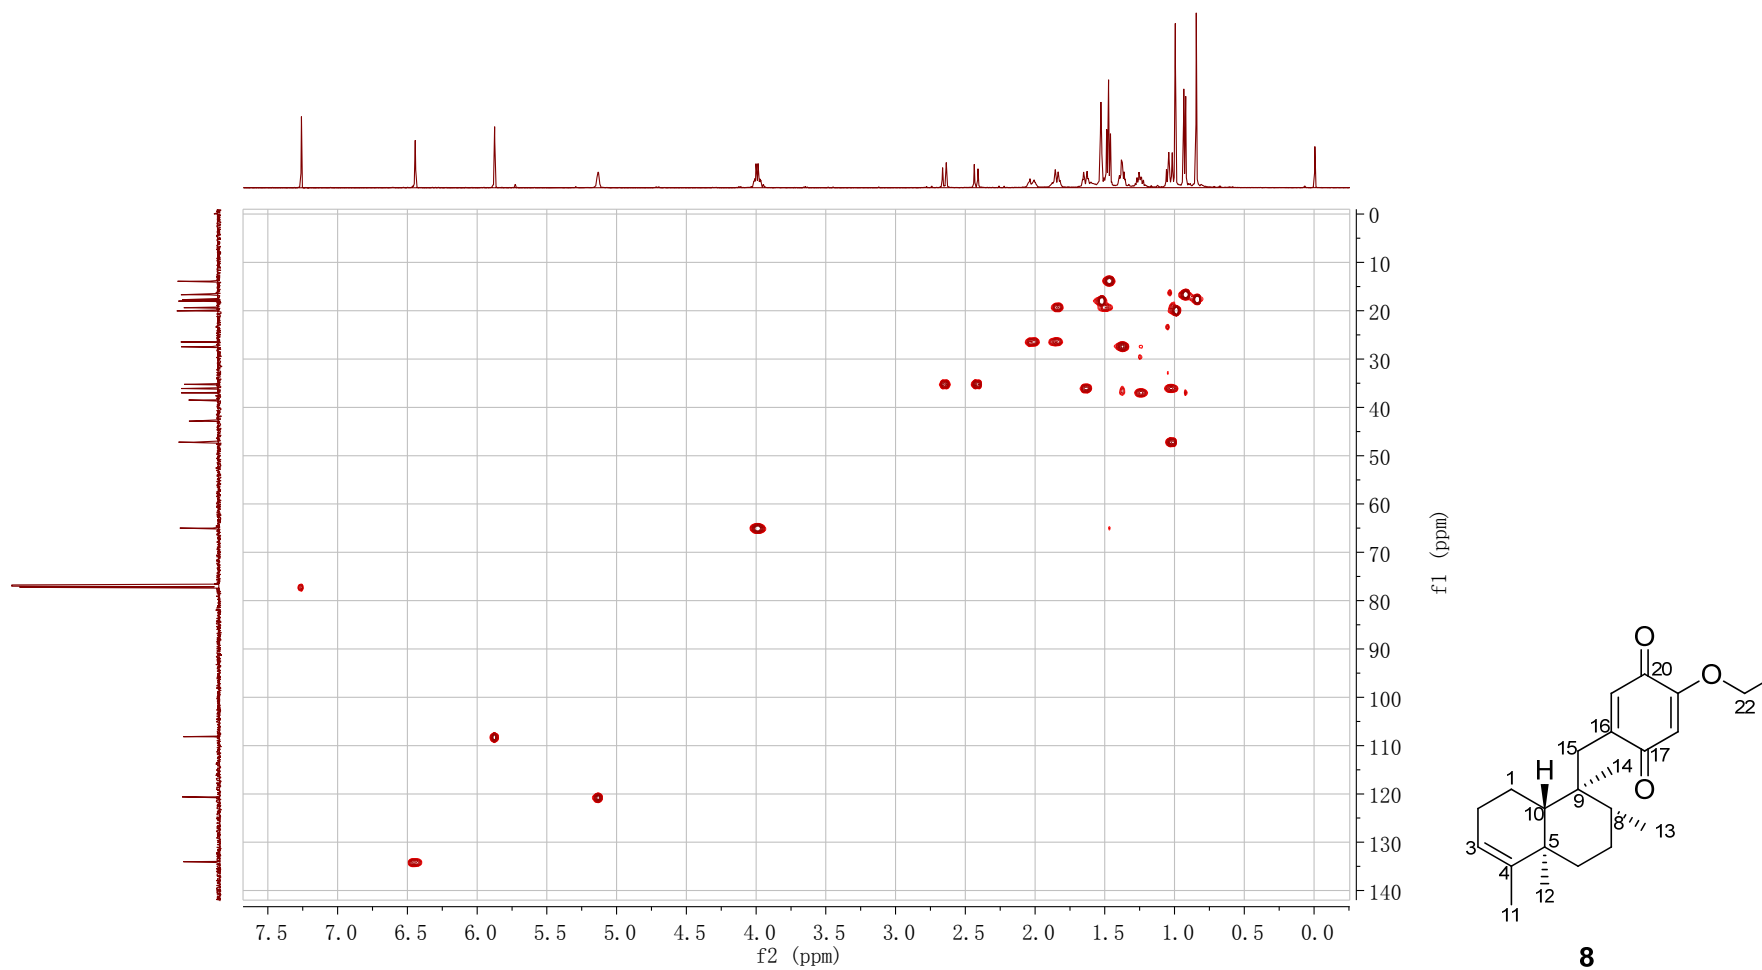

**Figure S82.** HSQC Spectrum of (5R,8R,9S,10R)-19-ethoxylavarone (**8**).



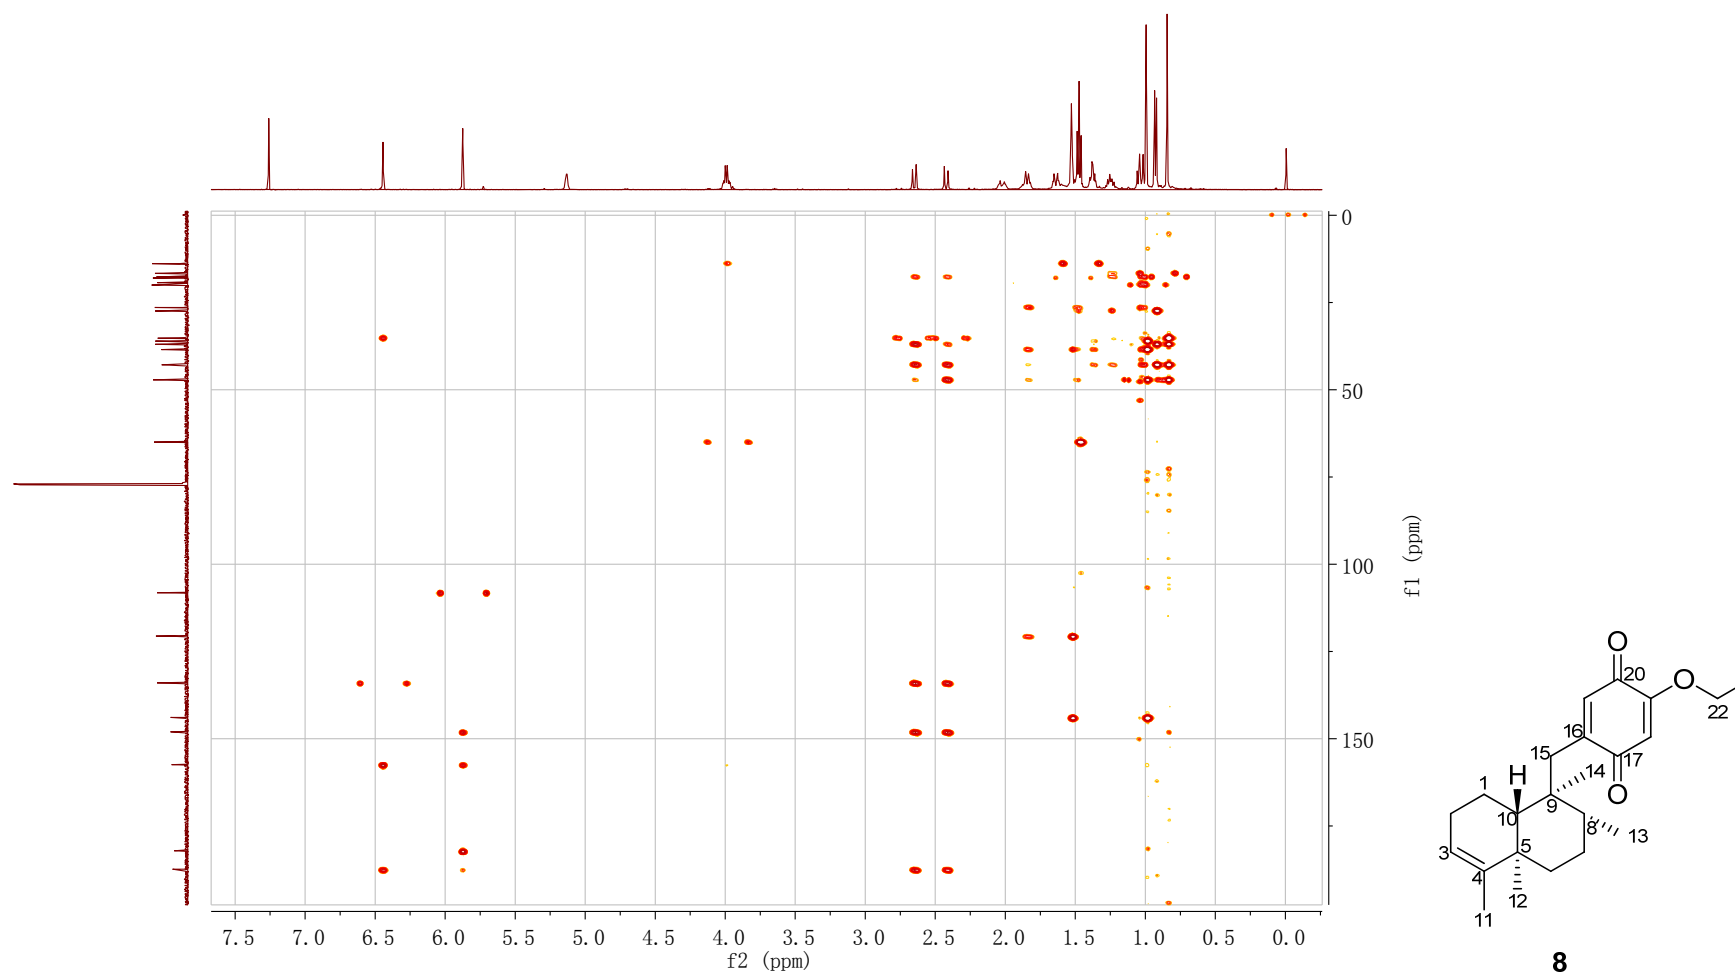

**Figure S83.** HMBC Spectrum of (5R,8R,9S,10R)-19-ethoxylavarone (**8**).

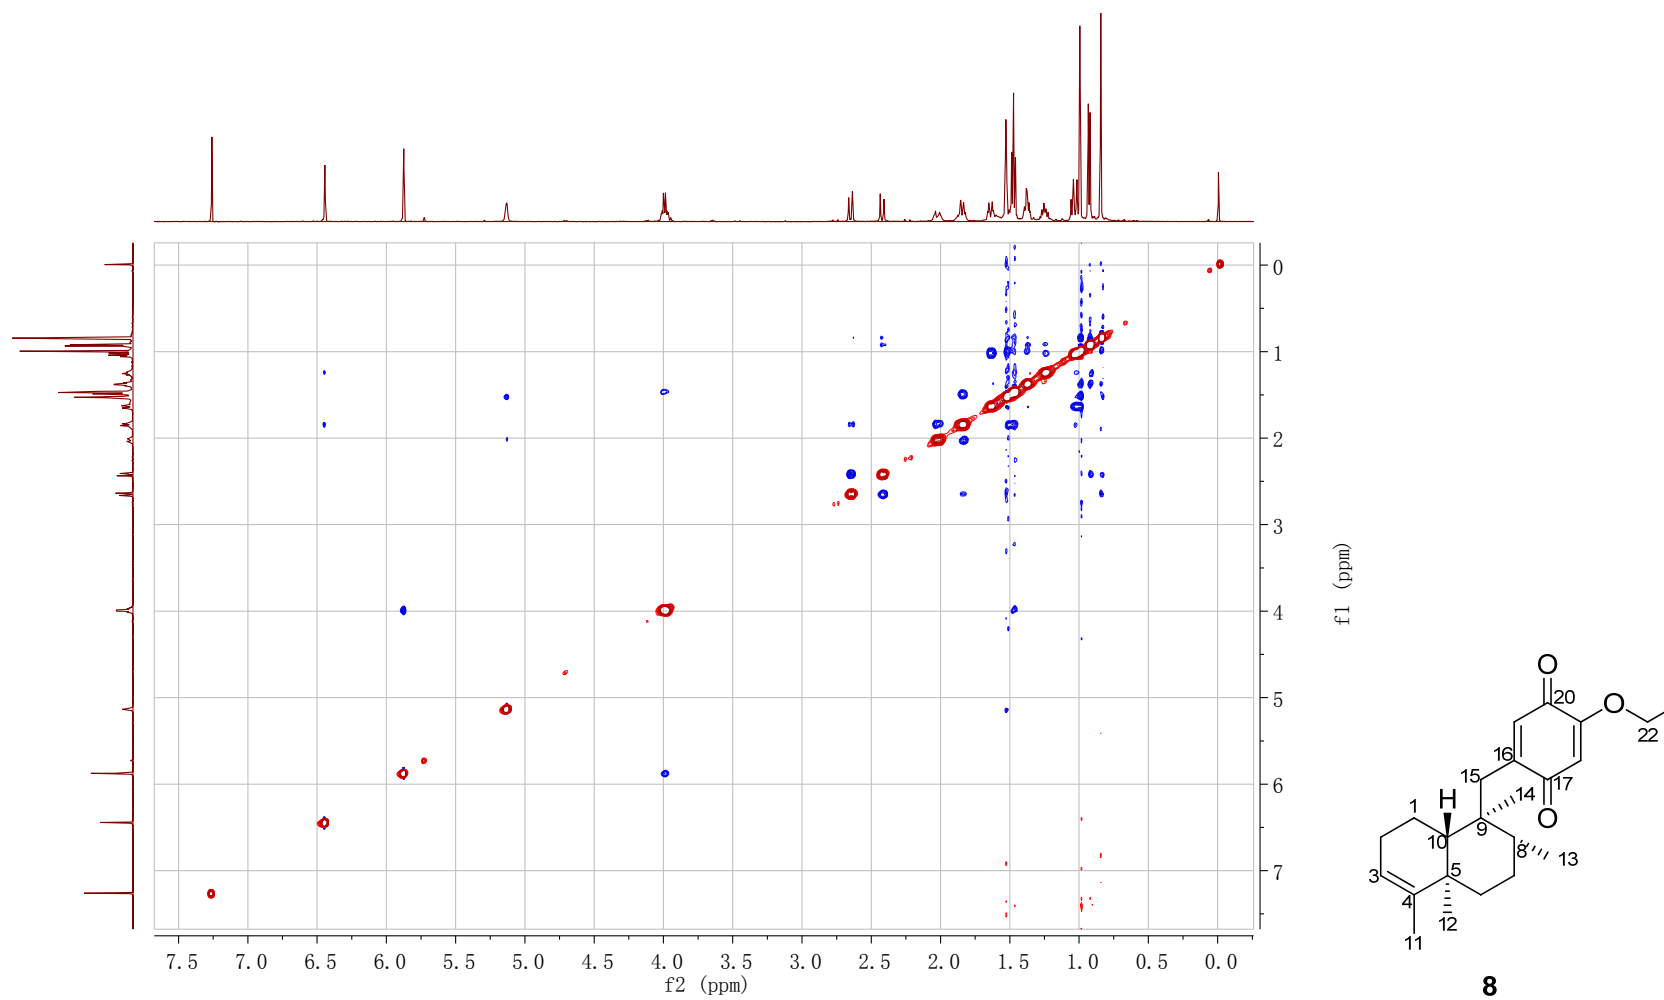

**Figure S84.** NOESY Spectrum of (5*R*,8*R*,9*S*,10*R*)-19-ethoxylavarone (**8**).

Elemental Composition Report *XT-6*

Tolerance = 20.0 PPM / DBE: min = -1.5, max = 50.0  
 Selected filters: None

Monoisotopic Mass, Even Electron Ions  
 13 formula(e) evaluated with 1 results within limits (up to 50 closest results for each mass)

Elements Used:

C: 10-25 H: 10-40 O: 1-6 Na: 1-1

SIPI

XT-6 M.W.=356

WQ12-322H 23 (0.810) AM (Gen,4, 80.00, Ar,5000.0,376.07,0.70); Sm (SG, 2x1.00); Cm (7:24)

Q-ToF micro  
 YA019

16-Jul-2012,14:52:04

TOF MS ES+  
 1.21e4

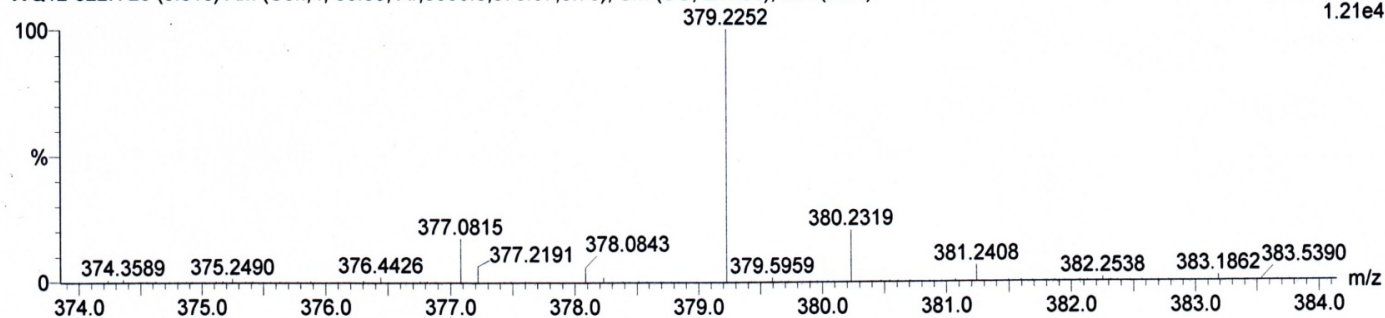

Minimum: 70.00  
 Maximum: 100.00

| Mass     | RA     | Calc. Mass | mDa | PPM | DBE | i-FIT | Formula       |
|----------|--------|------------|-----|-----|-----|-------|---------------|
| 379.2252 | 100.00 | 379.2249   | 0.3 | 0.8 | 7.5 | 138.3 | C23 H32 O3 Na |

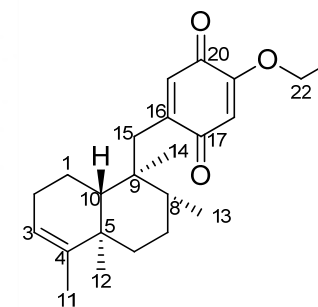

8

Figure S85. HRESIMS of (5R,8R,9S,10R)-19-ethoxylavarone (8).

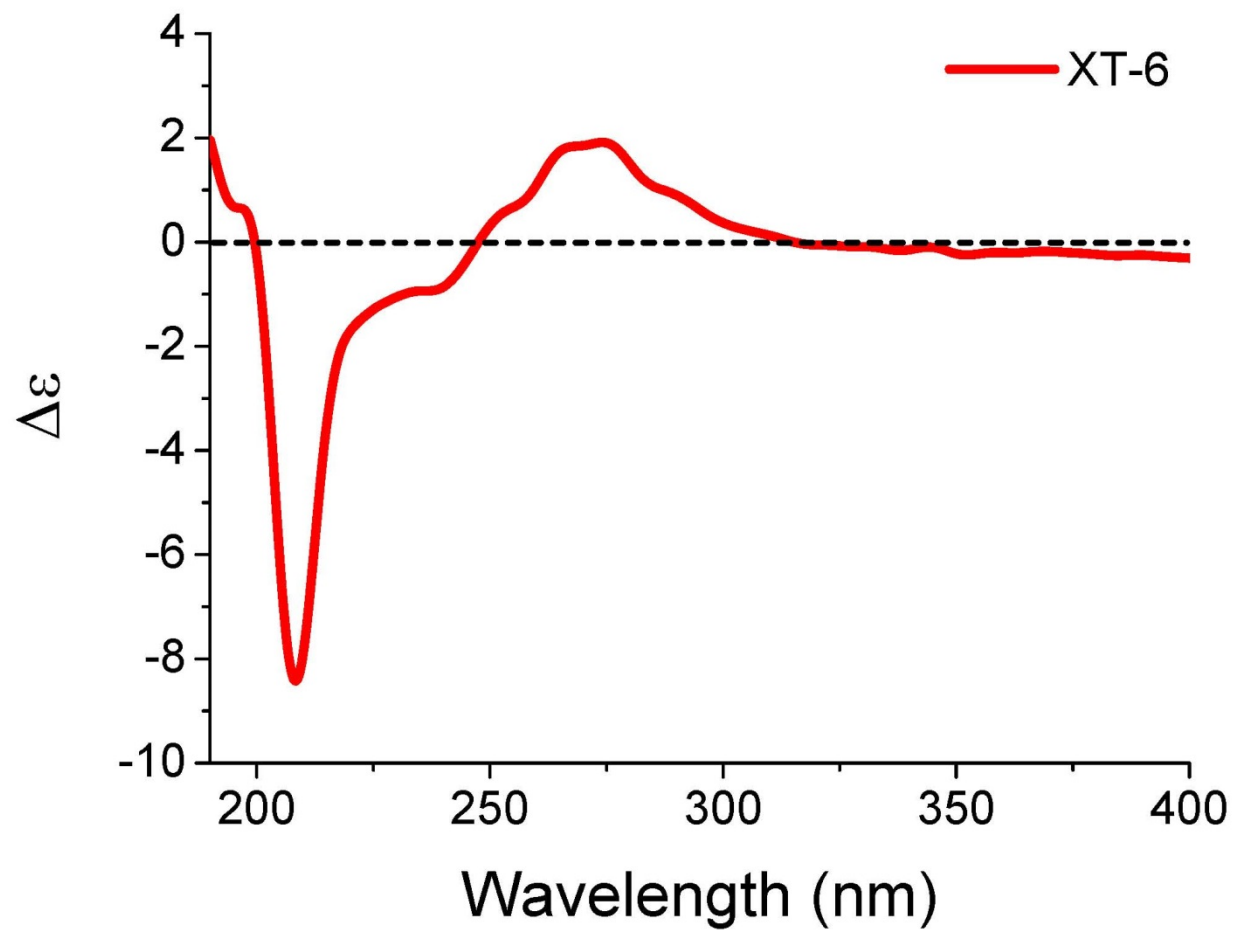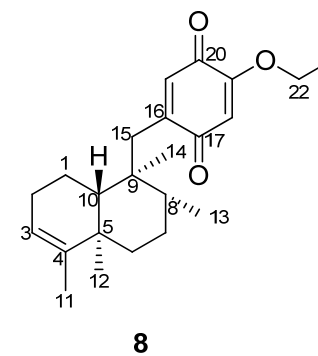

**Figure S86.** CD Spectrum of (5R,8R,9S,10R)-19-ethoxylavarone (**8**) in MeOH.

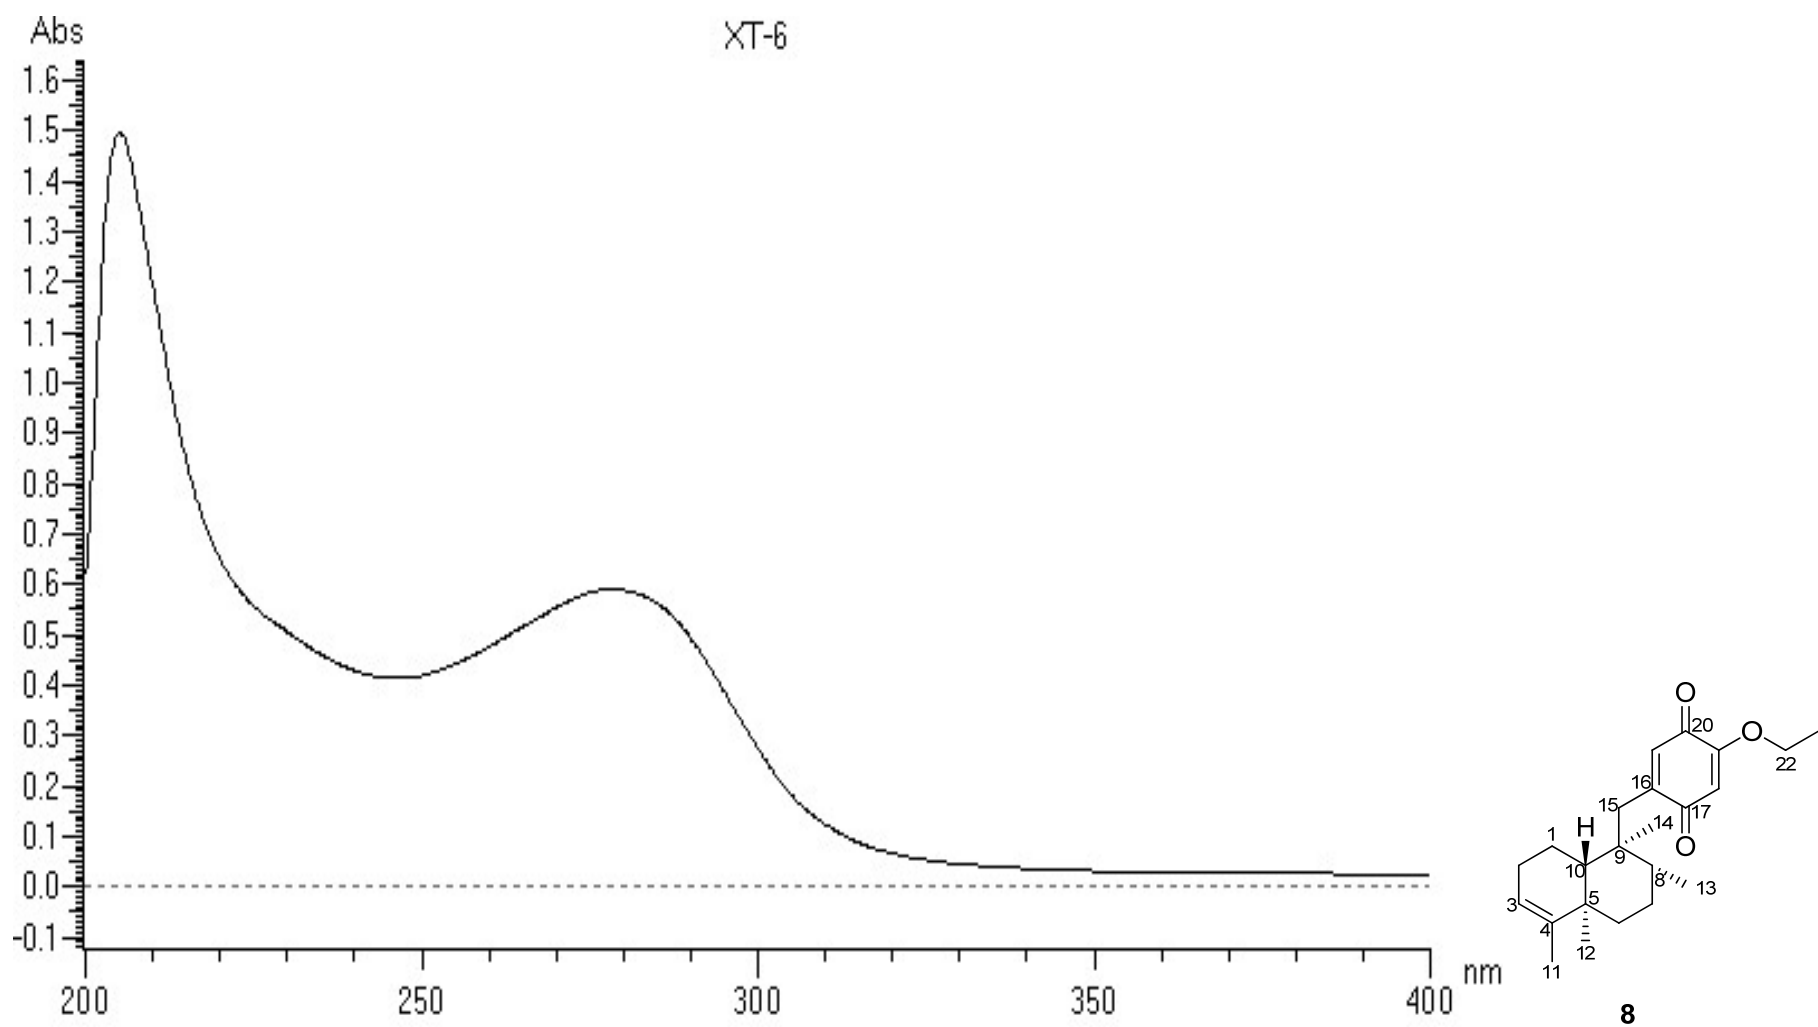

**Figure S87.** UV Spectrum of (5*R*,8*R*,9*S*,10*R*)-19-ethoxylavarone (**8**).

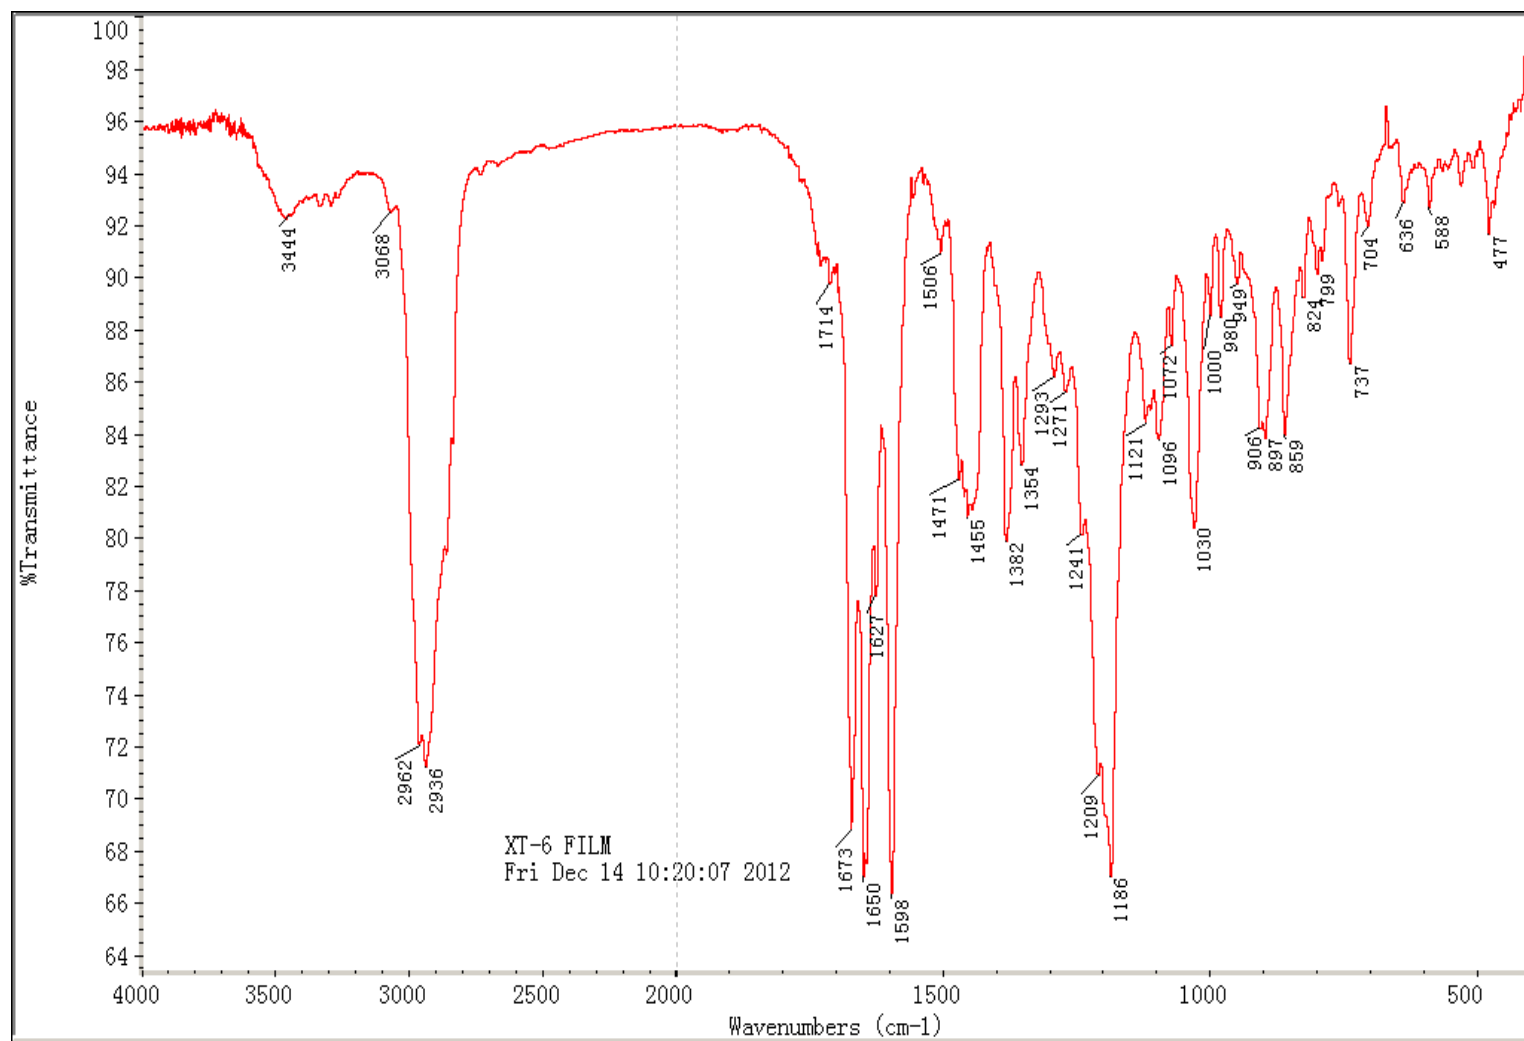

**Figure S88.** IR Spectrum of (5R,8R,9S,10R)-19-ethoxylavarone (**8**).
